# Supplementary material for: The reporting of p values, confidence intervals and statistical significance in Preventive Veterinary Medicine (1997–2017)
Source: PeerJ. 2021 Nov 24;9:e12453. doi: 10.7717/peerj.12453 (PMC8627125; doi:10.7717/peerj.12453)
Supplement: Supplemental Information 1 [file peerj-09-12453-s001.xlsx]

## Sheet: Initial search
ID	DataEntry	Month_Year	Volume	Title	Subject	P_abs	P_result_text	P_table	P_discuss	SIG_abs	SIG_result_text	SIG_table	SIG_discuss	CI_abs	CI_result_text	CI_table	CI_discuss	Year
1	1	1997-02-01	29	Nation-wide Salmonella enterica surveillance and control in Danish slaughter swine herds	l	0	0	1	0	0	1	0	1	0	0	0	0	1997
2	1	1997-02-01	29	The Michigan equine monitoring system. I. Design, implementation and population estimates	h	0	0	0	0	0	0	0	1	0	0	0	0	1997
3	1	1997-02-01	29	The Michigan equine monitoring system. II. Frequencies and impact of selected health problems	h	0	0	0	0	0	0	0	0	0	0	0	0	1997
4	1	1997-02-01	29	Bluetongue virus seropositivity in sheep flocks in North West Frontier Province, Pakistan	l	1	0	1	0	1	0	1	1	0	0	0	0	1997
5	1	1997-02-01	29	Simulation analysis of the effect of herd immunity and age structure on infection of cattle herd with bluetongue viruses in Queensland, Australia	l	0	0	0	1	0	0	0	1	0	0	0	0	1997
6	1	1997-02-01	29	Agricultural policy and social returns to eradication programs: the case of Aujeszky's disease in Sweden	o	0	0	0	0	0	0	0	0	0	0	0	0	1997
7	1	1998-03-01	34	Individual and group antimicrobial usage rates on 34 farrow-to-finish swine farms in Ontario, Canada	l	0	1	0	0	0	1	0	1	0	0	0	0	1998
8	1	1998-03-01	34	Prevalences of resistance to seven antimicrobials among fecal Escherichia coli of swine on thirty-four farrow-to-finish farms in Ontario, Canada	l	0	1	1	0	0	1	1	1	0	0	0	0	1998
9	1	1998-03-01	34	Associations among antimicrobial drug treatments and antimicrobial resistance of fecal Escherichia coli of swine on 34 farrow-to-finish farms in Ontario, Canada	l	0	1	0	1	1	1	0	1	0	0	0	0	1998
10	1	1998-03-01	34	Cost analysis of immunisation against East Coast fever on smallholder dairy farms in Kenya	l	0	0	0	0	0	0	0	1	0	0	0	0	1998
11	1	1998-03-01	34	Factors associated with seroprevalence to Mycobacterium paratuberculosis in small-ruminant farms in the Madrid region (Spain)	l	0	1	1	1	1	1	0	1	0	1	1	0	1998
12	1	1999-03-01	39	An on-farm study of the epidemiology of Actinobacillus pleuropneumoniae infection in pigs as part of a vaccine efficacy trial	l	0	1	1	0	0	1	0	1	0	1	1	0	1999
13	1	1999-03-01	39	Field efficacy of a combined use of Mycoplasma hyopneumoniae and Actinobacillus pleuropneumoniae vaccines in growing pigs	l	1	1	1	0	1	1	0	1	0	0	0	0	1999
14	1	1999-03-01	39	The effect of maternally derived immunoglobulin G on the risk of respiratory disease in heifers during the first 3 months of life	l	0	1	1	1	0	1	0	1	0	1	1	0	1999
15	1	1999-03-01	39	Prevalence and risk factors associated with adventitious bursitis in live growing and finishing pigs in south-west England	l	0	0	1	0	1	1	1	1	0	0	1	0	1999
16	1	1999-03-01	39	Factors affecting milk urea nitrogen and protein concentrations in Quebec dairy cows	l	0	0	1	0	1	1	1	1	0	0	0	0	1999
17	1	1999-03-01	39	The incidence, calf morbidity and mortality due to Theileria parva infections in smallholder dairy farms in Murang'a District, Kenya	l	1	1	1	0	1	1	1	1	0	0	0	0	1999
18	1	1999-03-01	39	Epidemiology and quality assurance application to food safety	o	0	0	0	0	0	0	0	0	0				1999
19	1	1999-03-01	39	Epidemiology and quality assurance: applications at farm level	o	0	0	0	0	0				0	0	0	0	1999
20	1	1999-03-01	39	From ecopathology' to agroecosystem health'	o	0	0	0	0	0				0	0	0	0	1999
21	1	1999-03-01	39	An evaluation of tuberculin skin tests used to diagnose tuberculosis in swamp buffaloes (Bubalus bubalis)	e	0	1	0	0	0	1	0	1	0	1	1	0	1999
22	1	1999-03-01	39	Analysis of correlated continuous repeated observations: modelling the effect of ketosis on milk yield in dairy cows	l	0	0	1	0	1	0	1		0	0	0	0	1999
23	1	2000-03-01	44	Bulk-tank milk ELISA antibodies for estimating the prevalence of paratuberculosis in Danish dairy herds	l	0	0	0	0	0	0	0	0	0	0	1	0	2000
24	1	2000-03-01	44	Risk factors for Salmonella persistence after cleansing and disinfection in French broiler-chicken houses	p	0	0	1	0	0	1	1	1	0	0	1	0	2000
25	1	2000-03-01	44	Evaluating control strategies for outbreaks in BHV1-free areas using stochastic and spatial simulation	o	0	0	1	0	0	1	1	1	0	0	0	1	2000
26	1	2000-03-01	44	The foot-and-mouth disease risk posed by African buffalo within wildlife conservancies to the cattle industry of Zimbabwe	u	0	0	0	0	0	0	0	0	0	0	0	0	2000
27	1	2000-03-01	44	Corrigendum to A linear programming assessment of the profit from strategies to reduce the prevalence of Staphylococcus aureus mastitis"	o	0	0	0	0	0	0	0	0	0	0	0	0	2000
28	1	2000-03-01	44	Community-based active surveillance for rabies in Machakos District, Kenya	o	0	1	1	0	0	1	0	0	0	1	0	0	2000
29	1	2000-03-01	44	Risk factors for epidemic respiratory disease in Norwegian cattle herds	l	0	0	1	0	0	0	0	1	0	1	1	0	2000
30	1	2000-03-01	44	Risk factors for high herd level calf morbidity risk from birth to weaning in beef herds in the USA	l	0	1	1	1	0	0	0	1	0	1	1	1	2000
31	1	2000-03-01	44	Mortality in sahelian goats in Nigeria	l	0	0	1	0	0	1	0	0	0	0	0	0	2000
32	1	2000-03-01	44	A matched case-control study of factors associated with retention of fetal membranes in dairy ewes in Southern Greece	l	0	1	1	0	0	0	0	1	0	0	1	0	2000
33	1	2001-03-01	48	Can epidemiology and economics make a meaningful contribution to national animal-disease control?	o	0				0				0				2001
34	1	2001-03-01	48	International trade, animal health and veterinary epidemiology: challenges and opportunities	o	0				0				0				2001
35	1	2001-03-01	48	The role of veterinary epidemiology in the study of free-roaming dogs and cats	s	0				0				0				2001
36	1	2001-03-01	48	The role of epidemiology in the prevention, diagnosis, and control of infectious diseases of fish	a	0				0				0				2001
37	1	2001-03-01	48	Methods to investigate spatial and temporal clustering in veterinary epidemiology	o	0				0				0				2001
38	1	2002-03-01	53	Foot/leg udder health in relation to housing changes in Swedish dairy herds	l	0	1	1	0	1	1	1	1	0	0	1	0	2002
39	1	2002-03-01	53	Maximum-likelihood estimation of sensitivity and specificity of ELISAs and faecal culture for diagnosis of paratuberculosis	o	0	0	0	0	0	0	0	0	0	0	0	1	2002
40	1	2002-03-01	53	Risk factors for Aujeszky's disease in pig herds and detection of field virus antibodies in fattening pugs in the state of Yucatan, Mexico	l	0	1	1	0	1	1	1	1	0	0	1	0	2002
41	1	2002-03-01	53	Topical treatment of digital dermatitis associated with severe heel-horn erosion in a Swedish dairy herd	l	1	1	0	0	1	1	0	1	0	1	0	0	2002
42	1	2002-03-01	53	Animal- and herd-level risk factors for leptospiral seropositivity among sows in the Mekong delta, Vietnam	l	1	1	1	0	0	1	1	0	0	1	1	0	2002
43	1	2003-03-01	57	VETSTAT- the Danish system for surveillance of the veterinary use of drugs for production animals	o	0	0	0	0	0	0	0	0	0	0	0	0	2003
44	1	2003-03-01	57	The need for built-in validation of surveillance data so that changes in diagnostic performance of post-mortem meat inspection can be detected.	o	0	0	1	0	0	1	0	0	0	1	1	0	2003
45	1	2003-03-01	57	Factor analysis of minimum-inhibitory concentrations for Escherichia coli isolated from feedlot cattle to model relationships among antimicrobial-resistance outcomes	l	0	1	0	0	0	1	0	0	0	0	0	0	2003
46	1	2003-03-01	57	Validation of a Neospora caninum iscom ELISA without a gold standard	o	0	0	0	0	0	0	0	0	0	0	1	0	2003
47	1	2003-03-01	57	The foot-and-mouth disease epidemic in The Netherlands in 2001	o	0	1	0	0	0	1	0	0	1	1	0	0	2003
48	1	2003-03-01	57	Prevalence of bovine tuberculosis in cattle in different farming systems in the eastern zone of Tanzania	l	0	1	0	0	1	1	0	0	0	0	0	0	2003
49	1	2004-03-01	62	Veterinary medicine protecting and promoting the public’s health and well-being	o	0				0				0				2004
50	1	2004-03-01	62	Measuring health and disease: progress in analytical approaches	o	0				0				0				2004
51	1	2004-03-01	62	Controlling emerging diseases in the 21st century	o	0				0				0				2004
52	1	2004-03-01	62	Impacting policy through science and education	o	0				0				0				2004
53	1	2005-03-01	67	The impact of badger removal on the control of tuberculosis in cattle herds in Ireland	m	0	1	1	0	1	1	1	1	0	1	0	1	2005
54	1	2005-03-01	67	Tuberculosis and brucellosis prevalence survey on dairy cattle in Mbarara milk basin (Uganda)	l	0	1	1	0	0	1	1	1	1	1	1	0	2005
55	1	2005-03-01	67	Evaluation of surveillance strategies for bovine tuberculosis (Mycobacterium bovis) using an individual based epidemiological model	l	0	0	0	0	0	1	1	0	0	0	1	0	2005
56	1	2005-03-01	67	A case study of capture–recapture methodology using scrapie surveillance data in Great Britain	o	0	0	0	0	1	0	0	1	0	1	0	1	2005
57	1	2006-03-01	73	Dynamics of verotoxin-producing Escherichia coli isolated from German beef cattle between birth and slaughter	l	0	0	1	0	1	1	1	1	0	1	1	0	2006
58	1	2006-03-01	73	Prevalence of Salmonella spp. on Canadian pig farms using liquid or dry-feeding	l	1	1	1	1	0	1	0	1	0	1	1	0	2006
59	1	2006-03-01	73	Claw trimming routines in relation to claw lesions, claw shape and lameness in Norwegian dairy herds housed in tie stalls and free stalls	l	0	0	1	1	0	1	1	1	0	1	1	0	2006
60	1	2006-03-01	73	Analysis of the 1999–2000 highly pathogenic avian influenza (H7N1) epidemic in the main poultry-production area in northern Italy	p	0	1	1	0	0	1	0	0	0	0	1	0	2006
61	1	2006-03-01	73	Ear-tag retention and identification methods for extensively managed water buffalo (Bubalus bubalis) in Trinidad	l	0	1	1	0	0	1	1	1	0	0	0	0	2006
62	1	2006-03-01	73	The role of spatial mixing in the spread of foot-and-mouth disease	o	1	1	0	0	1	1	0	1	0	0	0	1	2006
63	1	2007-03-01	78	The association between Mycobacterium avium subsp. paratuberculosis fecal shedding or clinical Johne's disease and lactation performance on two Minnesota, USA dairy farms	l	0	1	1	0	0	1	0	1	0	1	0	0	2007
64	1	2007-03-01	78	Impact of sedation method on the diagnosis of hip and elbow dysplasia in Swedish dogs	s	0	0	0	0	0	1	0	1	0	0	1	0	2007
65	1	2007-03-01	78	The spatial distribution of atopic dermatitis cases in a population of insured Swedish dogs	s	0	1	1	0	1	1	0	1	0	1	1	0	2007
66	1	2007-03-01	78	Tsetse control in cattle from pyrethroid footbaths	l	0	1	0	0	0	1	0	0	1	1	0	0	2007
67	1	2007-03-01	78	Serodiagnosis of equine infectious anemia by agar gel immunodiffusion and ELISA using a recombinant p26 viral protein expressed in Escgerichia coli as antigen	h	0	0	0	1	0	0	0	0	0	0	0	0	2007
68	1	2007-03-01	78	Animal-based national surveillance for zoonotic disease: Quality, limitations, and implications of a model system for monitoring rabies	o	0	1	0	1	0	1	1	1	1	0	0	0	2007
69	1	2007-03-01	78	A pedigree-analysis approach to the descriptive epidemiology of autosomal- recessive disorders	o	0	0	0	0	0	0	0	1	0	0	0	0	2007
70	1	2007-03-01	78	Interpretation of California mastitis test scores using Staphylococcus aureus culture results for screening of subclinical mastitis in low yielding smallholder dairy cows in the Dar es Salaam region of Tanzania	l	0	1	0	0	0	0	0	1	0	0	0	0	2007
71	1	2007-03-01	78	Risk factors associated with sero-positivity to Toxoplasma gondii in captive neotropical felids from Brazil	e	0	1	1	0	0	1	0	1	1	1	1	1	2007
72	1	2007-03-01	78	Maasai perception of the impact and incidence of malignant catarrhal fever (MCF) in southern Kenya	o	0	0	0	0	0	0	0	0	0	0	0	0	2007
73	1	2007-03-01	78	Infectious bronchitis virus serotypes in poultry flocks in Jordan	p	0	1	1	0	0	1	1	0	0	0	0	1	2007
74	1	2007-03-01	78	Prevalence of rabies virus infection and rabies antibody in stray dogs: A survey in Bangkok, Thailand	s	0	0	0	0	0	0	0	0	1	1	1	1	2007
75	1	2007-03-01	78	Variability in Holstein heifer heart-girth measurements and comparison of prediction equations for live weight	l	0	0	0	0	0	1	0	0	0	0	0	0	2007
76	1	2007-03-01	78	Tetracycline-resistance in lactose-positive enteric coliforms originating from Belgian fattening pigs: Degree of resistance, multiple resistance and risk factors	l	0	1	1	0	0	1	0	1	0	0	0	0	2007
77	1	2008-03-01	83	Transmission parameters of Mycobacterium avium subspecies paratuberculosis infections in a dairy herd going through a control program	l	1	1	1	0	0	1	0	1	0	0	0	0	2008
78	1	2008-03-01	83	A survey on biosecurity and management practices in Belgian pig herds	l	0	1	0	0	0	1	0	1	0	0	0	0	2008
79	1	2008-03-01	83	Parameter estimation and simulations of a mathematical model of Corynebacterium pseudotuberculosis transmission in sheep	l	1	1	0	1	1	1	0	0	0	1	1	1	2008
80	1	2008-03-01	83	Survivability and causes of loss of broody-hen chicks on smallholder households in Bangladesh	p	0	0	0	0	0	0	0	0	1	0	1	0	2008
81	1	2008-03-01	83	A cross-sectional study of the prevalence and associated risk factors for capped hock and the associations with bursitis in weaner, grower and finisher pigs from 93 commercial farms in England	l	0	1	1	0	1	1	1	0	0	0	1	0	2008
82	1	2008-03-01	83	Self-clearance from BVDV infections—A frequent finding in dairy herds in an endemically infected region in Peru	l	0	1	1	0	0	1	0	1	0	0	1	0	2008
83	1	2008-03-01	83	Factors associated with the incidence of bacterial gill disease in salmonid lots reared in Ontario, Canada government hatcheries	a	0	0	1	0	1	1	0	1	0	0	1	0	2008
84	1	2008-03-01	83	A cross-sectional study of the prevalence and associated risk factors for bursitis in weaner, grower and finisher pigs from 93 commercial farms in England	l	0	1	1	0	0	1	1	1	0	0	1	0	2008
85	1	2008-03-01	83	Salmonella in Belgian laying hens: An identification of risk factors	p	0	1	1	1	1	1	1	1	0	1	1	1	2008
86	1	2008-03-01	83	Towards incorporating spatial risk analysis for Salmonella sero-positivity into the Danish swine surveillance programme	l	0	1	0	0	0	1	0	1	1	1	1	1	2008
87	1	2008-03-01	83	Simulation modeling to evaluate the persistence of Mycobacterium avium subsp. paratuberculosis (MAP) on commercial dairy farms in the United States	l	0	1	1	1	0	0	0	0	0	0	0	0	2008
88	1	2008-03-01	83	Associations between sole ulcer, white line disease and digital dermatitis and the milk yield of 1824 dairy cows on 30 dairy cow farms in England and Wales from February 2003-November 2004	l	0	0	0	0	1	1	1	1	0	1	1	1	2008
89	1	2009-03-01	88	Using simple models to review the application and implications of different approaches used to simulate transission of pathogens among aquatic animals	a	0	0	0	0	1	0	0	0	0	0	0	0	2009
90	1	2009-03-01	88	Targeted badger removal and the subsequent risk of bovine tuberculosis in cattle herds in county Laois, Ireland	l	0	1	1	0	1	1	0	1	0	0	1	0	2009
91	1	2009-03-01	88	Associations between reported on-farm antimicrobial use practices and observed antimicrobial resistance in generic fecal Escherichia coli isolated from Alberta finishing swine farms	l	0	1	1	0	1	1	1	1	0	0	1	0	2009
92	1	2009-03-01	88	Analysis of morbidity and mortality data in riding school horses, with special regard to locomotor problems	h	0	1	0	0	0	1	0	1	0	1	1	0	2009
93	1	2009-03-01	88	Equine West Nile virus disease occurrence and the Normalized Difference Vegetation Index	h	1	1	0	0	1	1	0	0	0	0	0	0	2009
94	1	2009-03-01	88	The relationship between porcine circovirus 2 antigen score and antibody titre and histology of lymph nodes in 375 euthanased sick and healthy pigs from 113 British pig farms with and without postweaning multisystemic wasting syndrome	l	0	1	1	0	1	1	1	1	0	1	1	0	2009
95	1	2010-03-01	93	A stochastic mathematical model of the within-herd transmission dynamics of porcine reproductive and respiratory syndrome virus (PRRSV): Fade-out and persistence	l	0	0	0	0	0	0	0	0	0	0	0	0	2010
96	1	2010-03-01	93	Spatial and phylogenetic analysis of vesicular stomatitis virus over-wintering in the United States	o	1	1	1	1	1	1	1	1	0	0	0	0	2010
97	1	2010-03-01	93	Modelling collective effectiveness of voluntary vaccination with and without incentives	o	0	0	0	0	0	0	0	0	0	0	0	0	2010
98	1	2010-03-01	93	Perceptions, circumstances and motivators that influence implementation of zoonotic control programs on cattle farms	l	0	1	1	0	1	1	0	0	0	0	1	0	2010
99	1	2010-03-01	93	An economic decision support tool for simulating paratuberculosis control strategies in a UK suckler beef herd	l	0	0	0	0	0	0	0	0	0	0	0	0	2010
100	1	2010-03-01	93	Financial consequences of the Dutch bluetongue serotype 8 epidemics of 2006 and 2007	o	0	0	0	0	0	0	0	1	0	0	0	0	2010
101	1	2010-03-01	93	Susceptibility to paratuberculosis infection in cattle is associated with single nucleotide polymorphisms in Toll-like receptor 2 which modulate immune responses against Mycobacterium avium subspecies paratuberculosis	l	0	1	1	0	1	1	1	1	1	1	0	1	2010
102	1	2010-03-01	93	Comparison of three alternative methods for analysis of equine Faecal Egg Count Reduction Test data	h	0	0	0	0	0	0	0	0	1	1	1	1	2010
103	1	2011-03-01	98	Epidemiology and management of a bovine brucellosis cluster in Northern Ireland	l	0	1	0	0	1	1	0	1	1	1	0	0	2011
104	1	2011-03-01	98	Bayesian analysis of animal movements related to factors at herd and between herd levels: Implications for disease spread modeling	l	0	0	0	0	0	1	0	0	0	0	0	0	2011
105	1	2011-03-01	98	Efficacy of the Boar-Operated-System to deliver baits to feral swine	l	0	1	0	0	1	0	0	0	0	0	0	0	2011
106	1	2011-03-01	98	A meta-analysis comparing the effect of PCV2 vaccines on average daily weight gain and mortality rate in pigs from weaning to slaughter	l	0	1	1	0	1	1	1	1	0	0	1	0	2011
107	1	2011-03-01	98	Assessing biosecurity practices, movements and densities of poultry sites across Belgium, resulting in different farm risk-groups for infectious disease introduction and spread	p	0	0	0	0	0	0	0	0	0	0	0	0	2011
108	1	2011-03-01	98	Risk factors for Listeria monocytogenes contamination in French laying hens and broiler flocks	p	0	1	1	1	1	1	0	1	1	1	1	0	2011
109	1	2012-03-01	103	Effect of a difficult calving on the vigour of the calf, the onset of maternal behaviour, and some behavioural indicators of pain in the dam	l	1	1	1	0	1	0	0	1	0	1	1	0	2012
110	1	2012-03-01	103	Factors affecting dystocia and offspring vigour in different sheep genotypes	l	1	1	1	0	1	1	1	1	0	0	0	0	2012
111	1	2012-03-01	103	Bovine respiratory disease: Efficacy of different prophylactic treatments in veal calves and antimicrobial resistance of isolated Pasteurellaceae	l	0	1	0	0	1	0	0	0	0	0	0	0	2012
112	1	2012-03-01	103	Technical note: Development and testing of a radio transmission pH measurement system for continuous monitoring of ruminal pH in cows	l	1	1	0	0	0	1	0	0	0	0	0	0	2012
113	1	2012-03-01	103	Risk factors for displaced abomasum or ketosis in Swedish dairy herds	l	1	1	1	0	0	0	1	1	0	1	1	0	2012
114	1	2012-03-01	103	Natural antibodies related to metabolic and mammary health in dairy cows	l	1	1	1	0	0	0	0	1	0	0	0	0	2012
115	1	2012-03-01	103	Influence of a marine algae supplementation on the oxidative status of plasma in dairy cows during the periparturient period	l	0	1	1	0	1	1	1	1	0	0	0	0	2012
116	1	2013-03-01	108	Conceptual evaluation of population health surveillance programs: Method and example	o	0	0	0	0	0	0	0	1	0	0	0	0	2013
117	1	2013-03-01	108	Epidemiologic and economic evaluation of risk-based meat inspection for bovine cysticercosis in Danish cattle	l	0	0	0	0	0	0	0	1	0	1	1	1	2013
118	1	2013-03-01	108	Stochastic spatio-temporal modelling of African swine fever spread in the European Union during the high risk period	l	0	0	0	0	0	0	0	0	0	0	0	0	2013
119	1	2013-03-01	108	Estimation of the reproduction ratio (R0) of bluetongue based on serological field data and comparison with other BTV transmission models	o	0	1	0	0	1	1	0	1	0	0	0	0	2013
120	1	2013-03-01	108	A comparison of modelling approaches to assess the transmission of pathogens between Scottish fish farms: The role of hydrodynamics and site biomass	a	0	1	0	0	0	0	0	0	0	0	0	0	2013
121	1	2013-03-01	108	The interaction of host genetics and disease processes in chronic livestock disease: A simulation model of ovine footrot	l	0	1	0	1	1	1	0	1	0	0	0	0	2013
122	1	2013-03-01	108	Risk factors for subclinical intramammary infection in dairy goats in two longitudinal field studies evaluated by Bayesian logistic regression	l	0	0	0	0	1	1	0	1	0	0	1	0	2013
123	1	2013-03-01	108	Quantitative versus qualitative approaches: A comparison of two research methods applied to identification of key health issues for working horses in Lesotho	h	0	0	0	0	0	0	0	0	0	1	1	0	2013
124	1	2013-03-01	108	Determinants of biosecurity behaviour of British cattle and sheep farmers—A behavioural economics analysis	l	0	0	0	0	1	1	0	1	0	0	0	0	2013
125	1	2013-03-01	108	Possible impact of the “yellow card” antimicrobial scheme on meat inspection lesions in Danish finisher pigs	l	1	1	1	0	0	1	0	1	0	0	0	0	2013
126	1	2014-03-01	113	Impact of foot-and-mouth disease on pork and chicken prices in Central Luzon, Philippines	m	0	0	0	0	0	1	1	0	0	0	0	0	2014
127	1	2014-03-01	113	An integrated web system to support veterinary activities in Italy for the management of information in epidemic emergencies	o	0	0	0	0	0	0	0	0	0	0	0	0	2014
128	1	2014-03-01	113	Mining free-text medical records for companion animal enteric syndrome surveillance	s	0	0	0	0	0	0	0	0	1	1	1	0	2014
129	1	2014-03-01	113	Economic impacts of adoption and fundraising strategies in animal shelters	o	1	1	1	0	1	0	0	1	0	0	0	0	2014
130	1	2014-03-01	113	Evidence for widespread Leishmania infantum infection among wild carnivores in L. infantum periendemic northern Spain	e	0	1	1	0	0	1	0	0	0	0	1	0	2014
131	1	2014-03-01	113	How do resources influence control measures during a simulated outbreak of foot and mouth disease in Australia?	o	0	1	1	0	0	1	1	1	0	0	0	0	2014
132	1	2014-03-01	113	Wildlife–livestock interactions in a western rangeland setting: Quantifying disease-relevant contacts	m	0	1	1	0	0	0	1	0	0	0	0	0	2014
133	1	2014-03-01	113	Whirling disease dynamics: An analysis of intervention strategies	o	0	0	0	0	0	0	0	1	1	1	0	0	2014
134	1	2014-03-01	113	Risk assessment and cost-effectiveness of animal health certification methods for livestock export in Somalia	l	0	0	0	0	0	0	0	0	0	0	0	0	2014
135	1	2014-03-01	113	Use of monthly collected milk yields for the detection of the emergence of the 2007 French BTV epizootic	o	0	0	0	0	0	0	0	0	0	0	0	0	2014
136	1	2014-03-01	113	Economic risk analysis model for bovine viral diarrhea virus biosecurity in cow-calf herds	l	0	0	0	0	0	1	1	0	0	1	1	0	2014
137	1	2014-03-01	113	Prevalence and risk factors of Coxiella burnetii seropositivity in Danish beef and dairy cattle at slaughter adjusted for test uncertainty	l	0	0	0	0	1	1	0	1	0	0	0	0	2014
138	1	2014-03-01	113	Effect of carryover and presampling procedures on the results of real-time PCR used for diagnosis of bovine intramammary infections with Streptococcus agalactiae at routine milk recordings	l	0	0	1	0	1	1	0	1	0	1	1	1	2014
139	1	2014-03-01	113	Cost-effectiveness of diagnostic strategies using quantitative real-time PCR and bacterial culture to identify contagious mastitis cases in large dairy herds	l	0	0	0	0	0	0	0	0	1	1	1	0	2014
140	1	2014-03-01	113	Predictive qualitative risk model of bovine rabies occurrence in Brazil	l	0	1	0	0	0	0	1	0	0	1	0	0	2014
141	1	2014-03-01	113	Accuracy of the composite somatic cell count to detect intra-mammary infection in dairy cows using latent class analysis	l	0	0	0	0	0	0	0	0	0	0	0	0	2014
142	1	2014-03-01	113	Effects of quarter individual and conventional milking systems on teat condition	l	0	1	1	0	1	1	1	1	0	1	1	0	2014
143	1	2014-03-01	113	Import risk assessment incorporating a dose–response model: Introduction of highly pathogenic porcine reproductive and respiratory syndrome into Australia via illegally imported raw pork	l	0	0	1	0	0	0	0	0	0	1	0	0	2014
144	1	2014-03-01	113	Occurrence and severity of lung lesions in slaughter pigs vaccinated against Mycoplasma hyopneumoniae with different strategies	l	1	1	1	0	1	1	0	1	0	0	0	0	2014
145	1	2014-03-01	113	Establishment of serological herd profiles for zoonoses and production diseases in pigs by “meat juice multi-serology”	l	0	0	0	0	0	0	0	0	0	1	1	0	2014
146	1	2014-03-01	113	Assessing the risk of highly pathogenic avian influenza H5N1 transmission through poultry movements in Bali, Indonesia	p	0	1	1	0	0	1	0	1	0	0	0	0	2014
147	1	2014-03-01	113	Estimation of roaming dog populations in Timor Leste	s	0	0	0	0	0	0	0	0	0	0	0	1	2014
148	1	2015-03-01	118	Financial analysis of brucellosis control for small-scale goat farming in the Bajío region, Mexico	l	0	0	0	0	0	0	0	0	1	0	0	0	2015
149	1	2015-03-01	118	Standardized analysis of German cattle mortality using national register data	l	0	1	1	0	1	1	0	1	0	1	1	1	2015
150	1	2015-03-01	118	Prioritisation of wildlife pathogens to be targeted in European surveillance programmes: Expert-based risk analysis focus on ruminants	l	0	0	0	0	0	0	1	1	0	0	0	0	2015
151	1	2015-03-01	118	Evaluating the cost implications of a radio frequency identification feeding system for early detection of bovine respiratory disease in feedlot cattle	l	0	0	0	0	0	0	0	0	0	0	1	0	2015
152	1	2015-03-01	118	Analysis of pig movements across eastern Indonesia, 2009–2010	l	0	1	0	0	0	0	0	0	0	0	0	0	2015
153	1	2015-03-01	118	Assessment of l-lactatemia as a predictor of respiratory disease recognition and severity in feedlot steers	l	0	1	1	0	1	1	0	1	1	1	1	0	2015
154	1	2015-03-01	118	A description of smallholder pig production systems in eastern Indonesia	l	1	1	0	0	1	1	0	0	0	0	0	0	2015
155	1	2015-03-01	118	From network analysis to risk analysis—An approach to risk-based surveillance for bovine tuberculosis in Minnesota, US	l	0	0	0	0	0	1	0	0	0	1	1	0	2015
156	1	2015-03-01	118	Measuring general animal health status: Development of an animal health barometer	o	0	0	1	0	0	1	1	1	0	0	1	0	2015
157	1	2015-03-01	118	Economic analysis of vaccination to control bovine brucellosis in the States of Sao Paulo and Mato Grosso, Brazil	l	0	0	0	0	0	0	0	1	0	0	1	0	2015
158	1	2015-03-01	118	Preliminary molecular epidemiological investigation of hepatitis E virus sequences from Québec, Canada	o	1	1	1	1	1	1	0	0	0	0	0	0	2015
159	1	2015-03-01	118	Unravelling the temporal association between lameness and body condition score in dairy cattle using a multistate modelling approach	l	0	0	1	0	0	1	1	1	0	1	1	0	2015
160	1	2015-03-01	118	A field investigation into a suspected outbreak of pyrrolizidine alkaloid toxicosis in horses in western Queensland	h	0	1	1	1	0	0	0	1	0	0	1	0	2015
161	1	2015-03-01	118	Cross-sectional study of brucellosis in Jordan: Prevalence, risk factors and spatial distribution in small ruminants and cattle	l	0	1	1	0	1	1	0	1	1	1	1	1	2015
162	1	2015-03-01	118	Dog ownership, abundance and potential for bat-borne rabies spillover in Chile	s	0	0	1	0	1	1	1	1	0	0	1	0	2015
163	1	2015-03-01	118	Cryptosporidium parvum infection and associated risk factors in dairy calves in western France	l	1	1	1	1	1	1	1	1	1	0	1	0	2015
164	1	2015-03-01	118	Simulation of between-farm transmission of porcine reproductive and respiratory syndrome virus in Ontario, Canada using the North American Animal Disease Spread Model	l	0	0	0	0	0	0	0	1	0	0	0	1	2015
165	1	2015-03-01	118	Coxiella burnetii seroprevalence and associated risk factors in dairy and mixed cattle farms from Ecuador	l	0	1	1	0	0	1	1	0	0	0	1	1	2015
166	1	2015-03-01	118	Comparison of mark-resight methods to estimate abundance and rabies vaccination coverage of free-roaming dogs in two urban areas of south Bhutan	s	1	1	0	0	1	0	0	1	1	1	1	1	2015
167	1	2015-03-01	118	Mediation analysis to estimate direct and indirect milk losses due to clinical mastitis in dairy cattle	l	0	0	0	0	0	1	0	1	0	1	1	0	2015
168	1	2015-03-01	118	Alternatives to the use of antimicrobial agents in pig production: A multi-country expert-ranking of perceived effectiveness, feasibility and return on investment	l	0	0	0	0	1	1	0	0	0	0	0	0	2015
169	1	2015-03-01	118	Effect of vaccination against bovine herpesvirus 1 with inactivated gE-negative marker vaccines on the health of dairy cattle herds	l	1	1	1	1	1	1	0	1	1	1	1	1	2015
170	1	2016-03-01	125	Vector-borne disease surveillance in livestock populations: A critical review of literature recommendations and implemented surveillance (BTV-8) in five European countries	l	0	0	0	0	0	0	0	0	0	0	0	0	2016
171	1	2016-03-01	125	A modelling framework for predicting the optimal balance between control and surveillance effort in the local eradication of tuberculosis in New Zealand wildlife	e	0	0	0	0	0	0	0	0	0	0	0	1	2016
172	1	2016-03-01	125	Monitoring an epidemic of Theileria-associated bovine anaemia (Ikeda) in cattle herds in New Zealand	l	1	1	0	0	0	0	0	1	0	0	0	0	2016
173	1	2016-03-01	125	Effect of culling and vaccination on bovine tuberculosis infection in a European badger (Meles meles) population by spatial simulation modelling	e	0	0	0	0	0	0	0	1	0	0	0	0	2016
174	1	2016-03-01	125	Low prevalence of Salmonella in Swedish dairy herds highlight differences between serotypes	l	0	1	1	0	1	1	0	1	0	1	1	0	2016
175	1	2016-03-01	125	Randomized controlled trial on impacts of dairy meal feeding interventions on early lactation milk production in smallholder dairy farms of Central Kenya	l	0	1	1	0	0	1	0	1	0	0	0	0	2016
176	1	2016-03-01	125	Dam’s infection progress and within-herd prevalence as predictors of Mycobacterium avium subsp. paratuberculosis ELISA response in Danish Holstein cattle	l	0	0	1	0	0	0	0	1	0	1	1	0	2016
177	1	2016-03-01	125	A cross-sectional study of factors associated with birth weights of Norwegian beef calves	l	1	1	1	0	1	1	1	0	1	1	1	0	2016
178	1	2016-03-01	125	Associations between animal characteristic and environmental risk factors and bovine respiratory disease in Australian feedlot cattle	l	0	1	0	0	1	1	0	0	0	0	0	0	2016
179	1	2016-03-01	125	Impact of meteorological factors on the prevalence of porcine pasteurellosis in the southcentral of Mainland China	o	0	1	1	0	0	0	0	0	0	0	0	0	2016
180	1	2016-03-01	125	Prevalence and risk factors for foot and mouth disease infection in small ruminants in Israel	l	1	1	1	0	0	0	0	0	0	0	0	0	2016
181	1	2016-03-01	125	A cross-sectional study of 329 farms in England to identify risk factors for ovine clinical mastitis	l	0	1	1	0	1	1	1	1	1	1	1	0	2016
182	1	2016-03-01	125	Seroprevalence of Ehrlichia ruminantium antibodies and its associated risk factors in indigenous goats of South Africa	l	0	1	1	1	0	1	0	1	1	1	1	1	2016
183	1	2016-03-01	125	Circulating serovars of Leptospira in cart horses of central and southern Ethiopia and associated risk factors	h	0	1	1	0	1	1	0	1	0	1	1	0	2016
184	1	2016-03-01	125	Which dogs with appendicular osteosarcoma benefit most from chemotherapy after surgery? Results from an individual patient data meta-analysis	s	0	0	0	0	0	1	0	1	0	1	1	1	2016
185	1	2016-03-01	125	Chemotherapy effectiveness and mortality prediction in surgically treated osteosarcoma dogs: A validation study	s	1	0	0	0	0	1	1	0	1	1	1	1	2016
186	1	2016-03-01	125	Area contact networks and the spatio-temporal spread of infectious salmon anemia virus (ISAV) in Chile	a	0	1	1	0	0	1	1	1	0	0	0	0	2016
187	1	2016-03-01	125	Evidence and potential risk factors of tuberculosis among captive Asian elephants and wildlife staff in Peninsular Malaysia	e	1	1	1	1	1	1	0	1	1	1	1	0	2016
188	1	2017-03-01	138	Prevention of abortion in cattle following vaccination against bovine herpesvirus 1: A meta-analysis	l	0	1	0	0	0	1	0	1	0	1	0	0	2017
189	1	2017-03-01	138	Antimicrobial reduction measures applied in Danish pig herds following the introduction of the “Yellow Card” antimicrobial scheme	l	0	0	0	0	0	0	0	0	0	1	1	0	2017
190	1	2017-03-01	138	Economic consequences of paratuberculosis control in dairy cattle: A stochastic modeling study	l	0	0	0	0	0	1	0	1	0	0	0	0	2017
191	1	2017-03-01	138	Application of discrete choice experiment to assess farmers’ willingness to report swine diseases in the Red River Delta region, Vietnam	l	0	1	1	1	1	1	1	1	0	1	1	1	2017
192	1	2017-03-01	138	STARD-BLCM: Standards for the Reporting of Diagnostic accuracy studies that use Bayesian Latent Class Models	o	0	0	0	0	0	0	0	0	0	0	1	0	2017
193	1	2017-03-01	138	Assessing the time taken for a surveillance system to detect a re-emergence of bovine spongiform encephalopathy in cattle	l	0	0	0	0	0	0	0	1	0	0	0	0	2017
194	1	2017-03-01	138	Influenza A virus in swine breeding herds: Combination of vaccination and biosecurity practices can reduce likelihood of endemic piglet reservoir	l	0	0	0	0	0	0	0	1	0	0	0	0	2017
195	1	2017-03-01	138	Expanding veterinary biosurveillance in Washington, DC: The creation and utilization of an electronic-based online veterinary surveillance system	o	0	0	0	0	0	0	0	0	0	0	0	0	2017
196	1	2017-03-01	138	Epidemiological evaluation of cats rescued at a secondary emergency animal shelter in Miharu, Fukushima, after the Great East Japan Earthquakes	s	0	1	1	0	0	1	1	1	0	1	1	0	2017
197	1	2017-03-01	138	Meteorological conditions and land cover as predictors for the prevalence of Bluetongue virus in the Inner Mongolia Autonomous Region of Mainland China	o	0	1	0	0	1	0	0	1	0	0	0	0	2017
198	1	2017-03-01	138	Stochastic bio—economic modeling of mastitis in Ethiopian dairy farms	o	0	0	0	0	0	0	0	1	0	0	0	0	2017
199	1	2017-03-01	138	End-season daily weight gains as rationale for targeted selective treatment against gastrointestinal nematodes in highly exposed first-grazing season cattle	l	0	1	1	0	1	1	1	1	0	0	0	0	2017
200	1	2017-03-01	138	Unraveling the contact patterns and network structure of pig shipments in the United States and its association with porcine reproductive and respiratory syndrome virus (PRRSV) outbreaks	l	0	1	0	0	0	1	0	1	1	1	1	0	2017
201	1	2017-03-01	138	Ensemble modelling and structured decision-making to support Emergency Disease Management	o	0	0	0	0	0	0	0	0	0	0	0	0	2017
202	1	2017-03-01	138	Spatial-temporal cluster analysis of fatal Clostridium chauvoei cases among cattle in Styria, Austria between 1986 and 2013	l	0	0	1	0	0	0	0	0	0	0	0	0	2017
203	1	2017-03-01	138	Break-even analysis of costs for controlling Toxoplasma gondii infections in slaughter pigs via a serological surveillance program in the Netherlands	l	0	0	0	0	0	0	0	0	0	0	0	0	2017
204	1	2017-03-01	138	Estimation of the transmission parameters for swine influenza and porcine reproductive and respiratory syndrome viruses in pigs from weaning to slaughter under natural conditions	l	0	0	0	0	0	1	0	0	1	1	0	1	2017
205	1	2017-03-01	138	Epidemiological investigation of bovine tuberculosis outbreaks in Uruguay (2011–2013)	l	1	1	1	1	1	1	0	0	0	0	1	0	2017
206	1	2017-03-01	138	Non-inferiority of nitric oxide releasing intranasal spray compared to sub-therapeutic antibiotics to reduce incidence of undifferentiated fever and bovine respiratory disease complex in low to moderate risk beef cattle arriving at a commercial feedlot	o	1	1	0	0	1	1	1	0	0	0	1	0	2017
207	2	1997-09-01	32	The production system and disease incidence in a national random longitudinal study of Swiss dairy herds	l	0	0	0	0	0	1	0	0	0	0	0	0	1997
208	2	1997-09-01	32	Risk factors for bacterial gill disease in young rainbow trout (Oncorhynchus mykiss) in North America	a	0	1	1	0	1	1	0	1	1	0	1	0	1997
209	2	1997-09-01	32	Sensitivities and specificities of two ELISA tests for detecting infection with Sarcocystis in cattle of Western Australia	l	1	1	0	0	1	1	0	0	0	0	1	0	1997
210	2	1997-09-01	32	Helminthosis in local and cross-bred pigs in the Morogoro region of Tanzania	l	1	1	0	0	1	1	0	1	0	0	0	0	1997
211	2	1997-09-01	32	Risk factors associated with musculoskeletal injuries in Australian Thoroughbred racehorses	h	1	1	1	0	1	1	1	1	0	1	1	0	1997
212	2	1997-09-01	32	A simulation model for the spread of bovine tuberculosis within New Zealand cattle herds	l	0	0	0	0	0	0	0	0	0	0	0	0	1997
213	2	1997-09-01	32	Effect of different sampling techniques on odds ratio estimates using hospital-based cases and controls	o	0	1	1	1	0	1	0	1	0	1	1	1	1997
214	2	1997-09-01	32	Quantitative assessment of genomic similarity from restriction fragment patterns	o	0	1	0	0	0	0	0	0	0	0	1	0	1997
215	2	1997-09-01	32	A quantitative assessment of the risk of transmission of foot-and-mouth disease, bluetongue and vesicular stomatitis by embryo transfer in cattle	l	0	0	0	0	0	0	0	0	0	0	0	0	1997
216	2	1998-09-01	36	Investigating potential risk factors for seasonal variation: an example using graphical and spectral analysis methods based on the production of milk components in dairy cattle	l	0	1	1	0	0	1	1	0	0	0	0	0	1998
217	2	1998-09-01	36	Comparison of ELISA and 2-META assays used in serological diagnosis of infection with Actinobacillus pleuropneumoniae serotypes 2 and 4?7 in breeding pigs in Croatia	l	0	0	0	0	0	0	0	1	0	0	0	0	1998
218	2	1998-09-01	36	Herd-level test performance based on uncertain estimates of individual test performance, individual true prevalence and herd true prevalence	l	0	0	1	0	0	0	0	1	0	0	0	0	1998
219	2	1998-09-01	36	Evaluation of an indirect ELISA for the diagnosis of bovine brucellosis in milk and serum samples in dairy cattle in Argentina	l	0	0	0	0	0	0	0	0	1	1	0	0	1998
220	2	1998-09-01	36	An epidemiological and economic simulation model to evaluate the spread and control of infectious bovine rhinotracheitis in the Netherlands	l	0	0	0	0	0	1	0	0	0	0	0	0	1998
221	2	1999-09-01	42	Spatial and temporal distribution of selected canine cancers in Michigan, USA, 1964-1994	s	1	0	1	1	1	1	1	1	0	0	0	0	1999
222	2	1999-09-01	42	Predicting the effect of vaccination on the transmission dynamics of heartwater (Cowdria ruminantium) infection	l	0	0	0	0	0	0	0	0	0	0	0	0	1999
223	2	1999-09-01	42	Influence of Trypanosoma evansi infection on milk yield of dairy cattle in northeast Thailand	l	0	1	1	0	1	1	0	1	0	0	0	0	1999
224	2	1999-09-01	42	The usage of veterinary antibacterial drugs for mastitis in cattle in Norway and Sweden during 1990-1997	l	0	0	0	0	0	0	0	0	0	0	0	0	1999
225	2	1999-09-01	42	Change in lameness risk estimates in piglets due to the modelling of herd-level variation	l	0	1	1	1	0	1	0	1	0	1	1	0	1999
226	2	2000-09-01	46	Graphical approaches to support the analysis of linear-multilevel models of lamb pre-weaning growth in Kolda (Senegal)	l	1	1	1	1	1	1	0	1	0	0	1	1	2000
227	2	2000-09-01	46	Retrospective analysis of trends and production factors associated with sow mortality on swine-breeding farms in USA	l	1	1	1	0	0	0	1	0	0	0	0	0	2000
228	2	2000-09-01	46	Risk factors for Brucella spp. infection in dairy cattle farms in Asmara, State of Eritrea	l	0	0	1	0	0	0	0	0	1	0	1	0	2000
229	2	2000-09-01	46	Antimicrobial-resistance trends in bacterial isolates from companion-animal community practice in the UK	s	0	1	0	0	1	1	1	1	0	0	0	0	2000
230	2	2000-09-01	46	Prevalence of intestinal pathogens in Danish finishing pig herds	l	0	1	0	0	0	1	0	0	0	0	1	1	2000
231	2	2001-09-01	51	Targeted screening of high-risk cattle populations for BSE to augment mandatory reporting of clinical suspects	l	0	1	0	0	0	1	0	0	0	0	1	0	2001
232	2	2001-09-01	51	Time to first calving and calving interval in bovine virus diarrhoea virus (BVDV) sero-converted dairy herds in Norway	l	0	1	0	0	0	1	0	0	0	1	1	0	2001
233	2	2001-09-01	51	Activities to address antimicrobial resistance in the United States	o	0				0				0				2001
234	2	2001-09-01	51	A survival analysis of trypanosomosis diagnostic-test performance under natural infection challenge	l	1	1		0	1	1		1	0	1		0	2001
235	2	2001-09-01	51	Farm-management and milking practices associated with the presence of Listeria monocytogenes in New York state dairy herds	l	1	1	1	0	1	0	0	1	0	0	1	0	2001
236	2	2001-09-01	51	An economic model to calculate farm-specific losses due to bovine respiratory disease in dairy heifers	l	0	0	0	0	0	0	0	0	0	0	0	0	2001
237	2	2001-09-01	51	Cost-efficient vaccination of foxes (Vulpes vulpes) against rabies and the need for a new baiting strategy	w	0	0	0	0	0	0	0	0	0	0	0	0	2001
238	2	2001-09-01	51	The generation and persistence of genetic variation in foot-and-mouth disease virus	o	0		0	0	0		0	0	0		0	0	2001
239	2	2001-09-01	51	An epidemiological analysis of a canine-biopsies database compiled by a diagnostic histopathology service	s	0	1	0	0	0	1	0	1	0	0	1	0	2001
240	2	2002-09-01	55	Diet and lifestyle variables as risk factors for chronic renal failure in pet cats	s	0	1	1	1	0	1	1	1	0	0	1	1	2002
241	2	2002-09-01	55	A computer simulation of the prevention of the transmission of Toxoplasma gondii on swine farms using a feline T. gondii vaccine	l	0	0	0	0	0	0	0	0	0	0	0	0	2002
242	2	2002-09-01	55	Generalised additive models and hierarchical logistic regression of lameness in dairy cows	l	0	0	0	0	1	1	0	1	0	0	0	0	2002
243	2	2002-09-01	55	A review of camel brucellosis	l	0	0	0	0	0	0	0	0	0	0	0	0	2002
244	2	2002-09-01	55	Management factors related to seroprevalences to bovine viral-diarrhoea virus, bovine-leukosis virus, Mycobacterium avium subspecies paratuberculosis, and Neospora caninum in dairy herds in the Canadian Maritimes	l	0	1	1	0	0	1	0	1	0	0	0	0	2002
245	2	2002-09-01	55	Expert opinions of strategies for milk fever control	l	0	0	1	0	0	1	0	0	0	0	0	0	2002
246	2	2002-09-01	55	Repeatability and prediction from a telephone questionnaire measuring diet and activity level in cats	s	0	0	0	0	0	0	0	0	1	1	1	0	2002
247	2	2002-09-01	55	Heritability and epidemiology of canine hip-dysplasia score and its components in Labrador retrievers in the United Kingdom	s	0	1	1	0	1	1	1	1	0	0	0	0	2002
248	2	2002-09-01	55	A survey of group-level antibiotic prescriptions in pig production in France	l	0	1	0	0	0	1	0	0	0	1	0	0	2002
249	2	2002-09-01	55	Chronic pleuritis in Danish slaughter pig herds	l	0	1	1	0	0	1	1	1	0	0	1	0	2002
250	2	2002-09-01	55	Direct production losses and treatment costs from bovine viral diarrhoea virus, bovine leukosis virus, Mycobacterium avium subspecies paratuberculosis, and Neospora caninum	l	0	0	0	0	0	0	0	1	0	0	0	0	2002
251	2	2003-09-01	60	Transmission and control implications of seroconversion to Maedi-Visna virus in Basque dairy-sheep flocks	l	0	1	1	0	0	1	0	1	0	1	1	0	2003
252	2	2003-09-01	60	Prevalence estimates for paratuberculosis adjusted for test variability using Bayesian analysis	l	0	0	0	0	1	1	1	1	1	1	0	1	2003
253	2	2003-09-01	60	Epidemiology of ovine brucellosis in Awassi sheep in Northern Jordan	l	0	1	1	0	0	1	1	0	0	1	1	0	2003
254	2	2003-09-01	60	Risk factors for fecal shedding of Salmonella from horses in a veterinary teaching hospital	h	1	1	1	1	1	1	0	1	0	0	1	0	2003
255	2	2003-09-01	60	Benefits of prophylactic gastropexy for dogs at risk of gastric dilatation-volvulus	s	0	0	0	0	0	0	0	0	1	1	1	0	2003
256	2	2003-09-01	61	Oral immunization using formalin-inactivated Actinobacillus pleuropneumoniae antigens entrapped in microspheres with aqueous dispersion polymers prepared using a co-spray drying process	o	0	1	1	0	0	0	1	0	0	0	0	0	2003
257	2	2003-09-01	61	Male, female and management risk factors for non-return to service in Dutch mares	h	0	1	0	0	1	1	0	1	0	0	1	1	2003
258	2	2003-09-01	61	Optimizing replacement of dairy cows: modeling the effects of diseases	l	0		0	0	1		0	0	0		0	0	2003
259	2	2003-09-01	61	A stochastic-modeling evaluation of the foot-and-mouth-disease survey conducted after the outbreak in Miyazaki, Japan in 2000	l	0	0	0	0	0	0	0	1	0	0	0	0	2003
260	2	2003-09-01	61	Application of phylogeny reconstruction and character-evolution analysis to inferring patterns of directional microbial transmission	m	0	1	0	0	1	1	0	1	0	0	0	0	2003
261	2	2004-08-01	65	The sensitivities and specificities of total plasma protein and plasma fibrinogen for the diagnosis of traumatic reticuloperitonitis in cattle	l	0	0	1	0	0	1	1	1	0	0	0	0	2004
262	2	2004-08-01	65	Spatial risk assessment of herd sero-status of Aujeszky's disease in a county in Hungary	l	0	0	1	0	1	0	0	0	0	0	1	0	2004
263	2	2004-08-01	65	Participatory diagnosis of a heat-intolerance syndrome in cattle in Tanzania and association with foot-and-mouth disease	l	0	1	1	0	0	1	0	1	0	1	1	0	2004
264	2	2004-08-01	65	Predicted quantitative effect of logistic slaughter on microbial prevalence	o	0	0	0	0	0	1	0	0	0	0	0	0	2004
265	2	2004-08-01	65	Salmonella Dublin infection in dairy cattle: risk factors for becoming a carrier	l	0	1	1	0	0	1	0	1	0	0	1	0	2004
266	2	2004-08-01	65	Risk factors for the herd-level bacteriologic prevalence of Salmonella in Belgian slaughter pigs	l	1	1	1	0	1	1	0	1	1	1	1	1	2004
267	2	2004-08-01	65	Comparison of management practices between Ohio, USA dairy farms participating in whole-herd Johne’s disease testing programs and those not participating	l	0	1	1	0	0	0	0	0	0	1	1	0	2004
268	2	2004-08-01	65	Herd-level seroprevalence and risk-mapping of bovine hypodermosis in Belgian cattle herds	l	0	1	1	0	0	1	0	1	1	1	1	0	2004
269	2	2004-08-01	65	Vaccination coverage and epidemiological parameters of the owned-dog population in Thungsong District, Thailand	s	0	0	1	0	0	1	0	0	1	1	1	0	2004
270	2	2005-09-01	70	Use of avilamycin for growth promotion and avilamycin-resistance among Enterococcus faecium from broilers in a matched case-control study in France	p	0	1	0	0	0	0	0	1	0	0	0	0	2005
271	2	2005-09-01	70	Risk factors for stillbirth and foetal mummification in four Brazilian swine herds	l	1	1	1	1	0	1	0	0	0	0	1	0	2005
272	2	2005-09-01	70	Prevalence of multidrug resistant (MDR) Salmonella in bovine dairy herds in western France	l	0	0	0	0	0	1	0	1	1	1	1	0	2005
273	2	2005-09-01	70	Prevalence of claw lesions in Norwegian dairy cattle housed in tie stalls and free stalls	l	0	0	1	0	1	1	0	1	0	0	1	0	2005
274	2	2005-09-01	70	Estimating the probability of freedom of classical swine fever virus of the East-Belgium wild-boar population	w	0	0	0	0	0	0	0	0	0	0	0	0	2005
275	2	2005-09-01	70	On the surveillance for animal diseases in small herds	o	0	0	0	0	0	0	0	1	0	0	0	0	2005
276	2	2005-09-01	70	Cost-effectiveness of measures to prevent classical swine fever introduction into The Netherlands	l	0	0	0	0	0	0	0	0	0	0	0	0	2005
277	2	2005-09-01	70	Herd-level factors associated with isolation of Salmonella in a multi-state study of conventional and organic dairy farms: I. Salmonella shedding in cows	l	0	1	1	1	0	1	1	1	1	0	1	1	2005
278	2	2005-09-01	70	Herd-level factors associated with isolation of Salmonella in a multi-state study of conventional and organic dairy farms: II. Salmonella shedding in calves	l	0	1	1	1	0	1	1	1	1	1	1	0	2005
279	2	2005-09-01	70	Investigations of cattle herd breakdowns with bovine tuberculosis in four counties of England and Wales using VETNET data	l	0	0	0	0	0	1	0	1	0	0	0	0	2005
280	2	2005-09-01	71	Sample size determination for estimation of the accuracy of two conditionally independent tests in the absence of a gold standard	o	0	0	0	0	0	0	0	0	0		1	1	2005
281	2	2005-09-01	71	Risk factors for digital dermatitis in dairy cows kept in cubicle houses in The Netherlands	l	0	0	1	1	0	1	0	0	0	0	1	0	2005
282	2	2005-09-01	71	Risk factors for interdigital dermatitis and heel erosion in dairy cows kept in cubicle houses in The Netherlands	l	0	1	1	1	0	1	0	1	0	0	1	0	2005
283	2	2005-09-01	71	Risk factors for hazard of release from Salmonella-control restriction on Swedish cattle farms from 1993 to 2002	l	0	1	0	0	0	1	0	1	1	0	1	0	2005
284	2	2005-09-01	71	Spatial distribution of Escherichia coli O157-positive farms in Scotland	l	0	0	0	0	1	1	0	1	0	0	0	0	2005
285	2	2005-09-01	71	Spatial relationship between Mycobacterium bovis strains in cattle and badgers in four areas in Ireland	m	0	1	1	1	0	1	0	1	0	0	0	0	2005
286	2	2005-09-01	71	The value of genetic information in selecting dairy replacements	l	0	0	0	0	0	0	0	0	0	0	1	0	2005
287	2	2005-09-01	71	Effects of host density on furunculosis epidemics determined by the simple SIR model	a	0	0	0	0	0	1	0	1	0	0	0	0	2005
288	2	2005-09-01	71	Evaluation of a French ELISA for the detection of Salmonella Enteritidis and Salmonella Typhimurium in flocks of laying and breeding hens	p	0	0	0	0	0	0	0	0	0	0	1	0	2005
289	2	2005-09-01	71	Effect of pathogen-specific clinical mastitis on herd life in two New York State dairy herds	l	1	1	1	1	1	1	1	1	0	0	1	0	2005
290	2	2006-09-01	76	A study of helminth parasites in culled cows from Ireland	l	0	1	1	0	0	1	0	1	0	0	1	1	2006
291	2	2006-09-01	76	Network analysis of Danish cattle industry trade patterns as an evaluation of risk potential for disease spread	l	0	0	0	0	0	0	0	0	0	0	0	0	2006
292	2	2006-09-01	76	Use of social network analysis to characterize the pattern of animal movements in the initial phases of the 2001 foot and mouth disease (FMD) epidemic in the UK	l	0	1	0	0	0	1	0	0	0	0	0	0	2006
293	2	2006-09-01	76	Bayesian estimation of sensitivity and specificity of serum ELISA and faecal culture for diagnosis of paratuberculosis in Greek dairy sheep and goats	l	0	0	1	1	0	0	0	1	0	0	0	0	2006
294	2	2006-09-01	76	On distinguishing cause and consequence: Do high somatic cell counts lead to lower milk yield or does high milk yield lead to lower somatic cell count?	l	0	0	0	0	1	1	0	0	0	0	0	0	2006
295	2	2006-09-01	76	Response of Trypanosoma vivax and Trypanosoma congolense in zebu cattle in North Cameroon to prophylactic treatment with two formulations of isometamidium	l	0	1	0	0	0	1	0	0	0	0	0	0	2006
296	2	2006-09-01	76	Persistence of infectious pancreatic necrosis virus (IPNV) in Scottish salmon (Salmo salar L.) farms	a	0	0	0	0	0	1	0	0	0	1	1	0	2006
297	2	2006-09-01	76	A description of cattle movements in two departments of Buenos Aires province, Argentina	l	0	0	0	0	0	0	0	1	0	1	0	1	2006
298	2	2006-09-01	76	Application of a semi-dependent latent model in the Bayesian estimation of the sensitivity and specificity of two faecal culture methods for diagnosis of paratuberculosis in sub-clinically infected Greek dairy sheep and goats	l	0	0	0	0	0	1	0	1	1	1	0	0	2006
299	2	2007-09-01	81	The application of risk analysis in aquatic animal health management	a	0		0	0	0		0	1	0	0	0	1	2007
300	2	2007-09-01	81	Exploring the role of auction markets in cattle movements within Great Britain	l	0	1	0	0	1	0	0	1	0	0	0	0	2007
301	2	2007-09-01	81	Evaluation of underlying risk as a source of heterogeneity in meta-analyses: A simulation study of Bayesian and frequentist implementations of three models	o	0	1	0	1	0	0	0	0	0	1	0	0	2007
302	2	2007-09-01	81	Application of portfolio theory to risk-based allocation of surveillance resources in animal populations	o	0	0	0	0	1	0	0	1	0	0	0	0	2007
303	2	2007-09-01	81	An evaluation of scrapie surveillance in the United States	o	0	0	0	0	0	0	0	0	0	0	0	0	2007
304	2	2007-09-01	81	A qualitative assessment tool for the potential of infectious disease emergence and spread	o	0	0	0	0	0	0	0	1	0	0	0	0	2007
305	2	2007-09-01	81	Global trade in ornamental fish from an Australian perspective: The case for revised import risk analysis and management strategies	a	0	0	0	0	1	1	0	1	0	0	0	0	2007
306	2	2007-09-01	81	UK surveillance: Provision of quality assured information from combined datasets	o	0	0	0	0	0	1	0	1	0	0	0	0	2007
307	2	2007-09-01	81	Clustering of parasites within cages on Scottish and Norwegian salmon farms: Alternative sampling strategies illustrated using simulation	a	0	1	1	0	1	1	1	1	1	0	1	0	2007
308	2	2007-09-01	81	Factors influencing the prevalence of Salmonella spp. in swine farms: A meta-analysis approach	l	0	1	1	0	0	1	0	1	0	0	0	0	2007
309	2	2007-09-01	81	Development of a method for Bayesian nonparametric ROC analysis with application to an ELISA for Johne's disease in dairy cattle	l	0	0	0	0	0	0	0	0	0	0	0	0	2007
310	2	2007-09-01	81	Development of methodology to prioritise wildlife pathogens for surveillance	w	0	0	0	0	0	0	0	1	0	0	0	0	2007
311	2	2008-09-01	86	Exploring the foundations of population health and preventive medicine as essential elements for veterinary education	o	0				0				0				2008
312	2	2008-09-01	86	Interface of epidemiology, pet population issues and policy	o	0		0		0		0		0		0		2008
313	2	2008-09-01	86	Disease and destiny-mystery and mastery	o	0				0				0				2008
314	2	2008-09-01	86	International programs and veterinary public health in the Americas--Success, challenges, and possibilities	o	0				0				0				2008
315	2	2008-09-01	86	Emerging zoonoses: The challenge for public health and biodefense	o	0				0				0				2008
316	2	2008-09-01	86	Veterinary public health: Past success, new opportunities	o	0				0				0				2008
317	2	2008-09-01	86	The use of epidemiology to enhance production animal research	o	0				0				0				2008
318	2	2008-09-01	86	The influence of veterinary epidemiology on public health: Past, present and future	o	0				1				0				2008
319	2	2008-09-01	86	Quantitative epidemiology: Progress and challenges	o	0		1		0		0		0		0		2008
320	2	2008-09-01	86	Linking causal concepts, study design, analysis and inference in support of one epidemiology for population health	o	0		0		0		0		0		0		2008
321	2	2009-09-01	91	Statistical approaches to the monitoring and surveillance of infectious diseases for veterinary public health	o	0		0	0	0		0	1	0		0	0	2009
322	2	2009-09-01	91	The impact of habitat fragmentation on tsetse abundance on the plateau of eastern Zambia	o	0	0	1	0	0	1	0	1	0	0	0	0	2009
323	2	2009-09-01	91	A novel approach to real-time risk prediction for emerging infectious diseases: A case study in Avian Influenza H5N1	o	0	0	0	0	0	0	0	1	0	0	0	0	2009
324	2	2009-09-01	91	Combined application of social network and cluster detection analyses for temporal-spatial characterization of animal movements in Salamanca, Spain	o	1	1	1	1	1	1	1	1	0	0	0	0	2009
325	2	2009-09-01	91	A web-based system for near real-time surveillance and space-time cluster analysis of foot-and-mouth disease and other animal diseases	m	0	1	0	0	0	1	0	1	0	0	0	0	2009
326	2	2009-09-01	91	Space-time Bayesian survival modeling of chronic wasting disease in deer	w	0	0	0	0	1	1	0	0	0	0	0	0	2009
327	2	2009-09-01	91	Modelling spread of foot-and-mouth disease in wild white-tailed deer and feral pig populations using a geographic-automata model and animal distributions	w	0	1	0	0	0	1	0	1	0	0	0	0	2009
328	2	2009-09-01	91	Simulation of the K-function in the analysis of spatial clustering for non-randomly distributed locations?Exemplified by bovine virus diarrhoea virus (BVDV) infection in Denmark	o	0	0		0	0	0		0	0	0		0	2009
329	2	2010-09-01	96	Control of cryptosporidiosis in neonatal calves: Use of halofuginone lactate in two different calf rearing systems	l	0	1	1	0	1	1	1	1	0	0	1	0	2010
330	2	2010-09-01	96	The association of winds with the spread of EHDV in dairy cattle in Israel during an outbreak in 2006	l	0	0	1	0	1	1	0	1	0	0	0	0	2010
331	2	2010-09-01	96	Detection of bovine tuberculosis in herds with different disease prevalence and influence of paratuberculosis infection on PPDB and ESAT-6/CFP10 specificity	l	0	1	0	0	1	1	0	0	0	1	1	0	2010
332	2	2010-09-01	96	Risk factors for abortion in dairy cows from commercial Holstein dairy herds in the Tehran region	l	0	1	1	0	1	1	1	1	0	0	1	0	2010
333	2	2010-09-01	96	Impact of livestock hygiene education programs on mastitis in smallholder water buffalo (Bubalus bubalis) in Chitwan, Nepal	l	1	1	1	0	1	1	1	1	1	1	1	0	2010
334	2	2010-09-01	96	A prospective study evaluating duration of swine breeding herd PRRS virus-free status and its relationship with measured risk	l	0	1	1	1	1	1	0	1	0	1	1	0	2010
335	2	2010-09-01	96	Influence of repeat-service and weaning-to-first-service interval on farrowing proportion of gilts and sows	l	1	1	0	0	0	1	0	1	0	0	0	0	2010
336	2	2010-09-01	96	Multi Criteria Decision Making to evaluate control strategies of contagious animal diseases	o	0	0	0	0	0	0	0	0	0	0	0	0	2010
337	2	2010-09-01	96	Eurasian wild boar response to skin-testing with mycobacterial and non-mycobacterial antigens	w	0	1	0	0	0	1	0	0	0	0	0	0	2010
338	2	2010-09-01	96	A "shotgun" method for tracing the birth locations of sheep from flock tags, applied to scrapie surveillance in Great Britain	l	0	1	1	0	0	1	1	0	0	1	1	1	2010
339	2	2010-09-01	96	Cross-sectional sero-epidemiological survey of sarcoptic mange in sheep of Western Castile and Leon, Spain	l	1	1	1	0	1	1	0	1	1	1	1	1	2010
340	2	2010-09-01	96	Evaluation of ELISA test characteristics and estimation of Toxoplasma gondii seroprevalence in Dutch sheep using mixture models	l	0	1	0	0	1	1	1	1	0	1	1	1	2010
341	2	2010-09-01	96	A case-control study of atypical scrapie in GB sheep flocks	l	0	1	1	1	1	1	1	1	0	0	0	0	2010
342	2	2010-09-01	96	Use of a Randomized Response Technique to obtain sensitive information on animal disease prevalence	o	0	1	0	1	0	1	0	1	0	0	0	0	2010
343	2	2010-09-01	96	Monitoring bluetongue disease (BTV-1) epidemic in southern Spain during 2007	l	1	1	0	0	1	1	0	1	0	0	0	0	2010
344	2	2011-09-01	101	The economic and poverty impacts of animal diseases in developing countries: New roles, new demands for economics and epidemiology	o	0		0		1		0		0		0		2011
345	2	2011-09-01	101	From "one medicine" to "one health" and systemic approaches to health and well-being	o	0				0				0				2011
346	2	2011-09-01	101	Factors associated with infection by Campylobacter fetus in beef herds in the Province of Buenos Aires, Argentina	l	0	1	1	0	0	1	1	1	1	0	1	0	2011
347	2	2011-09-01	101	Trends of selected cattle diseases in eastern Zambia between 1988 and 2008	l	0	0	0	0	1	0	0	1	0	0	0	0	2011
348	2	2011-09-01	101	Ruminant brucellosis in Upper Egypt (2005-2008)	l	0	1	0	0	0	1	0	1	1	1	1	0	2011
349	2	2011-09-01	101	Farm level risk factors associated with severity of post-weaning multi-systemic wasting syndrome	l	0	1	1	0	0	1	0	1	0	0	1	0	2011
350	2	2011-09-01	101	Longitudinal investigation of protozoan parasites in meat lamb farms in southern Western Australia	l	0	1	0	0	0	1	0	1	0	0	1	0	2011
351	2	2011-09-01	101	Factors associated with mortality of geriatric horses in the United Kingdom	h	0	0	1	0	0	1	0	1	1	1	1	0	2011
352	2	2011-09-01	101	Diagnostic and epidemiologic analysis of the 2008-2010 investigation of a multi-year outbreak of contagious equine metritis in the United States	h	0	0	0	0	0	1	0	1	0	0	0	0	2011
353	2	2011-09-01	101	Highly pathogenic avian influenza (H5N1) in ducks and in-contact chickens in backyard and smallholder commercial duck farms in Viet Nam	p	0	1	0	0	0	1	0	0	1	1	0	0	2011
354	2	2011-09-01	101	Evaluations of land cover risk factors for canine leptospirosis: 94 cases (2002-2009)	s	0	1	1	0	1	1	1	1	1	1	1	0	2011
355	2	2011-09-01	101	When cats' ways of life interact with their viruses: A study in 15 natural populations of owned and unowned cats (Felis silvestris catus)	s	0	0	1	0	0	0	0	0	0	0	1	0	2011
356	2	2012-09-01	106	Willingness to pay for compulsory deworming of pets entering Sweden to prevent introduction of Echinoccoccus multilocularis	s	0	1	1	0	0	1	0	1	0	1	1	0	2012
357	2	2012-09-01	106	Predictors of differences in the perception of antimicrobial resistance risk in the treatment of sick, at-risk, and high-risk feedlot cattle	l	0	0	1		0	1	1		0	0	0		2012
358	2	2012-09-01	106	Classical swine fever outbreak containment using antiviral supplementation: A potential alternative to emergency vaccination and stamping-out	l	0	0	0	0	0	1	0	1	0	1	0	1	2012
359	2	2012-09-01	106	Identifying questions in the American Association of Swine Veterinarian's PRRS risk assessment survey that are important for retrospectively classifying swine herds according to whether they reported clinical PRRS outbreaks in the previous 3 years	u	0	1	1	0	1	1	1	1	0	1	1	0	2012
360	2	2012-09-01	106	Prophylactic and metaphylactic antimicrobial use in Belgian fattening pig herds	l	0	0	0	0	0	0	0	0	0	0	0	0	2012
361	2	2012-09-01	106	Modelling transmission dynamics of paratuberculosis of red deer under pastoral farming conditions	w	0	0	0	0	0	0	0	0	0	1	0	0	2012
362	2	2012-09-01	106	A Bayesian elicitation of veterinary beliefs regarding systemic dry cow therapy: Variation and importance for clinical trial design	o	0	0	0	0	0	0	0	0	0	0	0	0	2012
363	2	2012-09-01	106	Horse owners'/managers' perceptions about effectiveness of biosecurity measures based on their experiences during the 2007 equine influenza outbreak in Australia	h	1	1	1	0	0	1	1	1	0	0	1	0	2012
364	2	2012-09-01	106	Risk of introducing African horse sickness virus into the Netherlands by international equine movements	h	0	0	0	0	0	0	0	0	0	0	0	0	2012
365	2	2012-09-01	106	Adding the spatial dimension to the social network analysis of an epidemic: Investigation of the 2007 outbreak of equine influenza in Australia	h	0	0	0	0	0	0	0	0	1	1	0	1	2012
366	2	2012-09-01	106	Modelling bovine babesiosis: A tool to simulate scenarios for pathogen spread and to test control measures for the disease	l	0	0	0	0	0	1	0	1	0	0	0	0	2012
367	2	2012-09-01	106	Estimating spatial and temporal variations of the reproduction number for highly pathogenic avian influenza H5N1 epidemic in Thailand	p	0	1	0	0	0	1	0	1	0	0	1	1	2012
368	2	2012-09-01	106	Bovine tuberculosis surveillance alternatives in Belgium	l	0	1	0	1	0	0	0	1	0	0	0	0	2012
369	2	2012-09-01	106	An economic model to evaluate the mitigation programme for bovine viral diarrhoea in Switzerland	l	0	0	0	0	0	0	1	0	0	0	0	0	2012
370	2	2012-09-01	106	Models to capture the potential for disease transmission in domestic sheep flocks	l	0	0	0	0	1	1	0	1	0	1	0	1	2012
371	2	2012-09-01	106	Disease severity declines over time after a wild boar population has been affected by classical swine fever--Legend or actual epidemiological process?	w	0	0	0	0	0	0	0	0	0	0	0	0	2012
372	2	2013-09-01	111	A framework for assessing the intangible impacts of emergency animal disease	o	0	0	0	0	0	0	0	0	0	0	0	0	2013
373	2	2013-09-01	111	Bayesian mixture models for partially verified data: Age- and stage-specific discriminatory power of an antibody ELISA for paratuberculosis	l	0	0	0	0	0	0	0	1	0	0	0	0	2013
374	2	2013-09-01	111	Comparing control strategies against foot-and-mouth disease: Will vaccination be cost-effective in Denmark?	l	0	0	0	0	0	1	0	0	0	0	0	0	2013
375	2	2013-09-01	111	Inventory of veterinary syndromic surveillance initiatives in Europe (Triple-S project): Current situation and perspectives	o	0	0	0	0	0	0	0	0	0	0	0	0	2013
376	2	2013-09-01	111	Schmallenberg virus in Italy: a retrospective survey in Culicoides stored during the bluetongue Italian surveillance program	o	0	0	0	0	0	0	0	1	0	0	1	0	2013
377	2	2013-09-01	111	Comparison of bovine tuberculosis recurrence in Irish herds between 1998 and 2008	l	1	1	1	0	1	1	0	1	1	1	1	1	2013
378	2	2013-09-01	111	Associations of herd- and cow-level factors, cow lying behavior, and risk of elevated somatic cell count in free-stall housed lactating dairy cows	l	0	1	1	0	0	0	0	0	0	0	1	0	2013
379	2	2013-09-01	111	Herd-level risk factors for Campylobacter fetus infection, Brucella seropositivity and within-herd seroprevalence of brucellosis in cattle in northern Nigeria	l	0	1	1	1	0	1	0	1	0	0	1	0	2013
380	2	2013-09-01	111	Financial implications of installing air filtration systems to prevent PRRSV infection in large sow herds	l	0	1	1	0	0	1	0	1	0	0	0	0	2013
381	2	2013-09-01	111	Analysis of the variation in meat inspection of pigs using variance partitioning	l	0	0	0	0	0	0	0	0	0	0	0	0	2013
382	2	2013-09-01	111	Impact of test sensitivity and specificity on pig producer incentives to control Mycobacterium avium infections in finishing pigs	l	0	0	0	0	0	0	0	0	0	0	0	0	2013
383	2	2013-09-01	111	Estimating the power of a Mycobacterium bovis vaccine trial in Irish badgers	w	0	0	0	0	0	0	0	0	0	0	0	0	2013
384	2	2013-09-01	111	Evaluation of the performance of cellular and serological diagnostic tests for the diagnosis of tuberculosis in an alpaca (Vicugna pacos) herd naturally infected with Mycobacterium bovis	l	0	1	0	0	0	1	0	1	1	1	1	1	2013
385	2	2014-09-01	116	Economic impact of foot and mouth disease outbreaks on smallholder farmers in Ethiopia	l	1	1	1	0	0	1	0	1	0	0	0	0	2014
386	2	2014-09-01	116	Estimation of the probability of freedom from Bovine virus diarrhoea virus in Norway using scenario tree modelling	l	0	0	0	0	0	0	0	0	0	0	0	0	2014
387	2	2014-09-01	116	Bovine tuberculosis in Northern Ireland: Risk factors associated with time from post-outbreak test to subsequent herd breakdown	l	1	1	1	1	1	1	1	1	0	1	1	1	2014
388	2	2014-09-01	116	Bovine herpesvirus type 1 marker vaccine induces cross-protection against bubaline herpesvirus type 1 in water buffalo	l	0	1	0	1	1	1	0	1	0	0	0	0	2014
389	2	2014-09-01	116	A quantitative risk assessment of bovine theileriosis entering Luapula Province from Central Province in Zambia via live cattle imports from traditional and commercial production sectors	l	0	0	0	1	0	0	0	1	0	1	0	0	2014
390	2	2014-09-01	116	Quantitative assessment of the risk of introduction of bovine viral diarrhea virus in Danish dairy herds	l	0	0	0	0	0	0	0	0	0	0	1	0	2014
391	2	2014-09-01	116	Exploring cattle movements in Belgium	l	0	1	0	0	1	1	0	1	0	1	1	0	2014
392	2	2014-09-01	116	Risk factors associated with leg disorders of gestating sows in different group-housing systems: A cross-sectional study in 108 farrow-to-finish farms in France	l	0	1	1	1	1	1	0	1	1	1	1	0	2014
393	2	2014-09-01	116	Comparison of time to PRRSv-stability and production losses between two exposure programs to control PRRSv in sow herds	l	0	1	1	0	1	1	1	1	0	0	0	0	2014
394	2	2014-09-01	116	Risk factors associated with persistence of Salmonella shedding in finishing pigs	l	0	1	1	0	1	1	0	1	0	1	1	0	2014
395	2	2014-09-01	116	Prevalence and potential risk factors for the occurrence of cefotaxime resistant Escherichia coli in German fattening pig farms—A cross-sectional study	l	1	1	1	0	0	1	0	1	1	1	1	0	2014
396	2	2014-09-01	116	Sero-prevalence and associated risk factors of peste des petits ruminants and contagious caprine pleuro-pneumonia in goats and sheep in the Southern Zone of Tanzania	l	1	1	1	0	1	1	0	1	1	0	1	0	2014
397	2	2014-09-01	116	The development of poultry farms risk assessment tool for avian influenza in Imo State, Nigeria	p	0	1	1	0	0	1	0	1	0	0	0	0	2014
398	2	2014-09-01	116	Identifying risk factors of avian infectious diseases at household level in Poyang Lake region, China	l	1	1	1	0	1	1	1	0	1	1	1	0	2014
399	2	2014-09-01	116	Development of an active risk-based surveillance strategy for avian influenza in Cuba	p	0	0	0	0	0	0	0	0	0	0	0	0	2014
400	2	2014-09-01	116	Improving early detection of exotic or emergent oyster diseases in France: Identifying factors associated with shellfish farmer reporting behaviour of oyster mortality	a	0	1	1	1	0	0	0	1	0	0	0	0	2014
401	2	2015-09-01	121	Investigating the potential of reported cattle mortality data in Switzerland for syndromic surveillance	l	0	0	0	0	0	1	0	1	0	0	0	0	2015
402	2	2015-09-01	121	Risk-based testing of imported animals: A case study for bovine tuberculosis in The Netherlands	l	0	0	0	0	0	0	0	0	0	0	0	0	2015
403	2	2015-09-01	121	Comparison of output-based approaches used to substantiate bovine tuberculosis free status in Danish cattle herds	l	0	0	0	0	0	0	0	0	0	0	0	0	2015
404	2	2015-09-01	121	Factors affecting dairy farmers’ attitudes towards antimicrobial medicine usage in cattle in England and Wales	l	0	1	1	0	1	1	0	1	0	0	0	1	2015
405	2	2015-09-01	121	Epidemiology and impact of Fasciola hepatica exposure in high-yielding dairy herds	l	1	1	1	0	1	1	1	1	0	1	1	1	2015
406	2	2015-09-01	121	Herd-level prevalence and associated risk factors for Mycobacterium avium subsp. paratuberculosis in cattle in the State of Paraíba, Northeastern Brazil	l	0	1	1	0	0	0	0	1	1	1	1	1	2015
407	2	2015-09-01	121	Spatial distribution of Brucella antibodies with reference to indigenous cattle populations among contrasting agro-ecological zones of Uganda	l	1	1	1	0	1	1	1	1	1	1	1	0	2015
408	2	2015-09-01	121	Investigation of the association between the test day milk fat–protein ratio and clinical mastitis using a Poisson regression approach for analysis of time-to-event data	l	0	0	1	0	0	1	0	1	0	1	1	0	2015
409	2	2015-09-01	121	Prevalence and concentration of Escherichia coli O157 in different seasons and cattle types processed in North America: A systematic review and meta-analysis of published research	l	0	1	1	0	1	1	0	1	1	1	1	0	2015
410	2	2015-09-01	121	Effect of the inoculation site of bovine purified protein derivative (PPD) on the skin fold thickness increase in cattle from officially tuberculosis free and tuberculosis-infected herds	l	0	0	0	0	0	0	0	1	0	1	1	0	2015
411	2	2015-09-01	121	Testing Eurasian wild boar piglets for serum antibodies against Mycobacterium bovis	w	0	1	0	0	0	1	1	0	0	0	1	0	2015
412	2	2015-09-01	121	Impact of particulate matter and ammonia on average daily weight gain, mortality and lung lesions in pigs	l	1	1	1	0	1	1	1	1	0	0	1	0	2015
413	2	2015-09-01	121	Number of pigs born alive in parity 1 sows associated with lifetime performance and removal hazard in high- or low-performing herds in Japan	l	1	1	1	0	0	1	1	0	0	0	1	0	2015
414	2	2015-09-01	121	Economic aspects of Q fever control in dairy goats	l	0	0	0	0	0	0	0	0	0	1	0	0	2015
415	2	2015-09-01	121	A cooperative approach to animal disease response activities: Analytical hierarchy process (AHP) and vvIBD in California poultry	p	0	0	0	0	0	0	0	1	0	0	0	0	2015
416	2	2015-09-01	121	Space–time modelling of the spread of pancreas disease (PD) within and between Norwegian marine salmonid farms	a	0	0	0	0	0	1	0	0	0	1	1	0	2015
417	2	2015-09-01	121	Controlling highly pathogenic avian influenza outbreaks: An epidemiological and economic model analysis	p	0	0	0	0	0	0	0	0	0	0	1	0	2015
418	2	2015-09-01	121	Human campylobacteriosis related to the consumption of raw milk sold by vending machines in Italy: Quantitative risk assessment based on official controls over four years	o	0	0	0	0	0	0	0	0	0	0	0	0	2015
419	2	2015-09-01	121	Deer response to exclusion from stored cattle feed in Michigan, USA	w	0	0	0	0	0	1	0	0	0	0	0	0	2015
420	2	2016-09-01	131	Bovine tuberculosis in Northern Ireland: Risk factors associated with duration and recurrence of chronic herd breakdowns	l	0	0	1	0	1	1	0	1	0	1	1	1	2016
421	2	2016-09-01	131	Transmission dynamics of extended-spectrum β-lactamase and AmpC β-lactamase-producing Escherichia coli in a broiler flock without antibiotic use	p	1	1	1	0	0	1	0	0	1	1	1	0	2016
422	2	2016-09-01	131	Use of Bayesian Belief Network techniques to explore the interaction of biosecurity practices on the probability of porcine disease occurrence in Canada	l	0	1	0	0	0	1	0	1	0	0	0	1	2016
423	2	2016-09-01	131	Herd-level risk factors for bovine tuberculosis in French cattle herds	l	0	0	0	0	0	1	0	1	0	1	1	1	2016
424	2	2016-09-01	131	A register-based study of the antimicrobial usage in Danish veal calves and young bulls	l	0	1	1	0	0	1	1	1	0	0	1	0	2016
425	2	2016-09-01	131	Quantitative analysis of the probability of introducing equine encephalosis virus (EEV) into The Netherlands	h	0	0	0	0	0	0	0	0	0	0	0	0	2016
426	2	2016-09-01	131	Detection and quantification of Cryptosporidium oocysts in environmental surfaces of an Equine Perinatology Unit	h	0	1	0	0	0	1	0	1	0	1	0	0	2016
427	2	2016-09-01	131	Effect of feeding sodium butyrate in the late finishing period on Salmonella carriage, seroprevalence, and growth of finishing pigs	l	1	1	1	0	1	1	1	1	0	0	0	0	2016
428	2	2016-09-01	131	Factors influencing common diagnoses made during first-opinion small-animal consultations in the United Kingdom	s	0	1	1	0	0	1	1	0	0	0	0	0	2016
429	2	2016-09-01	131	Key management practices to prevent high infestation levels of Varroa destructor in honey bee colonies at the beginning of the honey yield season	o	0	1	1	0	1	1	1	1	0	0	1	0	2016
430	2	2016-09-01	131	Effect of cognitive enrichment on behavior, mucosal immunity and upper respiratory disease of shelter cats rated as frustrated on arrival	s	0	1	1	0	0	1	0	0	1	1	0	0	2016
431	2	2016-09-01	131	The costs of preventive activities for exotic contagious diseases—A Danish case study of foot and mouth disease and swine fever	l	0	0	0	0	0	0	0	0	0	0	0	0	2016
432	2	2016-09-01	131	The attitudes of owners and veterinary professionals in the United Kingdom to the risk of adverse events associated with using non-steroidal anti-inflammatory drugs (NSAIDs) to treat dogs with osteoarthritis	s	0	0	0	0	0	0	0	0	0	0	0	0	2016
433	2	2016-09-01	131	Rabies disease dynamics in naïve dog populations in Australia	s	0	1	0	0	1	1	0	0	0	0	0	0	2016
434	2	2016-09-01	131	Prevalence, survival analysis and multimorbidity of chronic diseases in the general veterinarian-attended horse population of the UK	h	0	0	1	0	1	0	0	1	0	0	1	0	2016
435	2	2016-09-01	132	The DD Check App for prevention and control of digital dermatitis in dairy herds	l	0	0	0	0	1	1	0	1	0	0	0	1	2016
436	2	2016-09-01	132	“Who’s been a good dog?” – Owner perceptions and motivations for treat giving	o	1	1	0	0	0	1	0	0	0	0	0	0	2016
437	2	2016-09-01	132	Broken biosecurity? Veterinarians’ framing of biosecurity on dairy farms in England	o	0	0	0	0	0	1	0	1	0	0	0	0	2016
438	2	2016-09-01	132	A retrospective epidemiological analysis of risk factors for a primary necropsy diagnosis of bovine respiratory disease	l	0	1	1	0	1	1	0	1	0	1	1	0	2016
439	2	2016-09-01	132	Enhanced surveillance of shellfish mortality to improve early detection and investigation of outbreaks of exotic or emerging infectious diseases: An example of a mass mortality outbreak of mussels, France 2014	a	0	0	0	0	0	0	0	0	0	0	0	1	2016
440	2	2016-09-01	132	Cost-benefit analysis of foot and mouth disease control in Ethiopia	o	0	0	0	0	0	0	0	1	0	0	0	0	2016
441	2	2016-09-01	132	Correlations between peripheral parasite load and common clinical and laboratory alterations in dogs with visceral leishmaniasis	s	0	1	0	0	0	1	0	1	0	0	0	0	2016
442	2	2016-09-01	132	Risk assessment and management of brucellosis in the southern greater Yellowstone area (I): A citizen-science based risk model for bovine brucellosis transmission from elk to cattle	m	0	0	0	0	0	0	1	0	0	1	0	1	2016
443	2	2016-09-01	132	Ostertagia spp., rumen fluke and liver fluke single- and poly-infections in cattle: An abattoir study of prevalence and production impacts in England and Wales	l	0	0	1	0	1	1	1	1	0	1	1	0	2016
444	2	2016-09-01	132	Risk factors associated with contagious caprine pleuro-pneumonia in goats in pastoral areas in the Rift Valley region of Kenya	l	1	1	1	0	1	1	0	1	1	1	1	1	2016
445	2	2016-09-01	132	The epidemiological and economic effects from systematic depopulation of Norwegian marine salmon farms infected with pancreas disease virus	a	0	0	0	0	1	0	0	1	0	0	0	1	2016
446	2	2016-09-01	132	Investigation of risk factors for mortality in aged guide dogs: A retrospective cohort study	s	1	1	1	1	0	1	0	0	1	1	1	0	2016
447	2	2017-09-01	144	Prediction of Streptococcus uberis clinical mastitis risk using Matrix-assisted laser desorption ionization time of flight mass spectrometry (MALDI-TOF MS) in dairy herds	l	0	0	0	0	0	0	0	0	0	0	0	0	2017
448	2	2017-09-01	144	Contextual herd factors associated with cow culling risk in Québec dairy herds: A multilevel analysis	l	0	0	0	0	1	1	0	1	0	1	0	1	2017
449	2	2017-09-01	144	VacciCost – A tool to estimate the resource requirements for implementing livestock vaccination campaigns. Application to peste des petits ruminants (PPR) vaccination in Senegal	o	0	0	0	0	1	0	0	1	0	1	1	1	2017
450	2	2017-09-01	144	Benchmarking of pluck lesions at slaughter as a health monitoring tool for pigs slaughtered at 170 kg (heavy pigs)	l	1	1	1	0	0	1	1	1	0	0	1	0	2017
451	2	2017-09-01	144	A matched case-control study comparing udder health, production and fertility parameters in dairy farms before and after the eradication of Bovine Virus Diarrhoea in Switzerland	l	1	1	1	1	1	1	1	1	0	0	0	0	2017
452	2	2017-09-01	144	A scoping review of published research on the population dynamics and control practices of companion animals	m	0	1	1	0	0	0	0	1	0	0	1	0	2017
453	2	2017-09-01	144	A protocol to identify and minimise selection and information bias in abattoir surveys estimating prevalence, using Fasciola hepatica as an example	o	0		0	0	0		0	0	0		0	1	2017
454	2	2017-09-01	144	Attitudes towards worm egg counts and targeted selective treatment against equine cyathostomins	h	0	1	1	0	1	1	1	1	0	0	0	0	2017
455	2	2017-09-01	144	Influence of true within-herd prevalence of small ruminant lentivirus infection in goats on agreement between serological immunoenzymatic tests	l	0	1	1	0	1	1	1	1	1	1	1	0	2017
456	2	2017-09-01	144	Spatial dynamics of porcine epidemic diarrhea (PED) spread in the southern Kyushu, Japan	l	1	1	1	0	1	1	1	1	0	0	0	0	2017
457	2	2017-09-01	144	Understanding animal health communication networks among smallholder livestock producers in Australia using stakeholder analysis	o	0	0	0	0	1	1	0	0	0	0	0	0	2017
458	2	2017-09-01	144	Risk factors for underweight and overweight in cats in metropolitan Sydney, Australia	s	0	1	1	1	1	1	0	1	0	1	0	1	2017
459	2	2017-09-01	144	Effect of immunologic solutions on sows and gilts on time to stability, and production losses in breeding herds infected with 1-7-4 PRRSv	l	0	1	0	0	1	1	0	1	0	1	0	0	2017
460	2	2017-09-01	144	Impact of FMD outbreak on milk production and heifers’ growth on a dairy herd in southern Iran	l	1	1	1	0	1	1	1	1	0	1	1	0	2017
461	2	2017-09-01	144	Epidemiological features and financial loss due to clinically diagnosed Haemorrhagic Septicemia in bovines in Karnataka, India	l	0	1	1	0	0	1	1	1	0	0	0	0	2017
462	2	2017-09-01	144	Quantitative assessment of social and economic impact of African swine fever outbreaks in northern Uganda	l	0	1	1	0	1	1	1	1	0	0	0	0	2017
463	2	2017-09-01	144	Maximum entropy modeling risk of anthrax in the Republic of Kazakhstan	l	0	0	0	0	1	0	0	1	0	0	0	0	2017
464	2	2017-09-01	144	Quantitative and qualitative analysis of antimicrobial usage in white veal calves in France	l	0	0	0	0	1	1	1	1	0	0	1	1	2017
465	2	2017-09-01	144	Herd-specific interventions to reduce antimicrobial usage in pig production without jeopardising technical and economic performance	l	1	1	1	0	1	1	0	1	0	0	0	0	2017
466	2	2017-09-01	144	Strategic control of Rhipicephalus (Boophilus) microplus infestation on beef cattle grazed in Panicum maximum grasses in a subtropical semi-arid region of Argentina	l	1	1	1	0	1	1	1	0	0	0	0	0	2017
467	2	2017-09-01	145	Economic evaluation of the eradication program for bovine viral diarrhea in the Swiss dairy sector	l	0	0	0	1	0	0	0	1	0	0	0	0	2017
468	2	2017-09-01	145	Exploring the role of small-scale livestock keepers for national biosecurity—The pig case	l	0	1	0	0	0	1	0	1	0	0	0	0	2017
469	2	2017-09-01	145	Prevalence and risk factors for transition period diseases in grazing dairy cows in Brazil	l	0	0	1	0	0	0	0	0	1	0	1	0	2017
470	2	2017-09-01	145	Prevalence of subclinical mastitis and associated risk factors at cow and herd level in dairy farms in North-West Ethiopia	l	0	0	1	1	0	1	0	1	0	1	1	1	2017
471	2	2017-09-01	145	Validation of a model for ranking aquaculture facilities for risk-based disease surveillance	a	1	1	1	0	1	1	1	1	0	0	0	0	2017
472	2	2017-09-01	145	Mortality in Danish Swine herds: Spatio-temporal clusters and risk factors	l	0	1	1	0	0	1	1	0	0	0	1	0	2017
473	2	2017-09-01	145	Risk assessment of the entry of canine-rabies into Papua New Guinea via sea and land routes	s	0	1	1	0	0	1	0	0	0	0	0	0	2017
474	2	2017-09-01	145	Persistence of Mycoplasma hyopneumoniae sequence types in spite of a control program for enzootic pneumonia in pigs	l	0	0	0	0	0	0	0	0	0	0	0	0	2017
475	2	2017-09-01	145	Salmonella enterica subsp. diarizonae serotype 61:k:1,5,(7) associated with chronic proliferative rhinitis and high nasal colonization rates in a flock of Texel sheep in Switzerland	l	0	0	0	0	0	0	0	0	0	0	0	0	2017
476	2	2017-09-01	145	Sampling pig farms at the abattoir in a cross-sectional study − Evaluation of a sampling method	l	0	1	0	0	0	1	1	1	0	0	0	0	2017
477	2	2017-09-01	145	Factors affecting the cost-effectiveness of on-farm culture prior to the treatment of clinical mastitis in dairy cows	l	0	0	0	0	0	1	0	1	0	0	0	0	2017
478	2	2017-09-01	145	A Bayesian latent class model to estimate the accuracy of pregnancy diagnosis by transrectal ultrasonography and laboratory detection of pregnancy-associated glycoproteins in dairy cows	l	0	0	0	0	0	0	0	0	0	0	1	0	2017
479	2	2017-09-01	145	Detection accuracy of Renibacterium salmoninarum in Chinook salmon, Oncorhynchus tshawytscha (Walbaum) from non-lethally collected samples: Effects of exposure route and disease severity	a	0	0	0	0	0	0	0	0	0	0	1	0	2017
480	2	2017-09-01	145	Predicting farm-level animal populations using environmental and socioeconomic variables	o	0	1	0	0	1	1	1	0	0	1	1	0	2017
481	3	1997-05-01	30	Rick factors for seroprevalence of ovine lentivirus in breeding ewe flocks in Nebraska, USA	l	0	1	1	1	1	1	1	1	0	0	1	1	1997
482	3	1997-05-01	30	The prevalence of serum antibodies to tick-borne infections in cattle in smallholder dairy farms in Murang’a District, Kenya; a cross-sectional study	l	0	1	1	0	0	1	1	0	0	1	0	0	1997
483	3	1997-05-01	30	Application of composite estimation in studies of animal population production with two-stage repeated sample designs	o	1	1	1	0	0	0	0	1	0	0	0	0	1997
484	3	1997-05-01	30	Economic evaluation of national identification and recording systems for pigs in Belgium	l	0	0	0	0	0	0	0	0	0	0	1	0	1997
485	3	1997-05-01	30	Economic evaluation of bovine brucellosis and tuberculosis eradication programes in a mountain area in Spain	l	0	0	0	0	0	0	0	0	0	0	0	0	1997
486	3	1997-05-01	30	Cross-sectional estimation of Babesia bovis antibody prevalence in an area of Argentina used for extensive cattle breeding as an aid to control babesiosis	l	0	0	0	0	0	0	0	0	1	1	0	0	1997
487	3	1997-05-01	30	Effect of ewe ovine lentivirus infection on ewe and lamb productivity	l	0	1	1	0	1	1	0	1	0	0	1	1	1997
488	3	1997-05-01	30	Survivorship approaches to measuring and comparing cull rates for dairies	l	0	0	0	0	0	1	0	0	0	0	1	0	1997
489	3	1998-06-01	35	Ethnoveterinary medicines used for ruminants in Trinidad and Tobago	l	0	0	0	0	0	0	0	0	0	0	0	0	1998
490	3	1998-06-01	35	Risk factors for false-positive serological reactions for bovine brucellosis in SaoÃne-et-Loire (France)	l	0	0	0	0	1	1	1	1	0	1	0	0	1998
491	3	1998-06-01	35	An epidemiological study of calcium metabolism in non-paretic postparturient Holstein cows	l	0	1	1	0	0	1	0	1	0	0	0	0	1998
492	3	1998-06-01	35	Ivermectin treatment did not increase slaughter weight of first-year reindeer calves	w	0	1	1	0	0	1	0	1	0	0	0	0	1998
493	3	1998-06-01	35	A Reed-Frost model of the spread of tuberculosis within seven Swedish extensive farmed fallow deer herds	w	0	0	0	0	0	0	0	0	0	0	0	0	1998
494	3	1998-06-01	35	Risk factors for the presence of antibodies to Toxoplasma gondii in Norwegian slaughter lambs	l	0	1	1	0	0	0	0	0	1	0	1	0	1998
495	3	1998-06-01	35	Risk factors associated with Corynebacterium pseudotuberculosis infection in California horses	h	1	1	1	1	1	1	0	1	0	0	1	1	1998
496	3	1998-06-01	35	Application and evaluation of a mailed questionnaire for an epidemiologic study of Corynebacterium pseudotuberculosis infection in horses	h	1	1	0	0	1	1	0	1	0	0	0	0	1998
497	3	1998-06-01	35	Management factors associated with swine breeding-herd productivity in the United States	l	0	1	1	0	0	1	1	0	0	0	0	0	1998
498	3	1998-06-01	35	Evaluation of bluetongue virus diagnostic tests in free-ranging bighorn sheep	l	0	1	1	1	0	1	1	1	0	0	1	0	1998
499	3	1998-06-01	35	Evaluation of alternative strategies to prevent Newcastle disease in Cambodia	p	0	0	0	0	0	0	0	0	0	0	0	0	1998
500	3	1998-06-01	35	Temporal and spatial patterns of African swine fever in Sardinia	l	1	1	1	0	1	1	1	1	1	0	1	0	1998
501	3	1999-06-01	40	Seroprevalence of Toxoplasma gondii infection in sheep and alpacas (Llama pacos) in Chile	l	1	1	1	1	1	1	1	1	0	0	0	0	1999
502	3	1999-06-01	40	Herd-level economic losses associated with Johne's disease on US dairy operations	l	0	1	1	1	0	1	1	1	0	0	0	0	1999
503	3	1999-06-01	40	Associations of veterinary services and farmer characteristics with the prevalences of brucellosis and border disease in small ruminants in Spain	l	0	1	1	0	1	1	0	1	0	1	1	0	1999
504	3	1999-06-01	40	A longitudinal field study of mortality and Marek's disease in Norwegian and imported White Leghorns	p	1	1	1	0	1	1	0	0	0	0	0	0	1999
505	3	1999-06-01	40	Herd factors affecting the selection and success of intervention strategies in the program for eradication of pseudorabies (Aujeszky's disease) virus from Illinois swine farms	l	0	0	1	0	0	1	0	0	0	0	1	0	1999
506	3	1999-06-01	40	Management factors associated with Babesia bovis seroprevalence in cattle from eastern YucataÂn, Mexico	l	1	1	1	1	0	1	0	0	1	1	1	1	1999
507	3	1999-06-01	40	Incidence of leptospiral abortion in Brazilian dairy cattle	l	0	0	0	0	0	0	0	1	0	0	0	1	1999
508	3	1999-06-01	40	Salmonella level of Danish swine herds based on serological examination of meat-juice samples and salmonella occurrence measured by bacteriological follow-up	l	0	1	0	0	1	1	0	0	0	0	1	0	1999
509	3	1999-06-01	41	A simulation model for studying the role of pre-slaughter factors on the exposure of beef carcasses to human microbial hazards	m	0	0	0	0	0	0	0	1	0	0	0	0	1999
510	3	1999-06-01	41	Effects of disease on milk production in the dairy cow: a review	l	0	1	1	0	0	1	0	1	0	0	0	0	1999
511	3	1999-06-01	41	Pre-slaughter control of Escherichia coli O157 in beef cattle: a simulation study	l	0	0	1	0	0	0	0	0	0	0	0	0	1999
512	3	1999-06-01	40	Associations of Neospora caninum seropositivity with gestation number and pregnancy outcome in Danish dairy herds	l	1	1	1	0	1	1	0	1	0	1	1	0	1999
513	3	1999-06-01	40	Factors associated with being a bovine-virus diarrhoea (BVD) seropositive dairy herd in the Mùre and Romsdal County of Norway	l	0	1	1	1	0	1	1	1	0	0	1	0	1999
514	3	1999-06-01	40	Perceptions of veterinarians regarding privatization of veterinary services delivery in Ghana and Jamaica	o	0	1	1	1	0	1	0	1	0	0	0	0	1999
515	3	1999-06-01	40	The reproductive performance of sows after PRRS vaccination depends on stage of gestation	l	0	0	1	0	0	1	1	1	0	0	0	0	1999
516	3	2000-06-01	45	A discrete-event computer model of feline herpes virus within cat populations	s	0	0	1	0	0	1	1	0	0	0	0	0	2000
517	3	2000-06-01	45	Suboptimal reproductive performance of dairy cattle kept in smallholder herds in a rural highland area of northern Tanzania	l	1	1	1	0	0	1	0	0	0	0	0	1	2000
518	3	2000-06-01	45	Use of Brucella abortus vaccine strain RB51 in pregnant cows after calfhood vaccination with strain 19 in Argentina	l	0	1	0	0	0	0	0	0	0	1	0	0	2000
519	3	2000-06-01	45	Medicinal plants used for dogs in Trinidad and Tobago	s	0	0	0	0	0	0	0	0	0	0	0	0	2000
520	3	2000-06-01	45	A longitudinal study of serological patterns of respiratory infections in nine infected Danish swine herds	l	0	0	0	0	0	0	0	0	0	1	0	0	2000
521	3	2000-06-01	45	Prevalence and distribution of gastro-intestinal helminths and haemoparasites in young scavenging chickens in upper eastern region of Ghana, West Africa	p	0	1	1	1	1	0	0	1	0	1	0	0	2000
522	3	2000-06-01	45	Estimates of within-herd incidence rates of Mycobacterium bovis in Canadian cattle and cervids between 1985 and 1994	l	1	1	1	0	0	1	0	1	0	1	1	0	2000
523	3	2000-06-01	45	Techniques for analysis of disease clustering in space and in time in veterinary epidemiology	o	0		1	0	0		0	1	0		0	0	2000
524	3	2000-06-01	45	Prevalence of bovine herpesvirus-1 in the Belgian cattle population	l	0	0	0	0	0	0	0	0	1	0	1	1	2000
525	3	2000-06-01	45	Preliminary findings of Salmonella spp. in captive green iguanas (Iguana iguana) and their environment	e	0	0	0	0	0	0	0	0	0	1	0	0	2000
526	3	2000-06-01	45	Factors associated with intersucking in Swiss dairy heifers	l	0	1	1	0	0	1	1	1	0	1	1	0	2000
527	3	2001-05-01	49	Sense and Sensitivity - designing surveys based on an imperfect test	o	0		0		0		0		1		0		2001
528	3	2001-05-01	49	Host factors associated with the detection of Aeromonas Salmonicida and Yersinia ruckeri in Ontarion, Canada government fish hatcheries	a	0	0	1	0	1	1	1	0	0	0	0	0	2001
529	3	2001-05-01	49	Estimation of animal-level prevalence from pooled samples in animal production	o	0	0	1	0	1	1	0	1	0	1	1	1	2001
530	3	2001-05-01	49	Cross-sectional study of the seroprevalence to Borrelia burgdorferi sensu lato and granulocytic Ehrlichia spp. and demographic, clinical and tick-exposure factors in Swedish horses	h	0	1	1	1	1	1	0	1	0	1	1	0	2001
531	3	2001-05-01	49	A multicenter, matched case-control study of risk factors for equine laminitis	h	0	1	1	1	0	1	0	1	1	1	1	1	2001
532	3	2001-05-01		Censoring in survival analysis: a simulation study of the effect of milk yield on conception	l	0	1	1	1	0	1	0	1	0	0	0	0	2001
533	3	2001-05-01	49	A field trial of the effect of improved piglet management on smallholder sow productivity in the Philippines	l	0	1	1	0	1	1	0	0	0	1	0	0	2001
534	3	2001-05-01	49	Antibody-ELISA seroprevalence of bovine trypanosomosis in the Eastern Province of Zambia	l	1	1	0	0	0	1	0	0	0	0	0	0	2001
535	3	2001-05-01	49	Risk factors for clinical salmonellosis in Virginia, USA cattle herds	l	0	1	1	0	1	1	0	1	1	1	1	0	2001
536	3	2002-06-01	54	Risk factors for repeat-breeder syndrome in New South Wales dairy cows	l	0	1	1	0	1	1	1	1	0	0	1	0	2002
537	3	2002-06-01	54	Calculating sample size bounds for logistic regression	o	0		0	0	0		0	0	0		0	0	2002
538	3	2002-06-01	54	The effect of claw trimming on the hoof health of Swedish dairy cattle	l	0	0	0	0	1	0	0	1	0	0	1	0	2002
539	3	2002-06-01	54	Risk of introduction of BSE into Sweden by import of cattle from the United Kingdom	l	0	0	0	0	0	0	0	0	0	1	0	1	2002
540	3	2002-06-01	54	Molecular epidemiology of feline bordetellosis in two animal shelters in California, USA	s	0	0	0	0	0	1	0	1	0	1	0	0	2002
541	3	2002-06-01	54	Risk factors for clinical Salmonella enterica subsp. enterica serovar Typhimurium infection on Dutch dairy farms	l	0	1	1	0	1	1	1	1	0	0	1	0	2002
542	3	2002-06-01	54	Prevalence of and risk factors for Salmonella in water offered to weaned diary calves in California, USA	l	0	0	0	0	0	0	0	0	0	0	0	0	2002
543	3	2002-06-01	54	Risk factors for metritis in Danish dairy cows	l	0	0	1	0	0	1	1	1	0	1	1	0	2002
544	3	2003-06-01	59	Review of successes and failures of contagious bovine pleuropneumonia control strategies in Tanzania	l	0	0	0	0	0	0	0	0	0	0	0	0	2003
545	3	2003-06-01	59	Maedi-visna impact on productivity in Quebec sheep flocks (Canada)	l	0	1	1	0	0	1	0	0	0	0	0	0	2003
546	3	2003-06-01	59	Biosecurity practices on intensive pig production systems in Chile	l	0	1	1	0	0	0	0	0	0	0	0	0	2003
547	3	2003-06-01	59	Social-network analysis of Mycobacterium bovis transmission among captive brushtail possums (Trichosurus vulpecula)	w	0	1	1	0	0	1	1	1	0	1	1	0	2003
548	3	2003-06-01	59	The association between quarter somatic-cell counts and clinical mastitis in three British dairy herds	l	1	0	1	0	1	1	0	1	0	0	1	0	2003
549	3	2003-06-01	59	A Bayesian approach to the accuracy of clinical observations	o	0	0	0	0	0	1	0	0	0	0	1	0	2003
550	3	2003-06-01	59	An economic risk assessment of the management of pregnant feedlot heifers in the USA	l	0	0	0	0	0	0	0	0	0	0	0	1	2003
551	3	2003-06-01	59	Analysis of correlated discrete observations: background, examples and solutions	o	0		1	1	0		0	1	0		0	0	2003
552	3	2003-06-01	59	A demonstration of interval-censored survival analysis	o	0	1	1	0	0	1	0	0	0	1	1	0	2003
553	3	2004-06-01	64	Estimation of infection prevalence from correlated binomial samples	o	0	0	0	0	0	1	0	1	0	1	1	1	2004
554	3	2004-06-01	64	Risk factors for Campylobacter spp. infection in Senegalese broiler-chicken flocks	p	1	1	1	0	0	1	0	0	0	0	1	0	2004
555	3	2004-06-01	64	Within-herd spread of contagious bovine pleuropneumonia in Ethiopian highlands	l	0	1	1	1	0	1	1	1	0	1	1	0	2004
556	3	2004-06-01	64	The “effects” of Rev-1 vaccination of sheep and goats on human brucellosis in Greece	l	0	1	0	0	0	1	0	1	0	0	0	0	2004
557	3	2004-06-01	64	Prevalence estimation and risk factors for Escherichia coli O157 on Dutch dairy farms	l	0	1	1	1	0	1	0	1	0	0	1	0	2004
558	3	2004-06-01	64	Seroprevalence of and risk factors for Bartonella henselae and Bartonella quintana infections among pet cats in Jordan	s	0	1	1	0	1	1	0	0	0	0	0	0	2004
559	3	2005-06-01	69	Risk factors for the introduction of high pathogenicity Avian Influenza virus into poultry farms during the epidemic in the Netherlands in 2003	p	0	0	0	0	1	1	0	1	1	1	1	1	2005
560	3	2005-06-01	69	Influence of tooth resection in piglets on welfare and performance	l	1	1	1	0	0	1	1	0	0	0	0	0	2005
561	3	2005-06-01	69	Animal and farm influences on the dynamics of antibiotic resistance in faecal Escherichia coli in young dairy calves	l	0	1	1	0	0	1	0	1	0	0	1	0	2005
562	3	2005-06-01	69	Stochastic efficiency analysis of bovine tuberculosis-surveillance programs in the Netherlands	l	0	0	0	0	0	0	0	0	0	0	0	0	2005
563	3	2005-06-01	69	Spatial distribution of antibodies to Salmonella enterica serovar Typhimurium O antigens in bulk milk from Texas dairy herds	l	0	0	0	0	0	0	0	1	0	1	0	0	2005
564	3	2005-06-01	69	Effect of diagnostic testing error on intracluster correlation coefficient estimation	o	0		0	0	0		0	0	0		0	0	2005
565	3	2005-06-01	69	A model of animal–human brucellosis transmission in Mongolia	m	0	0	0	0	0	0	0	0	0	1	1	0	2005
566	3	2005-06-01	69	An exploratory study on risk factors for postweaning multisystemic wasting syndrome (PMWS) in Spain	l	0	1	1	0	1	1	1	1	0	0	1	0	2005
567	3	2005-06-01	69	Incidence of and survival after mammary tumors in a population of over 80,000 insured female dogs in Sweden from 1995 to 2002	s	0	1	1	0	0	1	0	1	0	1	1	0	2005
568	3	2005-06-01	69	Area-level risks for BSE in British cattle before and after the July 1988 meat and bone meal feed ban	l	0	0	1	0	0	1	0	0	0	0	1	0	2005
569	3	2005-06-01	69	Seroprevalence of brucellosis in mithuns (Bos frontalis) in India	l	0	0	1	0	0	0	0	0	0	1	1	0	2005
570	3	2006-06-01	74	Quantification and evaluation of antimicrobial drug use in group treatments for fattening pigs in Belgium	l	0	0	0	0	0	0	0	0	0	0	0	0	2006
571	3	2006-06-01	74	Risk factors for Campylobacter spp. colonization in broiler flocks in Iceland	p	0	1	1	0	0	1	1	1	0	1	1	0	2006
572	3	2006-06-01	74	The effect of hen-egg antibodies on Clostridium perfringens colonization in the gastrointestinal tract of broiler chickens	p	0	1	1	1	1	1	1	1	0	0	0	0	2006
573	3	2006-06-01	74	Seasonal variation of bulk milk somatic cell counts in UK dairy herds: Investigations of the summer rise	l	0	0	0	0	0	0	0	0	0	0	0	0	2006
574	3	2006-06-01	74	Factors affecting sensitivity and specificity of pooled-sample testing for diagnosis of low prevalence infections	o	0	0	0	0	0	0	0	0	0	0	0	0	2006
575	3	2007-06-01	80	Prevalence of Salmonella antibodies among goats slaughtered for chevon in Bareilly (Northern India)	l	0	0	1	0	1	1	0	1	0	0	0	0	2007
576	3	2007-06-01	80	The potential role of wild and feral animals as reservoirs of foot-and-mouth disease	w	0	0	0	0	0	0	0	0	0	0	0	0	2007
577	3	2007-06-01	80	Livestock farmers’ perception and epidemiology of bovine trypanosomosis in Kwale District, Kenya	l	0	0	0	0	0	0	0	1	0	0	0	0	2007
578	3	2007-06-01	80	Risk factors for Campylobacter spp. colonization in French free-range broiler-chicken flocks at the end of the indoor rearing period	p	1	1	1	0	0	1	0	1	0	0	1	0	2007
579	3	2007-06-01	80	Sensitivity analysis to identify key-parameters in modelling the spread of bovine viral diarrhoea virus in a dairy herd	l	0	0	0	0	0	0	0	1	0	0	0	0	2007
580	3	2008-06-01	85	Prevalence of serum antibodies to bovine herpesvirus-1 and bovine viral diarrhea virus in beef cattle in Uruguay	l	0	1	0	0	0	1	0	0	0	1	1	0	2008
581	3	2008-06-01	85	Accuracy of two commercial enzyme-linked immunosorbent assays for the detection of antibodies to Salmonella spp. in slaughter pigs from Canada	l	0	1	0	0	1	1	0	0	0	1	1	0	2008
582	3	2008-06-01	85	Dynamics of infection and immunity in a dairy cattle population undergoing an eradication programme for Infectious Bovine Rhinotracheitis (IBR)	l	0	1	1	0	1	1	0	1	0	0	0	0	2008
583	3	2008-06-01	85	Risk factors for disclosure of additional tuberculous cattle in attested-clear herds that had one animal with a confirmed lesion of tuberculosis at slaughter during 2003 in Ireland	l	0	1	1	1	0	1	0	1	0	1	1	1	2008
584	3	2008-06-01	85	Evaluation of test-strategies for estimating probability of low prevalence of paratuberculosis in Danish dairy herds	l	0	0	0	0	0	0	0	0	0	0	1	0	2008
585	3	2008-06-01	85	Modelling foot-and-mouth disease: A comparison between the UK and Denmark	l	0		0	0	1		0	1	0		1	0	2008
586	3	2008-06-01	85	Herd and cow-level prevalence of sole ulcers in The Netherlands and associated-risk factors	l	0	0	1	0	1	1	0	1	0	0	1	0	2008
587	3	2008-06-01	85	Flock-level case–control study of slaughter-lamb pneumonia in New Zealand	l	0	1	1	0	0	1	1	1	0	1	1	0	2008
588	3	2008-06-01	85	Repeatability of a telephone questionnaire on cat-ownership patterns and pet-owner demographics evaluation in a community in Texas, USA	s	0	0	0	0	0	0	0	0	0	0	1	0	2008
589	3	2008-06-01	85	A health-education intervention trial to reduce porcine cysticercosis in Mbulu District, Tanzania	l	0	1	1	0	1	1	0	1	0	1	0	0	2008
590	3	2009-06-01	89	Veterinarian injuries associated with bovine TB testing livestock in Michigan, 2001	m	0	1	0	0	1	1	0	1	0	1	1	0	2009
591	3	2009-06-01	89	Modelling the demographics of the Irish cattle population	l	0	1	0	0	0	1	0	1	0	0	0	0	2009
592	3	2009-06-01	89	Bayesian estimation of variance partition coefficients adjusted for imperfect test sensitivity and specificity	o	0	0	0	0	0	0	0	1	0	0	0	0	2009
593	3	2009-06-01	89	Mycobacterium avium subsp. paratuberculosis in cow bulk tank milk in Cyprus detected by culture and quantitative IS900 and F57 real-time PCR§	l	0	0	0	0	0	0	0	0	0	0	0	0	2009
594	3	2009-06-01	89	Association of growth, feeding practices and exercise conditions with the prevalence of Developmental Orthopaedic Disease in limbs of French foals at weaning	h	0	1	1	0	1	1	0	1	1	1	1	0	2009
595	3	2009-06-01	89	Modelling foot and mouth disease	m	0		0		0		1		0		0		2009
596	3	2009-06-01	89	Prevalence of Michigan dairy herds infected with Mycobacterium avium subspecies paratuberculosis as determined by environmental sampling	l	0	1	1	0	0	1	0	1	0	1	1	1	2009
597	3	2009-06-01	89	An object-oriented Bayesian network modeling the causes of leg disorders in finisher herds	l	0	0	0	0	0	0	0	1	0	0	0	0	2009
598	3	2009-06-01	89	Heifer rearing conditions affect length of productive life in Swedish dairy cows	l	0	1	1	0	0	1	0	1	0	0	1	0	2009
599	3	2009-06-01	89	Risk factors for Campylobacter colonisation during rearing of broiler flocks in Great Britain	p	0	1	1	0	0	1	0	0	0	0	0	0	2009
600	3	2009-06-01	89	Sole ulcers in Finnish dairy cattle	l	0	1	1	0	1	1	0	1	0	0	1	0	2009
601	3	2009-06-01	89	Farm-level factors associated with above-average production on pig farms in Evia, Greece	l	0	1	1	1	1	1	1	1	1	1	1	0	2009
602	3	2009-06-01	89	The price of the precautionary principle: Cost-effectiveness of BSE intervention strategies in the Netherlands	l	0	0	0	0	0	0	0	0	0	0	0	0	2009
603	3	2009-06-01	89	Risk factors of bovine tuberculosis in cattle in rural livestock production systems of Ethiopia	l	1	1	1	1	1	1	0	1	0	1	1	0	2009
604	3	2009-06-01	89	A nation-wide epidemiological study of acute bovine respiratory disease in France	l	0	1	1	0	1	1	0	1	0	0	1	0	2009
605	3	2009-06-01	89	A survey of bovine cysticercosis/human taeniosis in Northern Turkana District, Kenya	m	1	1	1	0	1	1	0	1	1	1	1	1	2009
606	3	2010-06-01	95	Analysis of trends in the full publication of papers from conference abstracts involving pre-harvest or abattoir-level interventions against foodborne pathogens	o	0	1	1	0	1	1	1	1	1	1	0	0	2010
607	3	2010-06-01	95	Paraveterinary service use in Nepal’s Himalaya	o	0	0	0	0	0	0	0	1	0	0	1	0	2010
608	3	2010-06-01	95	Effects of neoprene mat on diarrhea, mortality and foreleg abrasion of pre-weaning piglets	l	1	1	1	0	0	1	1	1	0	0	0	0	2010
609	3	2010-06-01	95	Estimating animal movement contacts between holdings of different production types	m	0	1	0	0	0	0	0	0	0	0	0	0	2010
610	3	2010-06-01	95	The association between bulk tank milk analysis for raw milk quality	l	0	1	1	0	1	1	1	1	0	0	1	0	2010
611	3	2010-06-01	95	Effect of classifying disease states in genetic association studies for paratuberculosis	u	0	0	1	0	0	1	1	1	0	1	1	1	2010
612	3	2010-06-01	95	Antimicrobial use in Swiss dairy farms: Quantification and evaluation of data quality	l	0	0	0	0	0	1	1	0	0	1	1	0	2010
613	3	2010-06-01	95	Modelling the economic impact of three lameness causing diseases using herd and cow level evidence	l	0	0	0	0	0	0	0	0	0	1	0	1	2010
614	3	2010-06-01	95	Development and validation of a bilingual questionnaire for measuring udder health related management practices on dairy farms	l	0	1	1	0	1	1	1	1	0	0	1	0	2010
615	3	2010-06-01	95	A stochastic risk-analysis model for the spread of bovine viral diarrhea virus after introduction to naïve cow–calf herds	l	0	0	0	0	0	1	0	1	0	0	1	0	2010
616	3	2010-06-01	95	Risk of carcase contamination with Campylobacter in sheep sent for slaughter into an abattoir in Scotland	l	0	1	1	1	0	1	0	1	0	1	1	0	2010
617	3	2010-06-01	95	Methodological approach for substantiating disease freedom in a heterogeneous small population. Application to ovine scrapie, a disease with a strong genetic susceptibility	l	0	0	0	0	0	1	0	0	1	1	0	1	2010
618	3	2010-06-01	95	The control of Corynebacterium pseudotuberculosis infection in sheep flocks: A mathematical model of the impact of vaccination, serological testing, clinical examination and lancing of abscesses	l	0	0	0	0	0	0	0	0	0	0	0	0	2010
619	3	2010-06-01	95	Diagnostic sampling strategies for virulent ovine footrot: Simulating detection of Dichelobacter nodosus serogroups for bivalent vaccine formulation	l	0	1	0	0	0	1	0	1	0	0	0	0	2010
620	3	2010-06-01	95	Evaluation of suspension array analysis for detection of egg yolk antibodies against Salmonella Enteritidis	u	1	1	0	0	0	0	0	0	1	0	1	0	2010
621	3	2010-06-01	95	Spatial and temporal clustering of calcium oxalate and magnesium ammonium phosphate uroliths in dogs living in Ontario, Canada between 1998 and 2006	s	0	1	1	0	1	1	0	0	0	0	0	0	2010
622	3	2010-06-01	95	A prospective matched nested case–control study of bacterial gill disease outbreaks in Ontario, Canada government salmonid hatcheries	a	0	1	0	0	1	1	0	1	0	0	0	0	2010
623	3	2011-06-01	100	Impact of risk aversion and disease outbreak characteristics on the incentives of producers as a group to participate in animal disease insurance—A simulation	u	0	0	0	0	0	1	0	1	0	0	0	0	2011
624	3	2011-06-01	100	Absence reduction in entomological surveillance data to improve niche-based distribution models for Culicoides imicola	u	1	1	1	1	1	1	1	1	0	0	0	0	2011
625	3	2011-06-01	100	Culling decisions of dairy farmers during a 3-year Salmonella control study	l	0	1	1	0	0	1	1	0	0	1	1	1	2011
626	3	2011-06-01	100	Prevalence of subclinical ketosis in dairy cattle in the Southwestern Iran and detection of cutoff point for NEFA and glucose concentrations for diagnosis of subclinical ketosis	l	0	1	1	1	0	1	1	1	0	1	1	0	2011
627	3	2011-06-01	100	Analysis of the spatial variation of Bovine tuberculosis disease risk in Spain (2006–2009)	l	0	0	0	0	0	0	0	1	0	0	0	0	2011
628	3	2011-06-01	100	A case-control study of risk factors for equine influenza spread onto horse premises during the 2007 epidemic in Australia	h	0	1	1	0	0	1	1	1	1	0	1	0	2011
629	3	2011-06-01	100	Prevalence and risk factors for Campylobacter spp. in chicken broiler flocks in Reunion Island (Indian Ocean)	p	0	0	1	0	0	0	0	1	1	1	1	1	2011
630	3	2011-06-01	100	Critical control points for avian influenza A H5N1 in live bird markets in low resource settings	p	0	0	0	0	0	0	0	0	0	0	0	0	2011
631	3	2011-06-01	100	The testing season affects red deer skinfold increase in response to phytohaemagglutinin	w	1	1		0	1	1		1	0	0		0	2011
632	3	2011-06-01	100	A cluster-randomised controlled trial to compare the effectiveness of different knowledge-transfer interventions for rural working equid users in Ethiopia	h	0	1	1	0	1	1	0	1	0	0	0	0	2011
633	3	2011-06-01	100	Identifying equine premises at high risk of introduction of vector-borne diseases using geo-statistical and space-time analyses	h	1	0	1	0	1	1	1	0	0	0	0	0	2011
634	3	2011-06-01	100	Structure discovery in Bayesian networks: An analytical tool for analysing complex animal health data	u	0	1	1	0	0	1	1	0	0	0	0	0	2011
635	3	2011-06-01	100	Within-herd contact structure and transmission of Mycobacterium avium subspecies paratuberculosis in a persistently infected dairy cattle herd	l	0	0	0	0	0	1	0	1	0	0	0	0	2011
636	3	2011-06-01	100	Responses of farmers to introduction in England and Wales of pre-movement testing for bovine tuberculosis	l	0	1	0	0	0	1	0	1	0	0	0	0	2011
637	3	2011-06-01	100	Longitudinal study of antimicrobial-resistant commensal Escherichia coli in the faeces of horses in an equine hospital	h	0	1	1	0	1	1	0	1	0	1	1	1	2011
638	3	2012-06-01	105	The human–animal interface of domestic livestock management and production and its relationship to brucellosis in the country of Georgia 2010: A rapid assessment analysis	m	0	1	1	0	0	1	1	0	0	0	1	0	2012
639	3	2012-06-01	105	Robust surveillance of animal diseases: An application to the detection of bluetongue disease	u	0	0	0	0	0	0	0	0	0	0	0	0	2012
640	3	2012-06-01	105	Completeness of metabolic disease recordings in Nordic national databases for dairy cows	l	0	1	1	0	0	1	1	0	0	1	1	0	2012
641	3	2012-06-01	105	A semi-parametric model for lactation curves: Development and application	l	0	0	1	0	0	1	0	1	0	0	0	0	2012
642	3	2012-06-01	105	Case control study to investigate risk factors for bovine neonatal pancytopenia (BNP) in young calves in southern Germany	l	1	1	1	0	0	1	1	1	1	1	1	1	2012
643	3	2012-06-01	105	Age-structured dynamic, stochastic and mechanistic simulation model of Salmonella Dublin infection within dairy herds	l	0	0	0	0	0	0	0	1	0	0	0	0	2012
644	3	2012-06-01	105	The epidemiology of bovine spongiform encephalopathy in the Republic of Ireland before and after the reinforced feed ban	l	0	1	1	0	0	1	1	1	0	1	1	0	2012
645	3	2012-06-01	105	Influence of floor surface and access to pasture on claw health in dairy cows kept in cubicle housing systems	l	0	0	1	0	0	0	0	1	0	0	1	1	2012
646	3	2012-06-01	105	The relationship between clinical signs of respiratory system disorders and lung lesions at slaughter in veal calves	l	0	0	1	0	1	1	1	1	0	1	0	0	2012
647	3	2012-06-01	105	Effect of management on prevention of Salmonella Dublin exposure of calves during a one-year control programme in 84 Danish dairy herds	l	0	1	1	0	0	1	0	1	0	1	1	0	2012
648	3	2012-06-01	105	Impact of regulatory perturbations to disease spread through cattle movements in Great Britain	l	0	1	0	0	1	1	0	1	0	0	0	0	2012
649	3	2012-06-01	105	Factors associated with failure in breeding soundness examination of Western USA rams	l	1	1	1	0	0	1	1	1	1	1	1	0	2012
650	3	2012-06-01	105	A Bayesian zero-truncated approach for analysing capture–recapture count data from classical scrapie surveillance in France	l	0	1	0	0	1	1	0	1	0	1	0	0	2012
651	3	2012-06-01	105	Investigation of mortality in Pacific oysters associated with Ostreid herpesvirus-1 Var in the Republic of Ireland in 2009	a	1	1	1	0	1	1	0	1	0	0	1	0	2012
652	3	2013-06-01	110	Cost of post-weaning multi-systemic wasting syndrome and porcine circovirus type-2 subclinical infection in England – An economic disease model	l	0	1	1	0	0	1	0	1	1	1	1	0	2013
653	3	2013-06-01	110	Economic efficiency analysis of different strategies to control post-weaning multi-systemic wasting syndrome and porcine circovirus type 2 subclinical infection in 3-weekly batch system farms	l	0	0	0	0	0	0	0	1	0	1	1	0	2013
654	3	2013-06-01	110	Diseases at the livestock–wildlife interface: Status, challenges, and opportunities in the United States	m	0		0	0	1		0	1	0		0	0	2013
655	3	2013-06-01	110	The value of animal movement tracing: A case study simulating the spread and control of foot-and-mouth disease in California	m	0	0	0	0	0	0	0	1	0	0	0	0	2013
656	3	2013-06-01	110	Major causes of organs and carcass condemnation in small ruminants slaughtered at Luna Export Abattoir, Oromia Regional State, Ethiopia	m	0	1	0	0	0	1	0	1	0	1	1	0	2013
657	3	2013-06-01	110	Factors affecting Bluetongue serotype 8 spread in Northern Europe in 2006: The geographical epidemiology	m	0	1	1	0	1	1	0	0	0	0	0	0	2013
658	3	2013-06-01	110	Prediction of Bluetongue virus seropositivity on pastoral properties in northern Australia using remotely sensed bioclimatic variables	m	0	0	0	0	0	1	0	1	1	1	1	0	2013
659	3	2013-06-01	110	Prevalence and risk-mapping of bovine brucellosis in Maranhão State, Brazil	l	0	1	1	1	0	1	0	1	1	1	1	1	2013
660	3	2013-06-01	110	Occurrence and factors associated with bovine cysticercosis recorded in cattle at meat inspection in Denmark in 2004–2011	l	0	0	0	0	0	0	0	0	0	1	0	0	2013
661	3	2013-06-01	110	Factors related to the level of occurrence of bovine abortion in Chilean dairy herds	l	0	1	1	0	0	1	0	1	0	1	1	1	2013
662	3	2013-06-01	110	Time series analysis of human and bovine brucellosis in South Korea from 2005 to 2010	l	0	0	1	1	0	1	0	1	0	1	0	0	2013
663	3	2013-06-01	110	Comparison of African swine fever virus prevalence and risk in two contrasting pig-farming systems in South-west and Central Kenya	l	1	1	0	0	1	1	0	1	0	1	1	0	2013
664	3	2013-06-01	110	Newborn piglet traits associated with survival and growth performance until weaning	l	1	1	1	1	1	0	0	0	0	0	1	0	2013
665	3	2013-06-01	110	Assessment of confidence in freedom from Aujeszky’s disease and classical swine fever in Danish pigs based on serological sampling—Effect of reducing the number of samples	l	0	0	0	1	0	0	0	0	0	0	0	0	2013
666	3	2013-06-01	110	Biosecurity practices in Spanish pig herds:Perceptions of farmers and veterinarians of the most important biosecurity measures	l	0	1	0	0	0	1	0	0	0	0	0	0	2013
667	3	2013-06-01	110	A longitudinal study of risk factors for teat lesions in 67 suckler ewes in a single flock in England	l	0	1	0	0	0	1	0	1	1	1	1	0	2013
668	3	2013-06-01	110	Bayesian estimation of true prevalence, sensitivity and specificity of indirect ELISA, Rose Bengal Test and Slow Agglutination Test for the diagnosis of brucellosis in sheep and goats in Bangladesh	m	0	0	1	0	0	1	0	1	0	1	0	0	2013
669	3	2013-06-01	110	Assessment of biosecurity practices of small-scale broiler producers in central Egypt	p	0	1	1	0	1	1	0	1	0	0	0	0	2013
670	3	2013-06-01	110	Size and spatial distribution of stray dog population in the University of São Paulo campus, Brazil	s	0	1	0	0	0	1	0	1	1	1	1	0	2013
671	3	2014-06-01	114	Validation of the diagnosis canine epilepsy in a Swedish animal insurance database against practice records	s	0	0	0	0	0	0	0	0	0	0	0	0	2014
672	3	2014-06-01	114	Simulation modelling of a hypothetical introduction of foot-and-mouth disease into Alberta	m	0	1	1	0	1	1	1	1	0	0	0	0	2014
673	3	2014-06-01	114	Determinants of referrals from paraprofessionals to veterinarians in Uganda and Kenya	o	0	1	1	0	0	1	1	1	0	0	1	1	2014
674	3	2014-06-01	114	Viral hemorrhagic septicemia IVb status in the United States: Inferences from surveillance activities and regional context	a	0	0	0	0	0	0	0	0	0	0	0	0	2014
675	3	2014-06-01	114	A conceptual framework for economic optimization of single hazard surveillance in livestock production chains	m	0	0	0	0	0	0	0	0	0	0	0	0	2014
676	3	2014-06-01	114	Local cattle movements in response to on going bovine tuberculosis zonation and regulations in Michigan, USA	l	0	0	0	0	0	1	0	1	0	0	0	0	2014
677	3	2014-06-01	114	Comparison of two methods for collecting antibiotic use data on small dairy farms	l	0	1	1	1	0	1	1	1	0	1	1	0	2014
678	3	2014-06-01	114	A cohort study on Actinobacillus pleuropneumoniae colonisation in suckling piglets	l	0	1	0	0	0	1	0	0	0	0	0	0	2014
679	3	2014-06-01	114	Effects of chlortetracycline and copper supplementation on antimicrobial resistance of fecal Escherichia coli from weaned pigs	l	1	1	1	1	1	1	1	1	1	1	1	1	2014
680	3	2014-06-01	114	Evaluating perspectives for PRRS virus elimination from pigdense areas with a risk factor based herd index	l	0	0	0	0	0	0	0	0	0	0	0	0	2014
681	3	2014-06-01	114	Effect of birth weight and colostrum intake on mortality and performance of piglets after cross-fostering in sows ofdifferent parities	l	1	1	1	0	0	1	0	0	0	0	1	0	2014
682	3	2014-06-01	114	Ewe characteristics associated with neonatal loss in Norwegian sheep	l	0	0	0	0	1	1	1	1	0	1	1	0	2014
683	3	2014-06-01	114	Molecular detection of canine parvovirus in flies (Diptera) at open and closed canine facilities in the eastern United States	o	0	1	0	0	1	1	1	1	0	1	1	0	2014
684	3	2015-06-01	120	A generic rabies risk assessment tool to support surveillance	u	0	0	0	0	0	1	0	0	0	0	0	0	2015
685	3	2015-06-01	120	How to reach the poor? Surveillance in low-income countries, lessons from experiences in Cambodia and Madagascar	u	0	1	1	0	0	0	0	0	0	0	0	0	2015
686	3	2015-06-01	120	A practical approach to designing syndromic surveillance systems for livestock and poultry	m	0		0	0	0		0	1	0	0	0	0	2015
687	3	2015-06-01	120	A generic weather-driven model to predict mosquito population dynamics applied to species of Anopheles, Culexand Aedes genera of southern France	o	0	0	1	0	0	1	0	0	0	0	0	0	2015
688	3	2015-06-01	120	Cost and sensitivity of on-farm versus slaughter house surveys for prevalence estimation and substantiatingfreedom from disease	u	0	0	0	0	0	0	0	0	0	1	0	0	2015
689	3	2015-06-01	120	Quantitative and qualitative assessment of the bovine abortion surveillance system in France	l	0	0	0	0	1	0	0	0	0	0	0	0	2015
690	3	2015-06-01	120	A rationale to unify measurements of effectiveness for animal health surveillance	u	0		1	0		0	0	0	0		0	0	2015
691	3	2015-06-01	120	Comparing capture–recapture methods for estimation of the size of small and medium-sized populations using empirical data on commercial turkey farms in Canada	p	0	0	0	0	0	0	0	0	0	1	1	1	2015
692	3	2015-06-01	120	Surveillance at the molecular level: Developing an integrated network for detecting variation in avian influenza viruses inIndonesia	p	0	0	0	0	0	1	0	0	0	0	0	0	2015
693	3	2015-06-01	120	Collective resistance to HPAI H5N1 surveillance in the Thai cockfighting community: Insights from a social anthropology study	p	0	0	0	0	0	0	0	0	0	0	0	0	2015
694	3	2015-06-01	120	Foot and mouth disease risk assessment in Mongolia—Local expertise to support national policy	m	0	0	0	0	0	1	0	0	0	0	0	1	2015
695	3	2015-06-01	120	One Health surveillance – More than a buzz word?	m	0				0				0				2015
696	3	2015-06-01	120	An approach for de-identification of point locations of livestock premises for further use in disease spread modeling	m	0	0	0	0	0	1	0	0	0	0	0	0	2015
697	3	2015-06-01	120	Evaluation of a hierarchical ascendant clustering process implemented in a veterinary syndromic surveillance system	o	0	0	0	0	0	0	0	0	1	1	0	0	2015
698	3	2015-06-01	120	Development of a HACCP-based approach to control paratuberculosis in infected Irish dairy herds	l	0	0	0	0	0	0	0	0	0	0	0	0	2015
699	3	2015-06-01	120	Dairy cattle management factors that influence on-farm density of European starlings inOhio, 2007–2009	l	0	1	1	0	0	1	0	0	0	1	1	0	2015
700	3	2015-06-01	120	Prediction of respiratory disease and diarrhea in veal calves based on immunoglobulin levels and the serostatus for respiratory pathogens measured atarrival	l	0	1	1	0	0	0	0	0	1	1	1	0	2015
701	3	2015-06-01	120	Impact of foot-and-mouth disease on milk production ona large-scale dairy farm in Kenya	l	0	1	1	0	0	0	0	1	0	1	1	0	2015
702	3	2015-06-01	120	Brucellosis and bovine tuberculosis prevalence in livestock from pastoralist communities adjacent to Awash National Park, Ethiopia	l	0	1	1	0	0	1	0	0	1	1	0	0	2015
703	3	2015-06-01	120	Dietary oregano essential oil alleviates experimentally induced coccidiosis in broilers	p	1	1	1	0	0	1	0	1	0	0	1	0	2015
704	3	2015-06-01	120	Low coverage of central point vaccination against dog rabies in Bamako, Mali	s	0	0	0	0	0	0	0	0	1	1	1	0	2015
705	3	2015-06-01	120	A current lifetable and causes of death for insured dogs in Japan	s	0	1	0	0	0	0	0	1	0	1	0	0	2015
706	3	2015-06-01	120	Space–time cluster analysis of sealice infestation (Caligus clemensi and Lepeophtheirus salmonis) on wild juvenile Pacific salmon in the Broughton Archipelago of Canada	w	0	0	0	0	0	1	0	0	0	0	0	0	2015
707	3	2016-06-01	128	Sero-survey of Avian Influenza in backyard poultry and wild bird species in Iran—2014	m	1	1	1	0	1	1	0	1	0	0	1	0	2016
708	3	2016-06-01	128	Description of an outbreak of highly pathogenic avian influenza in domestic ostriches (Struthio camelus) in South Africa in 2011	w	0	0	0	0	0	0	0	1	0	1	0	0	2016
709	3	2016-06-01	128	A participatory approach to design monitoring indicators ofproduction diseases in organic dairy farms	l	0	0	0	0	0	0	0	1	0	0	0	0	2016
710	3	2016-06-01	128	Associations between feedlot management practices and bovine respiratory disease in Australian feedlot cattle	l	0	0	0	0	0	1	0	1	0	0	0	0	2016
711	3	2016-06-01	128	Evaluation of two methodologies for lameness detection in dairy cows based on postural and gait abnormalities observed during milking and while restrained at headlock stachions	l	0	1	1	0	0	1	1	1	0	1	1	0	2016
712	3	2016-06-01	128	Network, cluster and risk factor analyses for porcine reproductive and respiratory syndrome using data from swine sites participating in a disease control program	l	0	1	1	1	1	1	1	1	0	0	0	0	2016
713	3	2016-06-01	128	Estimating sensitivity and specificity of a PCR for boot socks to detect Campylobacter in broiler primary production using Bayesian latentclass analysis	p	0	0	0	0	0	0	0	0	0	0	0	0	2016
714	3	2016-06-01	128	A real options approach to biotechnology investment policy—the case of developing a Campylobacter vaccine to poultry	p	0	0	0	0	0	0	0	1	0	0	0	0	2016
715	3	2016-06-01	128	Use of a multiple choice questionnaire to assess UK prescribing channels’ knowledge of helminthology and best practice surroundinganthelmintic use in livestock and horses	m	1	1	1	0	0	1	0	1	0	0	1	0	2016
716	3	2016-06-01	128	Comparison of alternatives to passive surveillance to detect foot and mouth disease incursions in Victoria, Australia	m	0	1	0	0	1	1	1	1	0	0	0	0	2016
717	3	2016-06-01	128	Comparison of risk-based versus random sampling in the monitoring of antimicrobial residues in Danish finishing pigs	l	0	0	0	0	0	0	0	0	0	0	1	0	2016
718	3	2016-06-01	128	Bayesian estimation of prevalence of paratuberculosis in dairy herds enrolled in a voluntary Johne’s Disease Control Programme in Ireland	l	0	0	0	0	0	0	0	0	0	1	1	0	2016
719	3	2016-06-01	128	Spatially explicit modeling of animal tuberculosis at the wildlife-livestock interface in Ciudad Real province, Spain	m	0	0	0	0	1	1	1	1	0	0	0	0	2016
720	3	2016-06-01	128	Quantitative risk assessment of the introduction of rabies into Japan through the illegal landing of dogs from Russian fishing boats in the ports of Hokkaido, Japan	s	0	0	0	0	0	0	0	0	0	0	1	0	2016
721	3	2016-06-01	128	Qualitative and quantitative impacts assessment of contagious bovine pleuropneumonia in Fulani pastoral herds of North-central Nigeria: The associated socio-cultural factors	l	1	1	1	1	1	1	1	1	1	1	1	1	2016
722	3	2016-06-01	128	Towards better-informed consent: Research with livestock-keepers and informal traders in East Africa	l	0	1	1	0	1	1	1	1	0	1	1	0	2016
723	3	2017-06-01	141	Canine leptospirosis in Switzerland—A prospective cross-sectional study examining seroprevalence, risk factors and urinary shedding of pathogenic leptospires	s	0	1	1	0	1	1	1	1	1	1	1	0	2017
724	3	2017-06-01	141	Effect of vaccination against sub-clinical Porcine Circovirus type 2 infection in a high-health finishing pig herd: A randomised clinical field trial	l	1	1	1	0	1	1	1	1	0	0	1	0	2017
725	3	2017-06-01	141	Johne’s disease in the eyes of Irish cattle farmers: A qualitative narrative research approach to understanding implications for disease management	l	0	0	0	0	0	1	0	1	0	0	0	0	2017
726	3	2017-06-01	141	Molecular and serological detection of Trypanosoma cruzi in dogs (Canis lupus familiaris) suggests potential transmission risk in areas of recent acute Chagas disease outbreaks in Colombia	s	0	1	0	0	0	1	0	1	0	0	0	0	2017
727	3	2017-06-01	141	“Catch 22”: Biosecurity awareness, interpretation and practice amongst poultry catchers	p	1	1	1	0	1	1	1	1	0	0	0	0	2017
728	3	2017-06-01	141	Assessment of concurrent infection with bovine viral diarrhoea virus (BVDV) and Mycobacterium bovis: A herd-level risk factor analysis from Northern Ireland	l	0	1	1	1	1	1	1	1	0	1	1	1	2017
729	4	1997-10-01	32	A comparison of different models for assessing variations in the sero-prevalence of infectious bovine rhinotracheitis by farm, area and district in Kenya	l	0	1	1	1	1	1	1	1	0	0	0	1	1997
730	4	1997-10-01	32	An analysis of age and body weight at first calving for Holsteins in the United States	l	0	1	1	1	0	0	0	1	0	0	1	0	1997
731	4	1997-10-01	32	Association between risk of seroconversion of sentinel cattle to bluetongue viruses and CuZicoides species (Diptera: Ceratopogonidae) in Queensland, Australia	o	1	1	0	0	1	1	0	1	0	1	1	0	1997
732	4	1997-10-01	32	Bovine anaplasmosis prevalence in northern Veracruz state, Mexico	l	0	0	0	0	0	0	0	0	0	0	0	0	1997
733	4	1997-10-01	32	Effect of husbandry methods on seropositivity to African swine fever virus in Sardinian swine herds	l	1	1	1	0	1	1	0	1	1	0	1	1	1997
734	4	1997-10-01	32	Evaluation of producer-recorded causes of preweaning mortality in Danish sow herds	l	0	1	0	0	0	0	1	1	0	1	1	0	1997
735	4	1997-10-01	32	Farm factors associated with the presence of Mycobacterium paratuberculosis infection in dairy herds on the New York State Paratuberculosis Control Program	l	0	0	0	0	1	1	0	1	0	1	1	0	1997
736	4	1997-10-01	32	Interrelationships between herd management practices and udder health status using canonical correspondence analysis	l	0	0	1	0	0	1	1	1	0	0	0	0	1997
737	4	1997-10-01	32	Papillomatous digital dermatitis on a commercial dairy farm in Mexicali, Mexico: Incidence and effect on reproduction and milk production	l	1	1	1	0	1	1	0	1	0	1	1	0	1997
738	4	1997-10-01	32	Reducing a spatial database to its effective dimensionality for logistic-regression analysis of incidence of livestock disease	l	0	1	1	0	0	1	0	0	0	0	0	0	1997
739	4	1997-10-01	32	Relationships between the presence of Johne’s disease and farm and management factors in dairy cattle in England	l	0	0	1	1	1	1	0	1	0	0	1	0	1997
740	4	1997-10-01	32	Returns from strategic anthelmintic treatments in village cattle in the Gambia	l	0	1	0	0	1	1	0	0	0	1	0	0	1997
741	4	1997-10-01	32	The prevalence of proliferative kidney disease from the kidney and muscle of rainbow and brown trout in Arag6n (Spain)	a	0	1	1	0	0	1	1	1	0	0	1	0	1997
742	4	1998-12-01	37	A Cox proportional-hazards model with time-dependent covariates to evaluate the relationship between body-condition score and the risks of first insemination and pregnancy in a high-producing dairy herd	l	0	1	1	0	0	1	1	1	0	0	1	0	1998
743	4	1998-12-01	37	Adaptation and validation of antibody-ELISA using dried blood spots on filter paper for epidemiological surveys of tsetse-transmitted trypanosomosis in cattle	l	0	0	0	0	0	0	0	0	0	0	0	0	1998
744	4	1998-12-01	37	Adaptive conjoint analysis to determine perceived risk factors of farmers, veterinarians and AI technicians for introduction of BHV1 to dairy farms	l	0	1	1	0	0	1	1	1	0	0	0	0	1998
745	4	1998-12-01	37	Associations between use of electric cow-trainers and clinical diseases, reproductive performance and culling in Swedish dairy cattle	l	0	1	1	1	0	1	1	1	0	0	0	0	1998
746	4	1998-12-01	37	Efficacy of amitraz (Taktic1 12.5% EC) as a dip for the control of Boophilus microplus (Canestrini) (Acari: Ixodidae) on cattle1	l	0	1	0	0	0	1	0	1	0	0	0	0	1998
747	4	1998-12-01	37	Immunoglobulin G concentration and neonatal survival of goat kids delivered in a pen or on open range	l	1	1	1	0	1	1	0	1	0	0	1	0	1998
748	4	1998-12-01	37	Incidence risk and aetiology of mammary abnormalities in dry ewes in 10 flocks in Southern Greece	p	0	1	0	0	0	1	0	1	1	1	0	1	1998
749	4	1998-12-01	37	Interactions between the associations of parity, lactation length, and weaning-to-conception interval with subsequent litter size in swine herds using early weaning	l	0	1	1	1	0	0	0	0	0	0	0	0	1998
750	4	1998-12-01	37	Management-related risk factors for M. paratuberculosis infection in Michigan, USA, dairy herds	l	0	1	1	0	0	0	0	1	1	0	1	0	1998
751	4	1998-12-01	37	Mortality attributed to respiratory problems among finisher pigs in the United States	l	0	0	1	0	0	0	0	1	0	0	1	0	1998
752	4	1998-12-01	37	Papillomatous digital dermatitis in Chilean dairies and evaluation of a screening method	l	0	1	0	0	0	1	0	0	0	1	0	1	1998
753	4	1998-12-01	37	Quantitative risk assessment of human listeriosis from consumption of soft cheese made from raw milk	o	0	0	0	0	0	0	0	0	0	0	0	0	1998
754	4	1998-12-01	37	Risk factors for brucellosis seropositivity of goat herds in the Mexicali Valley of Baja California, Mexico	l	1	1	1	1	1	1	0	1	0	0	1	1	1998
755	4	1998-12-01	37	Seroepidemiology of rinderpest in bovids in Sri Lanka using the enzyme linked immunosorbent assay (ELISA) technique	w	0	0	0	0	0	0	0	0	0	0	0	0	1998
756	4	1998-12-01	37	Seroprevalence of enzootic bovine leukosis in Trakya district (Marmara region) in Turkey	l	1	1	0	1	1	1	0	1	0	0	1	0	1998
757	4	1998-12-01	37	Seroprevalence to bovine immunodeficiency virus and lack of association with leukocyte counts in Italian dairy cattle	l	0	1	0	0	1	1	0	0	0	0	1	0	1998
758	4	1998-12-01	37	The availability of state-level data on interstate cattle movements in the United States	l	0	0	0	0	0	0	0	0	0	0	0	0	1998
759	4	1998-12-01	37	Using a tobit regression model to analyse risk factors for foot-pad dermatitis in commercially grown broilers	p	1	1	1	1	1	1	0	1	0	0	0	0	1998
760	4	1999-12-01	42	A model to estimate the financial consequences of classical swine fever outbreaks: principles and outcomes	l	0	0	0	0	0	0	0	0	0	0	0	0	1999
761	4	1999-12-01	42	Classical swine fever in The Netherlands 1997±1998: a description of organisation and measures to eradicate the disease	l	0	0	0	0	0	0	0	0	0	0	0	0	1999
762	4	1999-12-01	42	Laboratory decision-making during the classical swine fever epidemic of 1997±1998 in The Netherlands	l	0	0	0	0	0	0	0	0	0	0	0	0	1999
763	4	1999-12-01	42	Quantification of the transmission of classical swine fever virus between herds during the 1997±1998 epidemic in The Netherlands	l	0	1	0	0	1	1	0	1	0	1	1	0	1999
764	4	1999-12-01	42	Spatial and stochastic simulation to evaluate the impact of events and control measures on the 1997±1998 classical swine fever epidemic in The Netherlands. II. Comparison of control strategies	l	0	1	1	0	0	1	1	1	0	0	0	0	1999
765	4	1999-12-01	42	Spatial and stochastic simulation to evaluate the impact of events and control measures on the 1997±1998 classical swine fever epidemic in The Netherlands. I. Description of simulation model	l	0	0	0	0	0	0	0	0	0	0	0	1	1999
766	4	1999-12-01	42	The 1997-1998 classical swine fever epidemic in The Netherlands Ð a survival analysis	l	0	1	1	0	1	1	0	1	0	0	1	0	1999
767	4	1999-12-01	42	The classical swine fever epidemic 1997±1998 in the Netherlands: descriptive epidemiology	l	0	0	0	0	0	0	0	0	0	0	0	0	1999
768	4	1999-12-01	42	Transmission of classical swine fever virus within herds during the 1997±1998 epidemic in The Netherlands	l	0	0	0	1	1	0	0	1	1	1	1	0	1999
769	4	2000-12-01	47	Experimental infectious pancreatic necrosis infections: propagative or point-source epidemic?	a	0	1	1	0	0	0	0	0	0	1	1	0	2000
770	4	2000-12-01	47	Models for the dispersal in Australia of the arbovirus vector, Culicoides brevitarsis Kieffer (Diptera: Ceratopogonidae)	o	0	1	0	0	0	1	0	1	0	1	1	1	2000
771	4	2000-12-01	47	Prevalence of contagious bovine pleuropneumonia (CBPP) in northern Nigeria	l	0	0	0	0	1	0	0	0	1	0	1	0	2000
772	4	2000-12-01	47	Prevalence of vancomycin-resistant Enterococcus faecium (VREF) in pig faeces from slaughterhouses in Spain	l	0	0	0	0	0	0	0	0	1	1	1	1	2000
773	4	2000-12-01	47	The limitations of a feed/water based heat-stable vaccine delivery system for Newcastle disease-control strategies for backyard poultry flocks in sub-Saharan Africa	p	0	0	0	0	0	0	0	0	0	0	0	0	2000
774	4	2001-12-01	52	Choropleth mapping of regional count data of Echinococcus multilocularis among red foxes in Lower Saxony, Germany	w	0	0	0	0	1	1	0	1	0	0	0	0	2001
775	4	2001-12-01	52	Dairy-cattle health in Gyeongnam, Korea	l	0	0	0	0	0	0	0	0	0	0	0	0	2001
776	4	2001-12-01	52	Estimating transfer of bovine virus-diarrhoea virus in Danish cattle by use of register data	l	0	0	0	0	0	0	0	0	0	0	0	0	2001
777	4	2001-12-01	52	Herd-level risk factors associated with Leptospira spp. seroprevalence in dairy and beef cattle in Spain	l	1	1	1	0	1	1	0	1	0	0	1	0	2001
778	4	2001-12-01	52	No simple association between time elapsed from seroconversion until slaughter and the extent of lung lesions in Danish swine	l	0	1	0	0	0	1	0	1	0	1	1	0	2001
779	4	2001-12-01	52	Risk factors for Brucella seropositivity in goat herds in eastern and western Uganda	l	0	1	1	1	0	1	0	1	1	1	1	1	2001
780	4	2002-12-01	56	The effect of eprinomectin treatment at calving on reproduction parameters in adult dairy cows in Canada	l	1	1	1	1	1	1	1	1	1	0	1	0	2002
781	4	2002-12-01	56	A review of approaches to quality assurance of veterinary systems for health-status certification	o	0	0	0	0	0	0	0	0	0	0	0	0	2002
782	4	2002-12-01	56	Assessing the efficacy of a ram-genotyping programme to reduce susceptibility to scrapie in Great Britain	l	0	0	0	0	0	0	0	0	0	0	0	0	2002
783	4	2002-12-01	56	Bulk milk testing for antibody seroprevalences to BVDV and BHV-1 in a rural region of Peru	l	0	1	0	0	0	0	0	0	0	0	1	0	2002
784	4	2002-12-01	56	Clustering of reported cases of leptospirosis among dogs in the United States and Canada	s	0	0	0	0	0	1	0	0	0	1	1	0	2002
785	4	2002-12-01	56	Neonatal-piglet weight variation and its relation to pre-weaning mortality and weight gain on commercial farms	l	0	0	1	0	0	0	1	1	0	0	0	0	2002
786	4	2002-12-01	56	Risk-based design of repeated surveys for the documentation of freedom from non-highly contagious diseases	l	0	0	0	0	0	0	0	0	0	0	0	0	2002
787	4	2002-12-01	56	Risk factors for the hazard of lameness in Danish Standardbred trotters	h	0	0	0	0	1	0	0	1	1	0	1	0	2002
788	4	2002-12-01	56	Seasonality of canine leptospirosis in the United States and Canada and its association with rainfall	s	0	1	1	0	1	1	0	0	0	0	1	1	2002
789	4	2002-12-01	56	Simulated effect of pig-population density on epidemic size and choice of control strategy for classical swine fever epidemics in The Netherlands	l	0	0	0	0	1	0	0	0	0	0	1	1	2002
790	4	2003-12-01	61	An initial survey of the cattle grub Dermatobia hominis (L. Jr.) in Nicaragua	l	0	0	0	0	0	0	0	0	0	0	0	0	2003
791	4	2003-12-01	61	Association between bovine-leukosis virus seroprevalence and herd-level productivity on US dairy farms	l	0	1	1	0	0	1	0	1	0	0	0	0	2003
792	4	2003-12-01	61	Brucellosis and Q-fever seroprevalences of nomadic pastoralists and their livestock in Chad	l	0	1	1	1	1	1	0	1	0	1	1	0	2003
793	4	2003-12-01	61	Comparison of milk production of dairy cows kept in cold and warm loose-housing systems	l	0	1	1	0	1	1	0	1	0	1	0	0	2003
794	4	2003-12-01	61	Evaluation of an absorbed ELISA and an agar-gel immuno-diffusion test for ovine paratuberculosis in sheep in Australia	l	0	1	1	0	1	1	1	1	1	1	1	0	2003
795	4	2003-12-01	61	Monte Carlo simulation of flock-level sensitivity of abattoir surveillance for ovine paratuberculosis	l	0	0	0	0	0	0	0	1	0	1	0	1	2003
796	4	2003-12-01	61	Neighbourhood infections of classical swine fever during the 1997–1998 epidemic in The Netherlands	l	0	0	1	1	0	0	0	1	0	1	1	1	2003
797	4	2003-12-01	61	Path analysis of subsistence farmers’ use of veterinary services in Zimbabwe	o	0	1	1	0	0	1	1	1	0	0	0	0	2003
798	4	2004-12-01	66	Ability of veterinary pathologists to diagnose classical swine fever from clinical signs and gross pathological findings	o	0	1	0	0	1	1	0	0	0	0	1	0	2004
799	4	2004-12-01	66	A biological network describing infection with Mycoplasma hyopneumoniae in swine herds	l	0	0	0	0	0	0	0	0	0	0	0	0	2004
800	4	2004-12-01	66	A cross-sectional study of epizootic lymphangitis in cart-mules in western Ethiopia	h	1	1	1	0	1	1	0	0	1	0	1	0	2004
801	4	2004-12-01	66	Age–period–cohort analysis of the Bovine Spongiform Encephalopathy (BSE) epidemic in Switzerland	o	0	0	0	0	0	0	0	0	0	1	1	1	2004
802	4	2004-12-01	66	Associations between management, climate, and Escherichia coli O157 in the faeces of feedlot cattle in the Midwestern USA	l	0	1	1	0	0	1	1	1	0	1	1	0	2004
803	4	2004-12-01	66	Bayesian modeling of animal- and herd-level prevalences	o	0	0	0	0	0	0	0	0	0	0	0	0	2004
804	4	2004-12-01	66	Biosecurity in 116 Danish fattening swineherds: descriptive results and factor analysis	l	0	0	0	0	0	1	0	1	0	0	0	0	2004
805	4	2004-12-01	66	Duration of immunity of a quadrivalent vaccine against respiratory diseases caused by BHV-1, PI3V, BVDV, and BRSV in experimentally infected calves	l	0	1	0	0	0	1	0	0	0	0	0	0	2004
806	4	2004-12-01	66	Effects of diseases on reproductive performance in Swedish Red and White dairy cattle	l	0	0	0	0	1	1	0	1	0	0	0	0	2004
807	4	2004-12-01	66	Estimation of the age-dependent risk of infection to BSE of dairy cattle in Great Britain	l	0	0	0	0	0	0	0	0	0	1	1	1	2004
808	4	2004-12-01	66	Factors associated with the presence of Escherichia coli O157 in feedlot–cattle water and feed in the Midwestern USA	l	0	1	1	0	0	0	1	1	0	0	1	0	2004
809	4	2004-12-01	66	Health and welfare of dairy cows in different husbandry systems in Switzerland	l	0	0	1	0	0	1	1	1	0	0	1	0	2004
810	4	2004-12-01	66	Probability of introduction of exotic strains of bluetongue virus into the US and into California through importation of infected cattle	l	0	1	0	0	0	0	0	0	0	0	0	0	2004
811	4	2004-12-01	66	Quantification of the spread of Mycoplasma hyopneumoniae in nursery pigs using transmission experiments	l	1	1	0	0	1	1	0	1	0	1	0	0	2004
812	4	2004-12-01	66	Risk factors for herdsman-reported foot-and-mouth disease in the Adamawa Province of Cameroon	l	0	1	1	0	0	1	0	1	0	0	1	0	2004
813	4	2004-12-01	66	Strategies for two-stage sampling designs for estimating herd-level prevalence	l	0	0	0	0	0	0	0	0	0	1	0	0	2004
814	4	2004-12-01	66	The effect of antimicrobial growth promoter withdrawal on the health of weaned pigs in Finland	l	0	1	0	0	1	1	0	1	0	0	0	0	2004
815	4	2005-12-01	72	Bovine viral diarrhoea virus in beef cattle herds of Yucatan, Mexico: Seroprevalence and risk factors	l	1	1	1	0	1	1	0	0	0	1	1	1	2005
816	4	2005-12-01	72	Cow-level evaluation of a kinetics ELISA with multiple cutoff values to detect fecal shedding of Mycobacterium avium subspecies paratuberculosis in New York State dairy cows	l	0	0	1	0	0	1	0	0	0	1	1	0	2005
817	4	2005-12-01	72	Factor analysis of a Johne’s disease risk assessment questionnaire with evaluation of factor scores and a subset of original questions as predictors of observed clinical paratuberculosis	o	0	1	1	0	0	1	0	1	0	0	0	0	2005
818	4	2005-12-01	72	Risk factors for outbreaks of infectious salmon anemia in farmed Atlantic salmon, Salmo salar	a	0	1	1	0	0	1	0	1	0	1	1	0	2005
819	4	2005-12-01	72	The effective life of ivermectin on Western Australian sheep farms—A survival analysis	l	1	1	1	0	1	1	0	1	0	1	1	0	2005
820	4	2005-12-01	72	The effects of different knowledge-dissemination interventions on the mastitis knowledge of Tanzanian smallholder dairy farmers	l	1	1	1	0	1	1	1	0	1	0	1	0	2005
821	4	2005-12-01	72	The public health implications of farming cattle in areas with high background concentrations of vanadium	l	0	0	0	0	0	0	0	1	0	0	0	0	2005
822	4	2006-12-01	77	A cross-sectional survey of Australian chicken farms to identify risk factors associated with seropositivity to Newcastle-disease virus	p	0	1	1	1	1	0	0	1	0	0	1	0	2006
823	4	2006-12-01	77	An epidemiologic study of late-term abortions in dairy cattle in Denmark, July 2000–August 2003	l	1	1	0	1	1	1	0	1	0	1	0	1	2006
824	4	2006-12-01	77	Effect of Neospora caninum-serostatus on culling, reproductive performance and milk production in Dutch dairy herds with and without a history of Neospora caninum-associated abortion epidemics	l	0	0	1	0	0	1	0	1	1	0	1	1	2006
825	4	2006-12-01	77	Evaluation of a contract breeding management program in selected Ohio dairy herds with event-time analysis I. Cox proportional hazards models	l	0	1	1	0	1	1	0	1	1	1	1	0	2006
826	4	2006-12-01	77	Financial analysis of various strategies for the control of Neospora caninum in dairy cattle in Switzerland	l	0	0	0	0	0	1	0	1	0	1	1	1	2006
827	4	2006-12-01	77	Quantification of the contact structure in a feral cattle population and its hypothetical effect on the transmission of bovine herpesvirus 1	l	0	1	0	0	1	1	0	0	0	1	1	0	2006
828	4	2006-12-01	77	Simulating the impact of four control strategies on the population dynamics of Neospora caninum infection in Swiss dairy cattle	l	0	0	1	0	0	1	1	1	0	1	1	1	2006
829	4	2006-12-01	77	Management of feral domestic cats in the urban environment of Rome (Italy)		0	1	0	1	0	0	0	0	0	0	0	0	2006
830	4	2006-12-01	77	Simulation model estimates of test accuracy and predictive values for the Danish Salmonella surveillance program in dairy herds	l	0	0	0	0	0	0	0	0	0	0	1	0	2006
831	4	2007-12-01	82	A case–control study of risk factors for brucellosis seropositivity in Portuguese small ruminants herds	l	1	1	1	0	0	1	1	1	0	0	1	0	2007
832	4	2007-12-01	82	A descriptive survey of lesions from cull sows harvested at two Midwestern U.S. facilities	l	1	1	1	0	0	1	0	0	0	0	0	0	2007
833	4	2007-12-01	82	Effectiveness of movement-prevention regulations to reduce the spread of foot-and-mouth disease in The Netherlands	l	0	1	0	0	1	0	0	0	0	0	0	0	2007
834	4	2007-12-01	82	Estimating the prevalence of BSE in dairy birth cohorts and predicting the incidence of BSE cases in Japan	l	0	0	0	0	0	1	0	1	1	1	1	1	2007
835	4	2007-12-01	82	Seroprevalence of and risk factors for brucellosis of goats in herds of Michoacan, Mexico	l	0	1	1	0	0	1	1	1	1	1	1	0	2007
836	4	2007-12-01	82	The characterization of Salmonella serovars isolated from apparently healthy slaughtered pigs at Addis Ababa abattoir, Ethiopia	l	0	1	0	1	0	1	0	1	0	1	1	1	2007
837	4	2007-12-01	82	The North American Animal Disease Spread Model: A simulation model to assist decision making in evaluating animal disease incursions	o	0	0	0	0	0	0	0	1	0	0	0	0	2007
838	4	2007-12-01	82	Validation of computerized Swedish horse insurance data against veterinary clinical records	h	0	1	1	0	1	1	0	1	0	1	1	0	2007
839	4	2008-11-01	87	An exploration of the drivers to bio-security collective action among a sample of UK cattle and sheep farmers	l	0	1	0	0	1	1	0	0	0	1	0	0	2008
840	4	2008-11-01	87	Evaluating the use of packed cell volume as an indicator of trypanosomal infections in cattle in eastern Zambia	l	0	1	0	0	1	1	0	0	0	1	0	0	2008
841	4	2008-11-01	87	Farmer estimation of live bodyweight of cattle: Implications for veterinary drug dosing in East Africa	l	0	1	0	0	1	1	0	0	0	1	0	0	2008
842	4	2008-11-01	87	Individual animal risk factors for clinical mastitis in meat sheep in Norway	l	0	1	1	0	0	1	0	1	0	0	1	0	2008
843	4	2008-11-01	87	Molecular epidemiology of Mycobacterium bovis: Usefulness in international trade	o	0	1	1	0	0	1	0	0	0	0	0	0	2008
844	4	2008-11-01	87	Prevalence of VTEC O157 in dairy and veal herds and risk factors for veal herds	l	1	1	1	0	1	1	1	1	1	1	1	0	2008
845	4	2008-11-01	87	Rearing conditions, morbidity and breeding performance in dairy heifers in southwest Sweden	l	0	1	0	0	0	1	1	1	0	0	0	0	2008
846	4	2008-11-01	87	Risk factors and impacts of clinical and subclinical mastitis in commercial meat-producing sheep flocks in Quebec, Canada	l	0	1	1	0	0	1	1	1	0	1	1	0	2008
847	4	2008-11-01	87	Risk factors for time to diagnosis of feline upper respiratory tract disease in UK animal adoption shelters	s	0	1	1	1	0	1	0	1	0	1	1	0	2008
848	4	2008-11-01	87	Towards a risk-based surveillance for Trichinella spp. in Danish pig production	l	0	0	0	0	0	0	0	1	0	1	0	0	2008
849	4	2008-11-01	87	Trace micro-nutrients may affect susceptibility to bovine tuberculosis in cattle	l	1	1	1	1	0	1	0	1	1	0	1	0	2008
850	4	2008-11-01	87	Use of heterogeneous operation-specific contact parameters changes predictions for foot-and-mouth disease outbreaks in complex simulation models	o	0	1	1	0	0	1	0	1	0	0	0	0	2008
851	4	2009-12-01	92	A flock-tailored early warning system for low pathogenic avian influenza (LPAI) in commercial egg laying flocks	p	0	1	0	0	0	1	0	0	0	0	0	0	2009
852	4	2009-12-01	92	Dog obesity: Owner attitudes and behaviour	s	1	1	0	0	1	1	0	1	0	0	0	0	2009
853	4	2009-12-01	92	Education of global veterinarians	o	0		0		0		0		0		0		2009
854	4	2009-12-01	92	Evolution of a transdisciplinary ‘‘One Medicine–One Health’’ approach to global health education at the University of California, Davis	o	0				1				0				2009
855	4	2009-12-01	92	Factors affecting persistence of high Salmonella serology in Danish pig herds	l	1	1	1	0	1	1	1	1	0	0	1	0	2009
856	4	2009-12-01	92	Global thinking and global education: Philosophy, programs, perspectives	o	0				0				0				2009
857	4	2009-12-01	92	Herd size and bovine tuberculosis persistence in cattle farms in Great Britain	l	0	0	0	0	0	0	0	0	0	0	0	0	2009
858	4	2009-12-01	92	Meta-analytical equivalence studies on diagnostic tests for bovine brucellosis allowing assessment of a test against a group of comparative tests	o	1	1	1	1	0	1	0	0	0	0	1	1	2009
859	4	2009-12-01	92	Network analysis of Italian cattle trade patterns and evaluation of risks for potential disease spread	l	0	0	0	0	0	0	0	0	0	0	0	0	2009
860	4	2009-12-01	92	Preferences of cost factors for mastitis management among Dutch dairy farmers using adaptive conjoint analysis	l	0	1	0	1	0	1	0	1	0	0	0	0	2009
861	4	2009-12-01	92	PrP genotype: A flock-level risk factor for scrapie?	l	0	1	1	0	0	1	0	1	0	1	1	0	2009
862	4	2009-12-01	92	Risk-based sample size calculation for consecutive surveys to document freedom from animal diseases	o	0	0	0	0	0	0	0	0	0	0	0	0	2009
863	4	2009-12-01	92	The role of veterinary epidemiology in combating infectious animal diseases on a global scale: The impact of training and outreach programs	o	0	0	0	0	0	0	0	0	0	0	0	0	2009
864	4	2009-12-01	92	Veterinary epidemiology in Latin America	o	0	0	0	0	0	0	0	0	0	0	0	0	2009
865	4	2010-12-01	97	A prospective study on Canine Hip Dysplasia and growth in a cohort of four large breeds in Norway (1998–2001)	s	1	1	1	1	1	1	0	1	0	1	1	1	2010
866	4	2010-12-01	97	Assessing the impact of East Coast Fever immunisation by the infection and treatment method in Tanzanian pastoralist systems	o	1	1	0	0	1	1	0	1	0	0	0	0	2010
867	4	2010-12-01	97	Changing expectations: Do journals drive methodological changes? Should they?	o	0		0		0		0		0		0		2010
868	4	2010-12-01	97	Correlated time to event data: Modeling repeated clinical mastitis data from dairy cattle in New York State	l	0	0	1	0	0	0	0	0	0	0	0	0	2010
869	4	2010-12-01	97	Epidemiological research and evidence based medicine: How do they fit and for whom	o	0				0				0				2010
870	4	2010-12-01	97	Factors associated with changes of state of foot conformation and lameness in a flock of sheep	l	0	1	0	0	0	1	0	0	0	0	1	0	2010
871	4	2010-12-01	97	Field trial of a synthetic tsetse-repellent technology developed for the control of bovine trypanosomosis in Kenya	o	1	1	1	0	0	1	0	1	0	1	1	0	2010
872	4	2010-12-01	97	Heat-related mortality in dairy cattle: A case crossover study	l	0	0	0	0	0	0	0	0	0	1	1	0	2010
873	4	2010-12-01	97	High prevalence of porcine circovirus viremia in newborn piglets in five clinically normal swine breeding herds in North America	l	0	1	1	1	0	1	1	1	0	0	1	0	2010
874	4	2010-12-01	97	Predicting prolonged bovine tuberculosis breakdowns in Great Britain as an aid to control	o	0	1	1	0	0	1	0	0	1	1	1	0	2010
875	4	2010-12-01	97	Prevalence and risk factors for Salmonella spp. contamination in French broiler-chicken flocks at the end of the rearing period	p	0	1	1	1	0	0	0	1	1	1	1	1	2010
876	4	2010-12-01	97	Quality standards are needed for reporting of test accuracy studies for animal diseases	o	0				0				0				2010
877	4	2010-12-01	97	Reporting guidelines for primary research: Saying what you did	o	0				0				0				2010
878	4	2010-12-01	97	Temporal distributions of respiratory disease events within cohorts of feedlot cattle and associations with cattle health and performance indices	l	0	1	1	0	1	1	0	1	0	1	1	1	2010
879	4	2011-12-01	102	An evaluation of Foot-and-Mouth Disease outbreak reporting in mainland South-East Asia from 2000 to 2010	o	0	1	0	0	1	1	1	1	0	0	0	0	2011
880	4	2011-12-01	102	Assessing human–dog conflicts in Todos Santos, Guatemala: Bite incidences and public perception	s	0	1	1	1	1	1	1	1	0	0	0	0	2011
881	4	2011-12-01	102	Cartographical analysis of African swine fever outbreaks in the territory of the Russian Federation and computer modeling of the basic reproduction ratio	l	0	0	1	0	1	1	1	0	0	1	1	0	2011
882	4	2011-12-01	102	Epidemiological aspects and financial impact of lumpy skin disease in Ethiopia	l	1	1	1	0	1	1	0	1	1	1	1	0	2011
883	4	2011-12-01	102	Farm-level reproduction number during an epidemic of infectious salmon anemia virus in southern Chile in 2007–2009	a	1	1	0	0	1	1	1	1	0	1	0	0	2011
884	4	2011-12-01	102	Horse owners’ biosecurity practices following the first equine influenza outbreak in Australia	h	1	1	1	1	0	1	1	1	0	0	1	0	2011
885	4	2011-12-01	102	Impacts of a freedom farrowing pen design on sow behaviours and performance	l	1	1	1	0	0	1	1	1	0	0	0	0	2011
886	4	2011-12-01	102	Metapopulation dynamics and determinants of H5N1 highly pathogenic avian influenza outbreaks in Indonesian poultry	p	0	0	0	0	1	1	0	0	0	1	0	0	2011
887	4	2011-12-01	102	Perceived risk and strategy efficacy as motivators of risk management strategy adoption to prevent animal diseases in pig farming	l	0	1	1	1	0	1	0	1	0	0	0	0	2011
888	4	2011-12-01	102	Ranking freshwater fish farms for the risk of pathogen introduction and spread	a	0		0	0	0		0	1	0		0	0	2011
889	4	2011-12-01	102	Relationship between somatic cell count status and subsequent clinical mastitis in Dutch dairy cows	l	0	1	0	0	0	1	1	1	0	0	1	0	2011
890	4	2011-12-01	102	Risk-based surveillance for avian influenza control along poultry market chains in South China: The value of social network analysis	p	0	1	1	0	1	1	1	1	0	0	1	0	2011
891	4	2011-12-01	102	Shorter-term risk of Mycobacterium bovis in Irish cattle following an inconclusive diagnosis to the single intradermal comparative tuberculin test	l	0	1	1	1	0	1	0	1	0	1	1	0	2011
892	4	2011-12-01	102	The effect of neighbourhood definitions on spatio-temporal models of disease outbreaks: Separation distance versus range overlap	w	0	0	0	0	0	0	0	0	0	0	0	0	2011
893	4	2011-12-01	102	The importance of location in contact networks: Describing early epidemic spread using spatial social network analysis	o	0	1	1	0	0	1	0	1	0	0	0	0	2011
894	4	2011-12-01	102	Toxoplasma gondii in Romanian household cats: Evaluation of serological tests, epidemiology and risk factors	s	0	1	1	0	1	1	0	1	1	1	1	1	2011
895	4	2011-12-01	102	Utilizing a combination of molecular and spatial tools to assess the effect of a public health intervention	o	0	1	0	0	0	1	0	1	0	1	0	0	2011
896	4	2012-12-01	107	A description of the demographic characteristics of the New Zealand non-commercial horse population with data collected using a generalised random-tessellation stratified sampling design	h	0	1	1	0	1	1	0	1	0	0	1	0	2012
897	4	2012-12-01	107	A structural equation model to evaluate direct and indirect factors associated with a latent measure of mastitis in Belgian dairy herds	l	1	1	1	0	0	1	1	0	0	0	0	0	2012
898	4	2012-12-01	107	Cattle producers’ economic incentives for preventing bovine brucellosis under uncertainty	l	0	0	0	0	0	0	0	0	0	0	0	0	2012
899	4	2012-12-01	107	Dynamics of MRSA carriage in veal calves: A longitudinal field study	l	0	1	0	0	0	0	0	0	0	1	0	0	2012
900	4	2012-12-01	107	Effects of culling Eurasian wild boar on the prevalence of Mycobacterium bovis and Aujeszky’s disease virus	w	0	1	1	0	1	1	1	1	0	0	0	0	2012
901	4	2012-12-01	107	Epidemiological investigation of Renibacterium salmoninarum in three Oncorhynchus spp. in Michigan from 2001 to 2010	a	0	1	0	0	0	1	0	1	0	0	0	0	2012
902	4	2012-12-01	107	Housing conditions and management practices associated with neonatal lamb mortality in sheep flocks in Norway	l	0	1	1	0	0	1	1	1	0	0	1	0	2012
903	4	2012-12-01	107	Survival analysis of factors affecting incidence risk of Salmonella Dublin in Danish dairy herds during a 7-year surveillance period	l	1	1	1	0	0	1	1	1	0	1	1	0	2012
904	4	2012-12-01	107	The risk of introducing scrapie from restocking goats in Great Britain	l	0	0	0	0	0	0	0	1	0	0	0	0	2012
905	4	2012-12-01	107	Using egg production data to quantify within-flock transmission of low pathogenic avian influenza virus in commercial layer chickens	p	0	1	0	0	0	1	1	1	0	1	1	0	2012
906	4	2012-12-01	107	Validation of Nordic dairy cattle disease recording databases—Completeness for locomotor disorders	l	0	0	0	0	1	1	0	0	1	1	1	0	2012
907	4	2013-11-01	112	Adjusting for multiple clinical observers in an unbalancedstudy design using latent class models of true within-herdlameness prevalence in Danish dairy herds	l	0	0	0	0	0	0	0	0	0	0	0	0	2013
908	4	2013-11-01	112	A double-blind block randomized clinical trial on the effect ofzinc as a treatment for diarrhea in neonatal Holstein calvesunder natural challenge conditions	l	0	1	1	1	1	1	1	1	0	0	1	0	2013
909	4	2013-11-01	112	An approach to model monitoring and surveillance data ofwildlife diseases—Exemplified by Classical Swine Fever inwild boar	w	0	0	0	0	0	0	0	1	0	1	1	1	2013
910	4	2013-11-01	112	A national-scale picture of U.S. cattle movements obtainedfrom Interstate Certificate of Veterinary Inspection data	l	0	1	0	0	1	1	0	0	0	1	1	0	2013
911	4	2013-11-01	112	Bayesian estimation of test characteristics of real-time PCR,bacteriological culture and California mastitis test fordiagnosis of intramammary infections with Staphylococcusaureus in dairy cattle at routine milk recordings	l	0	0	0	0	0	1	0	1	0	0	0	1	2013
912	4	2013-11-01	112	Can early host responses to mycobacterial infection predicteventual disease outcomes?	l	0	1	1	0	1	1	1	1	0	1	1	0	2013
913	4	2013-11-01	112	Days-lost to training and competition in relation to workloadin 263 elite show-jumping horses in four European countries	h	0	1	1	1	1	1	0	1	0	0	1	0	2013
914	4	2013-11-01	112	Decisions on control of foot-and-mouth disease informedusing model predictions	l	1	1	1	1	1	1	1	1	0	0	0	0	2013
915	4	2013-11-01	112	Description and factors of variation of the overall healthscore in French dairy cattle herds using the Welfare Quality®assessment protocol	l	1	1	1	0	0	0	1	1	0	0	1	0	2013
916	4	2013-11-01	112	Different herd level factors associated with H1N1 or H1N2influenza virus infections in fattening pigs	l	1	1	1	0	0	1	1	1	1	1	1	0	2013
917	4	2013-11-01	112	Evidence of birth seasonality and clustering of Mycobacteriumavium subspecies paratuberculosis infection in US dairy herds	l	1	1	1	1	1	1	1	1	1	1	1	0	2013
918	4	2013-11-01	112	Factors influencing the demand of the service of communitybased animal health care in Zimbabwe	u	0	0	1	0	1	0	0	1	0	1	0	1	2013
919	4	2013-11-01	112	Free-roaming dog populations: A cost-benefit model fordifferent management options, applied to Abruzzo, Italy	s	0	0	1	0	0	1	0	1	0	0	0	0	2013
920	4	2013-11-01	112	Mathematical model of the 2010 foot-and-mouth diseaseepidemic in Japan and evaluation of control measures	o	0	0	0	0	0	0	0	1	0	0	0	0	2013
921	4	2013-11-01	112	Minimization of bovine tuberculosis control costs in USdairy herds	l	0	0	0	0	1	1	0	0	0	0	0	0	2013
922	4	2013-11-01	112	Modelling the expected rate of laboratory biosafetybreakdowns involving rinderpest virus in thepost-eradication era	o	0	0	0	0	0	0	0	0	0	0	0	0	2013
923	4	2013-11-01	112	Perceptions of veterinarians in bovine practice and producerswith beef cow-calf operations enrolled in the US VoluntaryBovine Johne’s Disease Control Program concerningeconomic losses associated with Johne’s disease	l	1	1	1	0	0	1	0	1	0	0	1	0	2013
924	4	2013-11-01	112	Prognostic factors of early metastasis and mortality in dogswith appendicular osteosarcoma after receiving surgery:An individual patient data meta-analysis	s	0	0	1	0	0	1	0	0	1	1	1	1	2013
925	4	2013-11-01	112	Relative associations of cattle movements, local spread,and biosecurity with bovine viral diarrhoea virus (BVDV)seropositivity in beef and dairy herds	l	0	1	1	0	0	1	0	1	0	1	1	0	2013
926	4	2013-11-01	112	Riders’ prediction of results at Fédération EquestreInternationale (FEI) endurance rides and sources of bias inquestionnaires completed by riders	o	0	1	1	0	0	1	1	1	0	0	1	0	2013
927	4	2013-11-01	112	Sheep farmeropinionsonthecurrentandfutureroleof veterinarians inflockhealthmanagementonsheepfarms: A qualitativestudy	l	0	0	0	0	0	0	0	0	0	0	0	0	2013
928	4	2013-11-01	112	Spatial and temporal interactions between livestock andwildlife in South Central Spain assessed by camera traps	m	0	1	0	0	0	1	0	0	0	1	0	0	2013
929	4	2013-11-01	112	Transdisciplinary research for complex One Health issues:A scoping review of key concepts	o	0	0	0	0	0	0	0	0	0	0	0	0	2013
930	4	2013-11-01	112	Use of a multi-criteria analysis framework to inform thedesign of risk based general surveillance systems for animaldisease in Australia	o	0	0	0	0	1	1	0	0	0	0	0	0	2013
931	4	2014-12-01	117	Abattoir based survey of Salmonella in finishing pigs in theUnited Kingdom 2006–2007	l	1	1	1	0	1	1	1	1	0	0	0	0	2014
932	4	2014-12-01	117	Bridge hosts for avian influenza viruses at thewildlife/domestic interface: An eco-epidemiologicalframework implemented in southern Africa	m	0	0	1	0	0	1	1	1	0	1	0	0	2014
933	4	2014-12-01	117	Cost assessment of the movement restriction policy in Franceduring the 2006 bluetongue virus episode (BTV-8)	l	0	0	1	0	1	1	0	1	0	0	1	0	2014
934	4	2014-12-01	117	Distribution of cow–calf producers’ beliefs about reportingcattle with clinical signs of foot-and-mouth disease to aveterinarian before or during a hypothetical outbreak	l	0	1	1	1	0	1	0	0	0	0	0	0	2014
935	4	2014-12-01	117	Distribution of cow-calf producers’ beliefs regardinggathering and holding their cattle and observing animalmovement restrictions during an outbreak offoot-and-mouth disease	l	0	1		0	0	1		0	0	0		0	2014
936	4	2014-12-01	117	Efficiency of dairy farms participating and not participatingin veterinary herd health management programs	l	1	1	1	0	1	1	0	1	0	0	0	0	2014
937	4	2014-12-01	117	Estimating costs of sea lice control strategy in Norway	a	0	0	0	0	0	0	0	0	0	0	0	0	2014
938	4	2014-12-01	117	Estimating the population attributable fraction forschizophrenia when Toxoplasma gondii is assumed absent inhuman populations	o	0	1	0	0	0	0	0	0	1	1	1	1	2014
939	4	2014-12-01	117	Estimation of flock/herd-level true Mycobacterium aviumsubspecies paratuberculosis prevalence on sheep, beef cattleand deer farms in New Zealand using a novel Bayesian model	l	0	1	0	0	0	0	0	0	0	0	1	0	2014
940	4	2014-12-01	117	Evaluation of a behavioral assessment tool for dogsrelinquished to shelters	s	1	1	1	0	0	1	1	1	0	0	1	0	2014
941	4	2014-12-01	117	Modeling the impact of vaccination control strategies on afoot and mouth disease outbreak in the Central United States	l	0	0	1	0	0	1	0	0	0	0	0	0	2014
942	4	2014-12-01	117	Molecular epidemiology of Mycobacterium avium subsp.paratuberculosis isolated from sheep, cattle and deer on NewZealand pastoral farms	l	0	1	1	1	1	1	0	1	0	1	1	1	2014
943	4	2014-12-01	117	Options for managing animal welfare on intensive pig farmsconfined by movement restrictions during an outbreak offoot and mouth disease	l	0	0	1	0	0	1	1	1	0	0	0	0	2014
944	4	2014-12-01	117	Participatory assessment of animal health and husbandrypractices in smallholder pig production systems in three highpoverty districts in Uganda	l	0	0	0	0	0	0	0	0	0	0	0	0	2014
945	4	2014-12-01	117	Survival analysis of clinical mastitis data using a nestedfrailty Cox model fit as a mixed-effects Poisson model	l	0	1	1	1	0	1	0	1	0	1	1	1	2014
946	4	2014-12-01	117	Temporal relationship between decrease in antimicrobialprescription for Danish pigs and the “Yellow Card” legalintervention directed at reduction of antimicrobial use	l	0	0		1	0	0		1	0	0		0	2014
947	4	2015-12-01	122	A comparison of West Nile virus surveillance using survival analysesof dead corvid and mosquito pool data in Ontario, 2002–2008	o	0	1	1	0	0	1	0	1	0	1	1	0	2015
948	4	2015-12-01	122	A new compartmental model of Mycobacterium avium subsp.paratuberculosis infection dynamics in cattle	l	0	0	0	0	0	1	1	0	0	1	0	0	2015
949	4	2015-12-01	122	Applying participatory approaches in the evaluation of surveillancesystems: A pilot study on African swine fever surveillance in Corsica	m	0	0	0	0	0	0	0	0	0	0	0	0	2015
950	4	2015-12-01	122	Assessment of the probability of introduction of bovine tuberculosisto Danish cattle farms via imports of live cattle from abroad andimmigrant workers	l	0	0	0	0	0	0	0	0	0	0	0	0	2015
951	4	2015-12-01	122	Born to roam? Surveying cat owners in Tasmania, Australia, toidentify the drivers and barriers to cat containment	s	0	1	0	0	0	1	0	0	0	0	0	0	2015
952	4	2015-12-01	122	Comparison of mixed effects models of antimicrobial resistancemetrics of livestock and poultry Salmonella isolates from a nationalmonitoring system	m	0	1	1	0	1	1	0	1	0	0	0	0	2015
953	4	2015-12-01	122	Creating a model to detect dairy cattle farms with poor welfare usinga national database	l	1	1	0	0	1	1	0	1	0	0	0	0	2015
954	4	2015-12-01	122	Degenerative mitral valve disease: Survival of dogs attendingprimary-care practice in England	s	0	1	1	0	0	1	0	1	1	1	1	1	2015
955	4	2015-12-01	122	Design and prospective evaluation of a risk-based surveillance systemfor shrimp grow-out farms in northeast Brazil	a	0	0	0	0	0	0	0	0	0	0	0	0	2015
956	4	2015-12-01	122	Dogslife: A cohort study of Labrador Retrievers in the UK	s	0	1	1	0	0	1	0	0	0	1	1	0	2015
957	4	2015-12-01	122	A trend analysis of antimicrobial resistance in commensalEscherichia coli from several livestock species in Belgium (2011–2014)	l	0	1	1	1	1	1	1	1	0	1	0	0	2015
958	4	2015-12-01	122	Foot abscess in sheep: Evaluation of risk factors and managementoptions	l	0	1	1	0	0	1	0	1	1	0	1	0	2015
959	4	2015-12-01	122	Iso-population partition: An innovative epidemiological approach tomapping and analyzing spatially aggregated data	o	0	0	0	0	0	1	0	0	0	0	0	0	2015
960	4	2015-12-01	122	Mapping the benefit-cost ratios of interventions against bovinetrypanosomosis in Eastern Africa	l	0	0	0	0	0	0	0	1	0	0	0	0	2015
961	4	2015-12-01	122	Preventative services offered by veterinarians on sheep farms inEngland and Wales: Opinions and drivers for proactive flock healthplanning	l	0	1	0	0	1	1	0	1	1	0	1	0	2015
962	4	2015-12-01	122	PrP genotype frequencies and risk evaluation for scrapie in dairysheep breeds from southern Italy	l	0	1	1	0	0	1	1	0	0	0	0	0	2015
963	4	2015-12-01	122	Quantification of antimicrobial usage in dairy cows and preweanedcalves in Argentina	l	0	1	0	0	1	1	0	1	0	0	0	0	2015
964	4	2015-12-01	122	Sample size considerations for livestock movement network data	l	0	0	0	0	0	0	0	0	0	0	0	0	2015
965	4	2015-12-01	122	Spatial and temporal analyses of metrics of tuberculosis infection inbadgers (Meles meles) from the Republic of Ireland: Trends inapparent prevalence	w	1	1	1	1	1	1	0	1	0	1	1	0	2015
966	4	2015-12-01	122	The causes and prognoses of different types of fractures in wild koalassubmitted to wildlife hospitals	w	0	1	1	1	0	1	0	1	1	1	1	0	2015
967	4	2015-12-01	122	The cost of clinical mastitis in the first 30 days of lactation: Aneconomic modeling tool	l	0	0	0	0	0	1	0	1	0	0	0	0	2015
968	4	2015-12-01	122	The economic impact of subclinical ketosis at the farm level: Tacklingthe challenge of over-estimation due to multiple interactions	l	0	0	0	0	0	0	0	0	0	0	1	0	2015
969	4	2015-12-01	122	The impact of infection with Schmallenberg virus on weaning rate inIrish sheep flocks	l	0	1	1	0	0	1	0	1	0	0	0	0	2015
970	4	2015-12-01	122	Using participatory epidemiology to investigate management optionsand relative importance of tick-borne diseases amongst transhumantzebu cattle in Karamoja Region, Uganda	l	1	1	1	0	0	0	0	1	0	0	0	0	2015
971	4	2016-12-01	135	Assessing the impact of tailored biosecurity advice on farmer behaviour and pathogen presence in beef herds in England and Wales	l	0	1	1	0	1	1	0	1	0	0	0	0	2016
972	4	2016-12-01	135	Assessing the sensitivity of European surveillance for detecting BSE incattle according to international standards	l	0	0	0	0	0	0	0	1	0	1	1	0	2016
973	4	2016-12-01	135	A tool to support the identification of suspect cases of exotic diseasesin cattle	l	0	0	0	0	0	0	0	0	0	0	0	0	2016
974	4	2016-12-01	135	Behaviour of European badgers and non-target species towardscandidate baits for oral delivery of a tuberculosis vaccine	w	0	1	0	0	1	1	0	1	0	0	0	0	2016
975	4	2016-12-01	135	Diagnostic accuracy of clinical illness for bovine respiratory disease(BRD) diagnosis in beef cattle placed in feedlots: A systematicliterature review and hierarchical Bayesian latent-class meta-analysis	l	0	0	0	0	0	1	0	1	0	0	0	0	2016
976	4	2016-12-01	135	Diagnostic evaluation of assays for detection of antibodies againstporcine epidemic diarrhea virus (PEDV) in pigs exposed to differentPEDV strains	l	0	1	1	0	0	0	0	0	0	0	0	0	2016
977	4	2016-12-01	135	Evaluating wildlife-cattle contact rates to improve the understandingof dynamics of bovine tuberculosis transmission in Michigan, USA	w	0	1	0	0	0	1	0	0	0	0	0	0	2016
978	4	2016-12-01	135	Investigating interactions between UK horse owners and prescribersof anthelmintics	h	0	1	1	0	0	1	0	1	0	0	0	0	2016
979	4	2016-12-01	135	Owned dog ecology and demography in Villa de Tezontepec, Hidalgo,Mexico	s	0	1	0	0	0	1	0	1	1	1	1	0	2016
980	4	2016-12-01	135	Qualitative analysis of the risks and practices associated with thespread of African swine fever within the smallholder pig value chainsin Uganda	l	0	0	0	0	0	1	0	0	0	0	0	0	2016
981	4	2016-12-01	135	Risk factors for Taenia saginata cysticercus infection in cattle in theUnited Kingdom: A farm-level case-control study and assessment ofthe role of movement history, age and sex	l	1	1	1	0	0	1	1	1	1	1	1	0	2016
982	4	2016-12-01	135	Sensitivity and specificity of PCR analysis and bacteriological cultureof milk samples for identification of intramammary infections in dairycows using latent class analysis	l	0	1	0	0	1	1	0	1	0	0	1	1	2016
983	4	2016-12-01	135	Susceptibility of Rhipicephalus (Boophilus) microplus to fluazuron(2.5 mg/kg) and a combination of novaluron(2.0 mg/kg) + eprinomectin (0.36 mg/kg) in field studies in Brazil	o	0	0	0	0	0	0	1	0	0	0	0	0	2016
984	4	2016-12-01	135	The Norberg angle is not an accurate predictor of canine hipconformation based on the distraction index and the dorsolateralsubluxation score	s	0	1	1	0	0	1	0	0	1	1	0	0	2016
985	4	2016-12-01	135	Urban dogs in rural areas: Human-mediated movement defines dogpopulations in southern Chile	s	0	1	0	0	0	0	0	0	0	1	0	0	2016

## Sheet: Pvalue_review
ID	Title	Month_Year	Volume	True_numb	Sig_p	NonSig_P	Section	A_P	Total_p
266	Risk factors for the herd-level bacteriologic prevalence of Salmonella in Belgian slaughter pigs	2004-08-01	65				abs
377	Comparison of bovine tuberculosis recurrence in Irish herds between 1998 and 2008	2013-09-01	111	A	1	0	abs	1	1
398	Identifying risk factors of avian infectious diseases at household level in Poyang Lake region, China	2014-09-01	116	A	2	1	abs	1	3
444	Risk factors associated with contagious caprine pleuro-pneumonia in goats in pastoral areas in the Rift Valley region of Kenya	2016-09-01	132	A	4	0	abs	1	4
844	Prevalence of VTEC O157 in dairy and veal herds and risk factors for veal herds	2008-11-01	87	N	1	0	abs	0	1
58	Prevalence of Salmonella spp. on Canadian pig farms using liquid or dry-feeding	2006-03-01	73	N	3	0	abs	0	3
227	Retrospective analysis of trends and production factors associated with sow mortality on swine-breeding farms in USA	2000-09-01	46	N	1	0	abs	0	1
534	Antibody-ELISA seroprevalence of bovine trypanosomosis in the Eastern Province of Zambia	2001-05-01	49	N	1	0	abs	0	1
608	Effects of neoprene mat on diarrhea, mortality and foreleg abrasion of pre-weaning piglets	2010-06-01	95	P	6	0	abs	1	6
703	Dietary oregano essential oil alleviates experimentally induced coccidiosis in broilers	2015-06-01	120	A	9	0	abs	1	9
832	A descriptive survey of lesions from cull sows harvested at two Midwestern U.S. facilities	2007-12-01	82	N	4	0	abs	0	4
858	Meta-analytical equivalence studies on diagnostic tests for bovine brucellosis allowing assessment of a test against a group of comparative tests	2009-12-01	92				abs
395	Prevalence and potential risk factors for the occurrence of cefotaxime resistant Escherichia coli in German fattening pig farms—A cross-sectional study	2014-09-01	116	A	3	0	abs	1	3
506	Management factors associated with Babesia bovis seroprevalence in cattle from eastern YucataÂn, Mexico	1999-06-01	40				abs
642	Case control study to investigate risk factors for bovine neonatal pancytopenia (BNP) in young calves in southern Germany	2012-06-01	105				abs
849	Trace micro-nutrients may affect susceptibility to bovine tuberculosis in cattle	2008-11-01	87	P	3	4	abs	1	7
981	Risk factors for Taenia saginata cysticercus infection in cattle in theUnited Kingdom: A farm-level case-control study and assessment ofthe role of movement history, age and sex	2016-12-01	135	A	1	0	abs	1	1
17	The incidence, calf morbidity and mortality due to Theileria parva infections in smallholder dairy farms in Murang'a District, Kenya	1999-03-01	39	N	1	0	abs	0	1
62	The role of spatial mixing in the spread of foot-and-mouth disease	2006-03-01	73				abs
129	Economic impacts of adoption and fundraising strategies in animal shelters	2014-03-01	113	N	2	0	abs	0	2
289	Effect of pathogen-specific clinical mastitis on herd life in two New York State dairy herds	2005-09-01	71	A	1	0	abs	1	1
343	Monitoring bluetongue disease (BTV-1) epidemic in southern Spain during 2007	2010-09-01	96	N	1	1	abs	0	2
387	Bovine tuberculosis in Northern Ireland: Risk factors associated with time from post-outbreak test to subsequent herd breakdown	2014-09-01	116	N	1	0	abs	0	1
405	Epidemiology and impact of Fasciola hepatica exposure in high-yielding dairy herds	2015-09-01	121	A	1	0	abs	1	1
412	Impact of particulate matter and ammonia on average daily weight gain, mortality and lung lesions in pigs	2015-09-01	121	A	11	0	abs	1	11
471	Validation of a model for ranking aquaculture facilities for risk-based disease surveillance	2017-09-01	145	P	1	1	abs	1	2
624	Absence reduction in entomological surveillance data to improve niche-based distribution models for Culicoides imicola	2011-06-01	100	N	1	0	abs	0	1
651	Investigation of mortality in Pacific oysters associated with Ostreid herpesvirus-1 Var in the Republic of Ireland in 2009	2012-06-01	105	N	2	0	abs	0	2
664	Newborn piglet traits associated with survival and growth performance until weaning	2013-06-01	110	N	4	1	abs	0	5
759	Using a tobit regression model to analyse risk factors for foot-pad dermatitis in commercially grown broilers	1998-12-01	37	P	6	0	abs	1	6
777	Herd-level risk factors associated with Leptospira spp. seroprevalence in dairy and beef cattle in Spain	2001-12-01	52	P	3	0	abs	1	3
811	Quantification of the spread of Mycoplasma hyopneumoniae in nursery pigs using transmission experiments	2004-12-01	66	A	0	1	abs	1	1
957	A trend analysis of antimicrobial resistance in commensalEscherichia coli from several livestock species in Belgium (2011–2014)	2015-12-01	122				abs
389	A quantitative risk assessment of bovine theileriosis entering Luapula Province from Central Province in Zambia via live cattle imports from traditional and commercial production sectors	2014-09-01	116				dis
728	Assessment of concurrent infection with bovine viral diarrhoea virus (BVDV) and Mycobacterium bovis: A herd-level risk factor analysis from Northern Ireland	2017-06-01	141	A			dis	1
942	Molecular epidemiology of Mycobacterium avium subsp.paratuberculosis isolated from sheep, cattle and deer on NewZealand pastoral farms	2014-12-01	117	A			dis	1
531	A multicenter, matched case-control study of risk factors for equine laminitis	2001-05-01	49	N			dis	0
277	Herd-level factors associated with isolation of Salmonella in a multi-state study of conventional and organic dairy farms: I. Salmonella shedding in cows	2005-09-01	70	N			dis	0
665	Assessment of confidence in freedom from Aujeszky’s disease and classical swine fever in Danish pigs based on serological sampling—Effect of reducing the number of samples	2013-06-01	110				dis
528	Host factors associated with the detection of Aeromonas Salmonicida and Yersinia ruckeri in Ontarion, Canada government fish hatcheries	2001-05-01	49				dis
271	Risk factors for stillbirth and foetal mummification in four Brazilian swine herds	2005-09-01	70	A			dis	1
158	Preliminary molecular epidemiological investigation of hepatitis E virus sequences from Québec, Canada	2015-03-01	118	N			dis	0
664	Newborn piglet traits associated with survival and growth performance until weaning	2013-06-01	110	P			dis	1
858	Meta-analytical equivalence studies on diagnostic tests for bovine brucellosis allowing assessment of a test against a group of comparative tests	2009-12-01	92				dis
301	Evaluation of underlying risk as a source of heterogeneity in meta-analyses: A simulation study of Bayesian and frequentist implementations of three models	2007-09-01	81				dis
79	Parameter estimation and simulations of a mathematical model of Corynebacterium pseudotuberculosis transmission in sheep	2008-03-01	83	A			dis	1
506	Management factors associated with Babesia bovis seroprevalence in cattle from eastern YucataÂn, Mexico	1999-06-01	40	A			dis	1
121	The interaction of host genetics and disease processes in chronic livestock disease: A simulation model of ovine footrot	2013-03-01	108	N			dis	0
965	Spatial and temporal analyses of metrics of tuberculosis infection inbadgers (Meles meles) from the Republic of Ireland: Trends inapparent prevalence	2015-12-01	122	A			dis	1
68	Animal-based national surveillance for zoonotic disease: Quality, limitations, and implications of a model system for monitoring rabies	2007-03-01	78	N			dis	0
624	Absence reduction in entomological surveillance data to improve niche-based distribution models for Culicoides imicola	2011-06-01	100	N			dis	0
293	Bayesian estimation of sensitivity and specificity of serum ELISA and faecal culture for diagnosis of paratuberculosis in Greek dairy sheep and goats	2006-09-01	76				dis
341	A case-control study of atypical scrapie in GB sheep flocks	2010-09-01	96				dis
551	Analysis of correlated discrete observations: background, examples and solutions	2003-06-01	59				dis
759	Using a tobit regression model to analyse risk factors for foot-pad dermatitis in commercially grown broilers	1998-12-01	37				dis
483	Application of composite estimation in studies of animal population production with two-stage repeated sample designs	1997-05-01	30				dis
978	Investigating interactions between UK horse owners and prescribersof anthelmintics	2016-12-01	135				dis
163	Cryptosporidium parvum infection and associated risk factors in dairy calves in western France	2015-03-01	118	A			dis	1
388	Bovine herpesvirus type 1 marker vaccine induces cross-protection against bubaline herpesvirus type 1 in water buffalo	2014-09-01	116	N			dis	0
860	Preferences of cost factors for mastitis management among Dutch dairy farmers using adaptive conjoint analysis	2009-12-01	92	N			dis	0
880	Assessing human–dog conflicts in Todos Santos, Guatemala: Bite incidences and public perception	2011-12-01	102	A			dis	1
847	Risk factors for time to diagnosis of feline upper respiratory tract disease in UK animal adoption shelters	2008-11-01	87	A			dis	1
334	A prospective study evaluating duration of swine breeding herd PRRS virus-free status and its relationship with measured risk	2010-09-01	96				dis
58	Prevalence of Salmonella spp. on Canadian pig farms using liquid or dry-feeding	2006-03-01	73	P			dis	1
379	Herd-level risk factors for Campylobacter fetus infection, Brucella seropositivity and within-herd seroprevalence of brucellosis in cattle in northern Nigeria	2013-09-01	111	A			dis	1
42	Animal- and herd-level risk factors for leptospiral seropositivity among sows in the Mekong delta, Vietnam	2002-03-01	53	A	4	0	res	1	4
53	The impact of badger removal on the control of tuberculosis in cattle herds in Ireland	2005-03-01	67	A	8	15	res	1	23
153	Assessment of l-lactatemia as a predictor of respiratory disease recognition and severity in feedlot steers	2015-03-01	118	P	3	3	res	1	6
182	Seroprevalence of Ehrlichia ruminantium antibodies and its associated risk factors in indigenous goats of South Africa	2016-03-01	125	P	4	0	res	1	4
200	Unraveling the contact patterns and network structure of pig shipments in the United States and its association with porcine reproductive and respiratory syndrome virus (PRRSV) outbreaks	2017-03-01	138	P	3	3	res	1	6
266	Risk factors for the herd-level bacteriologic prevalence of Salmonella in Belgian slaughter pigs	2004-08-01	65	A	3	1	res	1	4
268	Herd-level seroprevalence and risk-mapping of bovine hypodermosis in Belgian cattle herds	2004-08-01	65	A	4	2	res	1	6
334	A prospective study evaluating duration of swine breeding herd PRRS virus-free status and its relationship with measured risk	2010-09-01	96	A	5	4	res	1	9
392	Risk factors associated with leg disorders of gestating sows in different group-housing systems: A cross-sectional study in 108 farrow-to-finish farms in France	2014-09-01	116	P	2	1	res	1	3
409	Prevalence and concentration of Escherichia coli O157 in different seasons and cattle types processed in North America: A systematic review and meta-analysis of published research	2015-09-01	121	P	8	24	res	1	32
422	Use of Bayesian Belief Network techniques to explore the interaction of biosecurity practices on the probability of porcine disease occurrence in Canada	2016-09-01	131				res
446	Investigation of risk factors for mortality in aged guide dogs: A retrospective cohort study	2016-09-01	132	P	4	1	res	1	5
480	Predicting farm-level animal populations using environmental and socioeconomic variables	2017-09-01	145	A	1	0	res	1	1
512	Associations of Neospora caninum seropositivity with gestation number and pregnancy outcome in Danish dairy herds	1999-06-01	40	A	3	2	res	1	5
526	Factors associated with intersucking in Swiss dairy heifers	2000-06-01	45				res
530	Cross-sectional study of the seroprevalence to Borrelia burgdorferi sensu lato and granulocytic Ehrlichia spp. and demographic, clinical and tick-exposure factors in Swedish horses	2001-05-01	49	A	1	3	res	1	4
531	A multicenter, matched case-control study of risk factors for equine laminitis	2001-05-01	49	P	6	1	res	1	7
536	Risk factors for repeat-breeder syndrome in New South Wales dairy cows	2002-06-01	54				res
571	Risk factors for Campylobacter spp. colonization in broiler flocks in Iceland	2006-06-01	74	P	3	0	res	1	3
580	Prevalence of serum antibodies to bovine herpesvirus-1 and bovine viral diarrhea virus in beef cattle in Uruguay	2008-06-01	85	A	10	4	res	1	14
603	Risk factors of bovine tuberculosis in cattle in rural livestock production systems of Ethiopia	2009-06-01	89	A	1	1	res	1	2
605	A survey of bovine cysticercosis/human taeniosis in Northern Turkana District, Kenya	2009-06-01	89	A	1	2	res	1	3
642	Case control study to investigate risk factors for bovine neonatal pancytopenia (BNP) in young calves in southern Germany	2012-06-01	105	A	1	0	res	1	1
661	Factors related to the level of occurrence of bovine abortion in Chilean dairy herds	2013-06-01	110	N	3	0	res	0	3
683	Molecular detection of canine parvovirus in flies (Diptera) at open and closed canine facilities in the eastern United States	2014-06-01	114	A	11	9	res	1	20
722	Towards better-informed consent: Research with livestock-keepers and informal traders in East Africa	2016-06-01	128	P	7	2	res	1	9
728	Assessment of concurrent infection with bovine viral diarrhoea virus (BVDV) and Mycobacterium bovis: A herd-level risk factor analysis from Northern Ireland	2017-06-01	141	P	44	14	res	1	58
731	Association between risk of seroconversion of sentinel cattle to bluetongue viruses and CuZicoides species (Diptera: Ceratopogonidae) in Queensland, Australia	1997-10-01	32	A	1	1	res	1	2
763	Quantification of the transmission of classical swine fever virus between herds during the 1997±1998 epidemic in The Netherlands	1999-12-01	42	A	7	1	res	1	8
770	Models for the dispersal in Australia of the arbovirus vector, Culicoides brevitarsis Kieffer (Diptera: Ceratopogonidae)	2000-12-01	47	N	1	0	res	0	1
788	Seasonality of canine leptospirosis in the United States and Canada and its association with rainfall	2002-12-01	56	P	7	0	res	1	7
823	An epidemiologic study of late-term abortions in dairy cattle in Denmark, July 2000–August 2003	2006-12-01	77	P	8	14	res	1	22
827	Quantification of the contact structure in a feral cattle population and its hypothetical effect on the transmission of bovine herpesvirus 1	2006-12-01	77	P	1	1	res	1	2
838	Validation of computerized Swedish horse insurance data against veterinary clinical records	2007-12-01	82	A	4	2	res	1	6
844	Prevalence of VTEC O157 in dairy and veal herds and risk factors for veal herds	2008-11-01	87	P	6	1	res	1	7
882	Epidemiological aspects and financial impact of lumpy skin disease in Ethiopia	2011-12-01	102	N	3	0	res	0	3
883	Farm-level reproduction number during an epidemic of infectious salmon anemia virus in southern Chile in 2007–2009	2011-12-01	102	P	4	9	res	1	13
891	Shorter-term risk of Mycobacterium bovis in Irish cattle following an inconclusive diagnosis to the single intradermal comparative tuberculin test	2011-12-01	102	A	3	5	res	1	8
910	A national-scale picture of U.S. cattle movements obtainedfrom Interstate Certificate of Veterinary Inspection data	2013-11-01	112	N	1	0	res	0	1
942	Molecular epidemiology of Mycobacterium avium subsp.paratuberculosis isolated from sheep, cattle and deer on NewZealand pastoral farms	2014-12-01	117	A	3	0	res	1	3
945	Survival analysis of clinical mastitis data using a nestedfrailty Cox model fit as a mixed-effects Poisson model	2014-12-01	117	A	6	2	res	1	8
947	A comparison of West Nile virus surveillance using survival analysesof dead corvid and mosquito pool data in Ontario, 2002–2008	2015-12-01	122	A	6	0	res	1	6
956	Dogslife: A cohort study of Labrador Retrievers in the UK	2015-12-01	122	A	9	0	res	1	9
406	Herd-level prevalence and associated risk factors for Mycobacterium avium subsp. paratuberculosis in cattle in the State of Paraíba, Northeastern Brazil	2015-09-01	121				res
521	Prevalence and distribution of gastro-intestinal helminths and haemoparasites in young scavenging chickens in upper eastern region of Ghana, West Africa	2000-06-01	45	A	1	0	res	1	1
700	Prediction of respiratory disease and diarrhea in veal calves based on immunoglobulin levels and the serostatus for respiratory pathogens measured atarrival	2015-06-01	120	P	7	7	res	1	14
705	A current lifetable and causes of death for insured dogs in Japan	2015-06-01	120	N	1	0	res	0	1
938	Estimating the population attributable fraction forschizophrenia when Toxoplasma gondii is assumed absent inhuman populations	2014-12-01	117				res
40	Risk factors for Aujeszky's disease in pig herds and detection of field virus antibodies in fattening pugs in the state of Yucatan, Mexico	2002-03-01	53	N	1	1	res	0	2
106	A meta-analysis comparing the effect of PCV2 vaccines on average daily weight gain and mortality rate in pigs from weaning to slaughter	2011-03-01	98	N	0	1	res	0	1
119	Estimation of the reproduction ratio (R0) of bluetongue based on serological field data and comparison with other BTV transmission models	2013-03-01	108	A	1	2	res	1	3
130	Evidence for widespread Leishmania infantum infection among wild carnivores in L. infantum periendemic northern Spain	2014-03-01	113	P	4	3	res	1	7
158	Preliminary molecular epidemiological investigation of hepatitis E virus sequences from Québec, Canada	2015-03-01	118				res
206	Non-inferiority of nitric oxide releasing intranasal spray compared to sub-therapeutic antibiotics to reduce incidence of undifferentiated fever and bovine respiratory disease complex in low to moderate risk beef cattle arriving at a commercial feedlot	2017-03-01	138	A	2	8	res	1	10
209	Sensitivities and specificities of two ELISA tests for detecting infection with Sarcocystis in cattle of Western Australia	1997-09-01	32	A	1	0	res	1	1
223	Influence of Trypanosoma evansi infection on milk yield of dairy cattle in northeast Thailand	1999-09-01	42	A	1	0	res	1	1
239	An epidemiological analysis of a canine-biopsies database compiled by a diagnostic histopathology service	2001-09-01	51				res
254	Risk factors for fecal shedding of Salmonella from horses in a veterinary teaching hospital	2003-09-01	60	P	1	8	res	1	9
260	Application of phylogeny reconstruction and character-evolution analysis to inferring patterns of directional microbial transmission	2003-09-01	61	P	4	1	res	1	5
277	Herd-level factors associated with isolation of Salmonella in a multi-state study of conventional and organic dairy farms: I. Salmonella shedding in cows	2005-09-01	70	N	0	1	res	0	1
308	Factors influencing the prevalence of Salmonella spp. in swine farms: A meta-analysis approach	2007-09-01	81				res
324	Combined application of social network and cluster detection analyses for temporal-spatial characterization of animal movements in Salamanca, Spain	2009-09-01	91	N	3	0	res	0	3
363	Horse owners'/managers' perceptions about effectiveness of biosecurity measures based on their experiences during the 2007 equine influenza outbreak in Australia	2012-09-01	106				res
367	Estimating spatial and temporal variations of the reproduction number for highly pathogenic avian influenza H5N1 epidemic in Thailand	2012-09-01	106	A	2	1	res	1	3
379	Herd-level risk factors for Campylobacter fetus infection, Brucella seropositivity and within-herd seroprevalence of brucellosis in cattle in northern Nigeria	2013-09-01	111	A	2	1	res	1	3
388	Bovine herpesvirus type 1 marker vaccine induces cross-protection against bubaline herpesvirus type 1 in water buffalo	2014-09-01	116	N	3	0	res	0	3
393	Comparison of time to PRRSv-stability and production losses between two exposure programs to control PRRSv in sow herds	2014-09-01	116	A	18	7	res	1	25
412	Impact of particulate matter and ammonia on average daily weight gain, mortality and lung lesions in pigs	2015-09-01	121	P	9	0	res	1	9
441	Correlations between peripheral parasite load and common clinical and laboratory alterations in dogs with visceral leishmaniasis	2016-09-01	132	N	1	0	res	0	1
450	Benchmarking of pluck lesions at slaughter as a health monitoring tool for pigs slaughtered at 170 kg (heavy pigs)	2017-09-01	144	A	6	0	res	1	6
468	Exploring the role of small-scale livestock keepers for national biosecurity—The pig case	2017-09-01	145	A	6	1	res	1	7
476	Sampling pig farms at the abattoir in a cross-sectional study − Evaluation of a sampling method	2017-09-01	145	A	1	0	res	1	1
492	Ivermectin treatment did not increase slaughter weight of first-year reindeer calves	1998-06-01	35	A	0	5	res	1	5
501	Seroprevalence of Toxoplasma gondii infection in sheep and alpacas (Llama pacos) in Chile	1999-06-01	40	A	1	1	res	1	2
510	Effects of disease on milk production in the dairy cow: a review	1999-06-01	41				res
513	Factors associated with being a bovine-virus diarrhoea (BVD) seropositive dairy herd in the Mùre and Romsdal County of Norway	1999-06-01	40	P	2	0	res	1	2
514	Perceptions of veterinarians regarding privatization of veterinary services delivery in Ghana and Jamaica	1999-06-01	40	A	1	4	res	1	5
554	Risk factors for Campylobacter spp. infection in Senegalese broiler-chicken flocks	2004-06-01	64	N	1	0	res	0	1
558	Seroprevalence of and risk factors for Bartonella henselae and Bartonella quintana infections among pet cats in Jordan	2004-06-01	64	N	1	0	res	0	1
598	Heifer rearing conditions affect length of productive life in Swedish dairy cows	2009-06-01	89	P	1	1	res	1	2
628	A case-control study of risk factors for equine influenza spread onto horse premises during the 2007 epidemic in Australia	2011-06-01	100	A	3	1	res	1	4
651	Investigation of mortality in Pacific oysters associated with Ostreid herpesvirus-1 Var in the Republic of Ireland in 2009	2012-06-01	105	P	5	1	res	1	6
672	Simulation modelling of a hypothetical introduction of foot-and-mouth disease into Alberta	2014-06-01	114	A	5	3	res	1	8
678	A cohort study on Actinobacillus pleuropneumoniae colonisation in suckling piglets	2014-06-01	114	P	8	2	res	1	10
712	Network, cluster and risk factor analyses for porcine reproductive and respiratory syndrome using data from swine sites participating in a disease control program	2016-06-01	128	A	2	0	res	1	2
726	Molecular and serological detection of Trypanosoma cruzi in dogs (Canis lupus familiaris) suggests potential transmission risk in areas of recent acute Chagas disease outbreaks in Colombia	2017-06-01	141	N	1	0	res	0	1
729	A comparison of different models for assessing variations in the sero-prevalence of infectious bovine rhinotracheitis by farm, area and district in Kenya	1997-10-01	32	P	4	2	res	1	6
733	Effect of husbandry methods on seropositivity to African swine fever virus in Sardinian swine herds	1997-10-01	32	N	2	2	res	0	4
742	A Cox proportional-hazards model with time-dependent covariates to evaluate the relationship between body-condition score and the risks of first insemination and pregnancy in a high-producing dairy herd	1998-12-01	37	A	0	2	res	1	2
754	Risk factors for brucellosis seropositivity of goat herds in the Mexicali Valley of Baja California, Mexico	1998-12-01	37	P	5	1	res	1	6
759	Using a tobit regression model to analyse risk factors for foot-pad dermatitis in commercially grown broilers	1998-12-01	37	P	3	0	res	1	3
777	Herd-level risk factors associated with Leptospira spp. seroprevalence in dairy and beef cattle in Spain	2001-12-01	52	P	6	1	res	1	7
780	The effect of eprinomectin treatment at calving on reproduction parameters in adult dairy cows in Canada	2002-12-01	56	P	2	3	res	1	5
817	Factor analysis of a Johne’s disease risk assessment questionnaire with evaluation of factor scores and a subset of original questions as predictors of observed clinical paratuberculosis	2005-12-01	72	A	3	5	res	1	8
832	A descriptive survey of lesions from cull sows harvested at two Midwestern U.S. facilities	2007-12-01	82	P	14	1	res	1	15
842	Individual animal risk factors for clinical mastitis in meat sheep in Norway	2008-11-01	87	P	3	4	res	1	7
845	Rearing conditions, morbidity and breeding performance in dairy heifers in southwest Sweden	2008-11-01	87	P	8	1	res	1	9
851	A flock-tailored early warning system for low pathogenic avian influenza (LPAI) in commercial egg laying flocks	2009-12-01	92	A	0	1	res	1	1
852	Dog obesity: Owner attitudes and behaviour	2009-12-01	92	P	5	3	res	1	8
884	Horse owners’ biosecurity practices following the first equine influenza outbreak in Australia	2011-12-01	102				res
889	Relationship between somatic cell count status and subsequent clinical mastitis in Dutch dairy cows	2011-12-01	102	N	1	0	res	0	1
893	The importance of location in contact networks: Describing early epidemic spread using spatial social network analysis	2011-12-01	102	P	1	2	res	1	3
913	Days-lost to training and competition in relation to workloadin 263 elite show-jumping horses in four European countries	2013-11-01	112	A	2	0	res	1	2
935	Distribution of cow-calf producers’ beliefs regardinggathering and holding their cattle and observing animalmovement restrictions during an outbreak offoot-and-mouth disease	2014-12-01	117	N	18	1	res	0	19
982	Sensitivity and specificity of PCR analysis and bacteriological cultureof milk samples for identification of intramammary infections in dairycows using latent class analysis	2016-12-01	135	N	1	0	res	0	1
67	Serodiagnosis of equine infectious anemia by agar gel immunodiffusion and ELISA using a recombinant p26 viral protein expressed in Escgerichia coli as antigen	2007-03-01	78				res
111	Bovine respiratory disease: Efficacy of different prophylactic treatments in veal calves and antimicrobial resistance of isolated Pasteurellaceae	2012-03-01	103	A	6	4	res	1	10
129	Economic impacts of adoption and fundraising strategies in animal shelters	2014-03-01	113	N	0	1	res	0	1
214	Quantitative assessment of genomic similarity from restriction fragment patterns	1997-09-01	32	A	1	0	res	1	1
293	Bayesian estimation of sensitivity and specificity of serum ELISA and faecal culture for diagnosis of paratuberculosis in Greek dairy sheep and goats	2006-09-01	76				res
378	Associations of herd- and cow-level factors, cow lying behavior, and risk of elevated somatic cell count in free-stall housed lactating dairy cows	2013-09-01	111	N	0	2	res	0	2
494	Risk factors for the presence of antibodies to Toxoplasma gondii in Norwegian slaughter lambs	1998-06-01	35				res
749	Interactions between the associations of parity, lactation length, and weaning-to-conception interval with subsequent litter size in swine herds using early weaning	1998-12-01	37	P	6	3	res	1	9
85	Salmonella in Belgian laying hens: An identification of risk factors	2008-03-01	83	A	17	63	tab	1	80
191	Application of discrete choice experiment to assess farmers’ willingness to report swine diseases in the Red River Delta region, Vietnam	2017-03-01	138	N			tab	0
196	Epidemiological evaluation of cats rescued at a secondary emergency animal shelter in Miharu, Fukushima, after the Great East Japan Earthquakes	2017-03-01	138	A	12	6	tab	1	18
413	Number of pigs born alive in parity 1 sows associated with lifetime performance and removal hazard in high- or low-performing herds in Japan	2015-09-01	121	P	16	2	tab	1	18
526	Factors associated with intersucking in Swiss dairy heifers	2000-06-01	45	N			tab	0
547	Social-network analysis of Mycobacterium bovis transmission among captive brushtail possums (Trichosurus vulpecula)	2003-06-01	59	N	14	0	tab	0	14
566	An exploratory study on risk factors for postweaning multisystemic wasting syndrome (PMWS) in Spain	2005-06-01	69	A	7	0	tab	1	7
614	Development and validation of a bilingual questionnaire for measuring udder health related management practices on dairy farms	2010-06-01	95	N			tab	0
625	Culling decisions of dairy farmers during a 3-year Salmonella control study	2011-06-01	100	A	15	2	tab	1	17
626	Prevalence of subclinical ketosis in dairy cattle in the Southwestern Iran and detection of cutoff point for NEFA and glucose concentrations for diagnosis of subclinical ketosis	2011-06-01	100	A	1	1	tab	1	2
644	The epidemiology of bovine spongiform encephalopathy in the Republic of Ireland before and after the reinforced feed ban	2012-06-01	105	A	11	11	tab	1	22
728	Assessment of concurrent infection with bovine viral diarrhoea virus (BVDV) and Mycobacterium bovis: A herd-level risk factor analysis from Northern Ireland	2017-06-01	141	A	20	6	tab	1	26
808	Factors associated with the presence of Escherichia coli O157 in feedlot–cattle water and feed in the Midwestern USA	2004-12-01	66	P	10	1	tab	1	11
889	Relationship between somatic cell count status and subsequent clinical mastitis in Dutch dairy cows	2011-12-01	102				tab
926	Riders’ prediction of results at Fédération EquestreInternationale (FEI) endurance rides and sources of bias inquestionnaires completed by riders	2013-11-01	112	A	32	11	tab	1	43
940	Evaluation of a behavioral assessment tool for dogsrelinquished to shelters	2014-12-01	117	P	24	45	tab	1	69
82	Self-clearance from BVDV infections—A frequent finding in dairy herds in an endemically infected region in Peru	2008-03-01	83	A	1	6	tab	1	7
90	Targeted badger removal and the subsequent risk of bovine tuberculosis in cattle herds in county Laois, Ireland	2009-03-01	88	A	17	3	tab	1	20
98	Perceptions, circumstances and motivators that influence implementation of zoonotic control programs on cattle farms	2010-03-01	93	A	3	0	tab	1	3
138	Effect of carryover and presampling procedures on the results of real-time PCR used for diagnosis of bovine intramammary infections with Streptococcus agalactiae at routine milk recordings	2014-03-01	113	P	16	9	tab	1	25
153	Assessment of l-lactatemia as a predictor of respiratory disease recognition and severity in feedlot steers	2015-03-01	118	P	14	7	tab	1	21
187	Evidence and potential risk factors of tuberculosis among captive Asian elephants and wildlife staff in Peninsular Malaysia	2016-03-01	125	A	7	17	tab	1	24
205	Epidemiological investigation of bovine tuberculosis outbreaks in Uruguay (2011–2013)	2017-03-01	138	A	18	4	tab	1	22
254	Risk factors for fecal shedding of Salmonella from horses in a veterinary teaching hospital	2003-09-01	60	P	1	5	tab	1	6
267	Comparison of management practices between Ohio, USA dairy farms participating in whole-herd Johne’s disease testing programs and those not participating	2004-08-01	65	A	18	25	tab	1	43
281	Risk factors for digital dermatitis in dairy cows kept in cubicle houses in The Netherlands	2005-09-01	71	A	18	24	tab	1	42
355	When cats' ways of life interact with their viruses: A study in 15 natural populations of owned and unowned cats (Felis silvestris catus)	2011-09-01	101	A	15	14	tab	1	29
379	Herd-level risk factors for Campylobacter fetus infection, Brucella seropositivity and within-herd seroprevalence of brucellosis in cattle in northern Nigeria	2013-09-01	111	A	59	20	tab	1	79
394	Risk factors associated with persistence of Salmonella shedding in finishing pigs	2014-09-01	116	A	13	1	tab	1	14
408	Investigation of the association between the test day milk fat–protein ratio and clinical mastitis using a Poisson regression approach for analysis of time-to-event data	2015-09-01	121	A	21	8	tab	1	29
438	A retrospective epidemiological analysis of risk factors for a primary necropsy diagnosis of bovine respiratory disease	2016-09-01	132	A	26	19	tab	1	45
522	Estimates of within-herd incidence rates of Mycobacterium bovis in Canadian cattle and cervids between 1985 and 1994	2000-06-01	45	P	3	1	tab	1	4
535	Risk factors for clinical salmonellosis in Virginia, USA cattle herds	2001-05-01	49	A	5	58	tab	1	63
554	Risk factors for Campylobacter spp. infection in Senegalese broiler-chicken flocks	2004-06-01	64				tab
557	Prevalence estimation and risk factors for Escherichia coli O157 on Dutch dairy farms	2004-06-01	64	P	2	3	tab	1	5
586	Herd and cow-level prevalence of sole ulcers in The Netherlands and associated-risk factors	2008-06-01	85	P	15	3	tab	1	18
594	Association of growth, feeding practices and exercise conditions with the prevalence of Developmental Orthopaedic Disease in limbs of French foals at weaning	2009-06-01	89	A	10	4	tab	1	14
604	A nation-wide epidemiological study of acute bovine respiratory disease in France	2009-06-01	89	A	6	0	tab	1	6
700	Prediction of respiratory disease and diarrhea in veal calves based on immunoglobulin levels and the serostatus for respiratory pathogens measured atarrival	2015-06-01	120	P	8	5	tab	1	13
703	Dietary oregano essential oil alleviates experimentally induced coccidiosis in broilers	2015-06-01	120	A	13	23	tab	1	36
715	Use of a multiple choice questionnaire to assess UK prescribing channels’ knowledge of helminthology and best practice surroundinganthelmintic use in livestock and horses	2016-06-01	128	A	10	16	tab	1	26
766	The 1997-1998 classical swine fever epidemic in The Netherlands Ð a survival analysis	1999-12-01	42	A	4	1	tab	1	5
792	Brucellosis and Q-fever seroprevalences of nomadic pastoralists and their livestock in Chad	2003-12-01	61	A	1	2	tab	1	3
815	Bovine viral diarrhoea virus in beef cattle herds of Yucatan, Mexico: Seroprevalence and risk factors	2005-12-01	72	A	6	8	tab	1	14
816	Cow-level evaluation of a kinetics ELISA with multiple cutoff values to detect fecal shedding of Mycobacterium avium subspecies paratuberculosis in New York State dairy cows	2005-12-01	72	A	5	2	tab	1	7
818	Risk factors for outbreaks of infectious salmon anemia in farmed Atlantic salmon, Salmo salar	2005-12-01	72	A	42	17	tab	1	59
819	The effective life of ivermectin on Western Australian sheep farms—A survival analysis	2005-12-01	72	A	3	1	tab	1	4
822	A cross-sectional survey of Australian chicken farms to identify risk factors associated with seropositivity to Newcastle-disease virus	2006-12-01	77	P	19	29	tab	1	48
871	Field trial of a synthetic tsetse-repellent technology developed for the control of bovine trypanosomosis in Kenya	2010-12-01	97	A	6	14	tab	1	20
875	Prevalence and risk factors for Salmonella spp. contamination in French broiler-chicken flocks at the end of the rearing period	2010-12-01	97	A	4	10	tab	1	14
891	Shorter-term risk of Mycobacterium bovis in Irish cattle following an inconclusive diagnosis to the single intradermal comparative tuberculin test	2011-12-01	102	A	46	52	tab	1	98
923	Perceptions of veterinarians in bovine practice and producerswith beef cow-calf operations enrolled in the US VoluntaryBovine Johne’s Disease Control Program concerningeconomic losses associated with Johne’s disease	2013-11-01	112	A	18	84	tab	1	102
933	Cost assessment of the movement restriction policy in Franceduring the 2006 bluetongue virus episode (BTV-8)	2014-12-01	117	A	14	7	tab	1	21
966	The causes and prognoses of different types of fractures in wild koalassubmitted to wildlife hospitals	2015-12-01	122	A	4	2	tab	1	6
93	Equine West Nile virus disease occurrence and the Normalized Difference Vegetation Index	2009-03-01	88				tab
186	Area contact networks and the spatio-temporal spread of infectious salmon anemia virus (ISAV) in Chile	2016-03-01	125	P	30	4	tab	1	34
427	Effect of feeding sodium butyrate in the late finishing period on Salmonella carriage, seroprevalence, and growth of finishing pigs	2016-09-01	131	A	2	21	tab	1	23
456	Spatial dynamics of porcine epidemic diarrhea (PED) spread in the southern Kyushu, Japan	2017-09-01	144	N			tab	0
460	Impact of FMD outbreak on milk production and heifers’ growth on a dairy herd in southern Iran	2017-09-01	144	A	16	8	tab	1	24
461	Epidemiological features and financial loss due to clinically diagnosed Haemorrhagic Septicemia in bovines in Karnataka, India	2017-09-01	144	P	1	2	tab	1	3
482	The prevalence of serum antibodies to tick-borne infections in cattle in smallholder dairy farms in Murang’a District, Kenya; a cross-sectional study	1997-05-01	30	A	15	2	tab	1	17
608	Effects of neoprene mat on diarrhea, mortality and foreleg abrasion of pre-weaning piglets	2010-06-01	95	N			tab	0
633	Identifying equine premises at high risk of introduction of vector-borne diseases using geo-statistical and space-time analyses	2011-06-01	100	N			tab	0
672	Simulation modelling of a hypothetical introduction of foot-and-mouth disease into Alberta	2014-06-01	114	A	57	7	tab	1	64
729	A comparison of different models for assessing variations in the sero-prevalence of infectious bovine rhinotracheitis by farm, area and district in Kenya	1997-10-01	32	A	14	0	tab	1	14
879	An evaluation of Foot-and-Mouth Disease outbreak reporting in mainland South-East Asia from 2000 to 2010	2011-12-01	102				tab
883	Farm-level reproduction number during an epidemic of infectious salmon anemia virus in southern Chile in 2007–2009	2011-12-01	102				tab
931	Abattoir based survey of Salmonella in finishing pigs in theUnited Kingdom 2006–2007	2014-12-01	117	P	17	33	tab	1	50
1	Nation-wide Salmonella enterica surveillance and control in Danish slaughter swine herds	1997-02-01	29				tab
28	Community-based active surveillance for rabies in Machakos District, Kenya	2000-03-01	44	P	4	3	tab	1	7
31	Mortality in sahelian goats in Nigeria	2000-03-01	44	N			tab	0
111	Bovine respiratory disease: Efficacy of different prophylactic treatments in veal calves and antimicrobial resistance of isolated Pasteurellaceae	2012-03-01	103				tab
180	Prevalence and risk factors for foot and mouth disease infection in small ruminants in Israel	2016-03-01	125	A	9	7	tab	1	16
285	Spatial relationship between Mycobacterium bovis strains in cattle and badgers in four areas in Ireland	2005-09-01	71	A	22	2	tab	1	24
319	Quantitative epidemiology: Progress and challenges	2008-09-01	86	A	1	1	tab	1	2
491	An epidemiological study of calcium metabolism in non-paretic postparturient Holstein cows	1998-06-01	35	A	21	0	tab	1	21
514	Perceptions of veterinarians regarding privatization of veterinary services delivery in Ghana and Jamaica	1999-06-01	40	A	14	44	tab	1	58
521	Prevalence and distribution of gastro-intestinal helminths and haemoparasites in young scavenging chickens in upper eastern region of Ghana, West Africa	2000-06-01	45	A	0	28	tab	1	28
533	A field trial of the effect of improved piglet management on smallholder sow productivity in the Philippines	2001-05-01	49	A	7	5	tab	1	12
545	Maedi-visna impact on productivity in Quebec sheep flocks (Canada)	2003-06-01	59	P	20	12	tab	1	32
621	Spatial and temporal clustering of calcium oxalate and magnesium ammonium phosphate uroliths in dogs living in Ontario, Canada between 1998 and 2006	2010-06-01	95	A	4	0	tab	1	4
687	A generic weather-driven model to predict mosquito population dynamics applied to species of Anopheles, Culexand Aedes genera of southern France	2015-06-01	120	P	7	7	tab	1	14
832	A descriptive survey of lesions from cull sows harvested at two Midwestern U.S. facilities	2007-12-01	82	A	53	77	tab	1	130
887	Perceived risk and strategy efficacy as motivators of risk management strategy adoption to prevent animal diseases in pig farming	2011-12-01	102	N			tab	0
934	Distribution of cow–calf producers’ beliefs about reportingcattle with clinical signs of foot-and-mouth disease to aveterinarian before or during a hypothetical outbreak	2014-12-01	117	A	9	17	tab	1	26
952	Comparison of mixed effects models of antimicrobial resistancemetrics of livestock and poultry Salmonella isolates from a nationalmonitoring system	2015-12-01	122	N			tab	0
984	The Norberg angle is not an accurate predictor of canine hipconformation based on the distraction index and the dorsolateralsubluxation score	2016-12-01	135				tab

## Sheet: CI_review
ID	Title	Month_Year	Volume	As_sig	Epi_measure	Section
652	Cost of post-weaning multi-systemic wasting syndrome and porcine circovirus type-2 subclinical infection in England – An economic disease model	2013-06-01	110	E	N	abs
54	Tuberculosis and brucellosis prevalence survey on dairy cattle in Mbarara milk basin (Uganda)	2005-03-01	67	E	A	abs
506	Management factors associated with Babesia bovis seroprevalence in cattle from eastern YucataÂn, Mexico	1999-06-01	40	I	A	abs
246	Repeatability and prediction from a telephone questionnaire measuring diet and activity level in cats	2002-09-01	55			abs
906	Validation of Nordic dairy cattle disease recording databases—Completeness for locomotor disorders	2012-12-01	107			abs
252	Prevalence estimates for paratuberculosis adjusted for test variability using Bayesian analysis	2003-09-01	60			abs
395	Prevalence and potential risk factors for the occurrence of cefotaxime resistant Escherichia coli in German fattening pig farms—A cross-sectional study	2014-09-01	116	I	N	abs
128	Mining free-text medical records for companion animal enteric syndrome surveillance	2014-03-01	113	E	A	abs
219	Evaluation of an indirect ELISA for the diagnosis of bovine brucellosis in milk and serum samples in dairy cattle in Argentina	1998-09-01	36	E	A	abs
697	Evaluation of a hierarchical ascendant clustering process implemented in a veterinary syndromic surveillance system	2015-06-01	120	E	A	abs
924	Prognostic factors of early metastasis and mortality in dogswith appendicular osteosarcoma after receiving surgery:An individual patient data meta-analysis	2013-11-01	112	I	A	abs
531	A multicenter, matched case-control study of risk factors for equine laminitis	2001-05-01	49	P	A	abs
601	Farm-level factors associated with above-average production on pig farms in Evia, Greece	2009-06-01	89	P	A	abs
723	Canine leptospirosis in Switzerland—A prospective cross-sectional study examining seroprevalence, risk factors and urinary shedding of pathogenic leptospires	2017-06-01	141	P	A	abs
844	Prevalence of VTEC O157 in dairy and veal herds and risk factors for veal herds	2008-11-01	87	A	A	abs
958	Foot abscess in sheep: Evaluation of risk factors and managementoptions	2015-12-01	122	I	A	abs
266	Risk factors for the herd-level bacteriologic prevalence of Salmonella in Belgian slaughter pigs	2004-08-01	65	E	A	abs
351	Factors associated with mortality of geriatric horses in the United Kingdom	2011-09-01	101	E	A	abs
377	Comparison of bovine tuberculosis recurrence in Irish herds between 1998 and 2008	2013-09-01	111	A	A	abs
444	Risk factors associated with contagious caprine pleuro-pneumonia in goats in pastoral areas in the Rift Valley region of Kenya	2016-09-01	132	I	A	abs
849	Trace micro-nutrients may affect susceptibility to bovine tuberculosis in cattle	2008-11-01	87	I	A	abs
979	Owned dog ecology and demography in Villa de Tezontepec, Hidalgo,Mexico	2016-12-01	135	E	A	abs
101	Susceptibility to paratuberculosis infection in cattle is associated with single nucleotide polymorphisms in Toll-like receptor 2 which modulate immune responses against Mycobacterium avium subspecies paratuberculosis	2010-03-01	93	I	A	abs
283	Risk factors for hazard of release from Salmonella-control restriction on Swedish cattle farms from 1993 to 2002	2005-09-01	71	I	A	abs
398	Identifying risk factors of avian infectious diseases at household level in Poyang Lake region, China	2014-09-01	116	I	A	abs
642	Case control study to investigate risk factors for bovine neonatal pancytopenia (BNP) in young calves in southern Germany	2012-06-01	105	I	A	abs
835	Seroprevalence of and risk factors for brucellosis of goats in herds of Michoacan, Mexico	2007-12-01	82	E	A	abs
981	Risk factors for Taenia saginata cysticercus infection in cattle in theUnited Kingdom: A farm-level case-control study and assessment ofthe role of movement history, age and sex	2016-12-01	135	I	A	abs
718	Bayesian estimation of prevalence of paratuberculosis in dairy herds enrolled in a voluntary Johne’s Disease Control Programme in Ireland	2016-06-01	128			res
728	Assessment of concurrent infection with bovine viral diarrhoea virus (BVDV) and Mycobacterium bovis: A herd-level risk factor analysis from Northern Ireland	2017-06-01	141	I	P	res
155	From network analysis to risk analysis—An approach to risk-based surveillance for bovine tuberculosis in Minnesota, US	2015-03-01	118	I	N	res
29	Risk factors for epidemic respiratory disease in Norwegian cattle herds	2000-03-01	44	E	A	res
683	Molecular detection of canine parvovirus in flies (Diptera) at open and closed canine facilities in the eastern United States	2014-06-01	114	I	P	res
731	Association between risk of seroconversion of sentinel cattle to bluetongue viruses and CuZicoides species (Diptera: Ceratopogonidae) in Queensland, Australia	1997-10-01	32	E	N	res
521	Prevalence and distribution of gastro-intestinal helminths and haemoparasites in young scavenging chickens in upper eastern region of Ghana, West Africa	2000-06-01	45	E	A	res
700	Prediction of respiratory disease and diarrhea in veal calves based on immunoglobulin levels and the serostatus for respiratory pathogens measured atarrival	2015-06-01	120	I	N	res
956	Dogslife: A cohort study of Labrador Retrievers in the UK	2015-12-01	122	E	A	res
605	A survey of bovine cysticercosis/human taeniosis in Northern Turkana District, Kenya	2009-06-01	89	I	P	res
872	Heat-related mortality in dairy cattle: A case crossover study	2010-12-01	97	I	A	res
530	Cross-sectional study of the seroprevalence to Borrelia burgdorferi sensu lato and granulocytic Ehrlichia spp. and demographic, clinical and tick-exposure factors in Swedish horses	2001-05-01	49			res
531	A multicenter, matched case-control study of risk factors for equine laminitis	2001-05-01	49			res
539	Risk of introduction of BSE into Sweden by import of cattle from the United Kingdom	2002-06-01	54			res
796	Neighbourhood infections of classical swine fever during the 1997–1998 epidemic in The Netherlands	2003-12-01	61			res
807	Estimation of the age-dependent risk of infection to BSE of dairy cattle in Great Britain	2004-12-01	66			res
938	Estimating the population attributable fraction forschizophrenia when Toxoplasma gondii is assumed absent inhuman populations	2014-12-01	117			res
526	Factors associated with intersucking in Swiss dairy heifers	2000-06-01	45			res
617	Methodological approach for substantiating disease freedom in a heterogeneous small population. Application to ovine scrapie, a disease with a strong genetic susceptibility	2010-06-01	95			res
763	Quantification of the transmission of classical swine fever virus between herds during the 1997±1998 epidemic in The Netherlands	1999-12-01	42			res
813	Strategies for two-stage sampling designs for estimating herd-level prevalence	2004-12-01	66			res
414	Economic aspects of Q fever control in dairy goats	2015-09-01	121			res
705	A current lifetable and causes of death for insured dogs in Japan	2015-06-01	120	E	N	res
918	Factors influencing the demand of the service of communitybased animal health care in Zimbabwe	2013-11-01	112	E	N	res
358	Classical swine fever outbreak containment using antiviral supplementation: A potential alternative to emergency vaccination and stamping-out	2012-09-01	106	A	N	res
422	Use of Bayesian Belief Network techniques to explore the interaction of biosecurity practices on the probability of porcine disease occurrence in Canada	2016-09-01	131			res
536	Risk factors for repeat-breeder syndrome in New South Wales dairy cows	2002-06-01	54			res
788	Seasonality of canine leptospirosis in the United States and Canada and its association with rainfall	2002-12-01	56			res
543	Risk factors for metritis in Danish dairy cows	2002-06-01	54	A		res
834	Estimating the prevalence of BSE in dairy birth cohorts and predicting the incidence of BSE cases in Japan	2007-12-01	82	E	N	res
909	An approach to model monitoring and surveillance data ofwildlife diseases—Exemplified by Classical Swine Fever inwild boar	2013-11-01	112	E	N	res
133	Whirling disease dynamics: An analysis of intervention strategies	2014-03-01	113	E	N	res
442	Risk assessment and management of brucellosis in the southern greater Yellowstone area (I): A citizen-science based risk model for bovine brucellosis transmission from elk to cattle	2016-09-01	132			res
612	Antimicrobial use in Swiss dairy farms: Quantification and evaluation of data quality	2010-06-01	95			res
691	Comparing capture–recapture methods for estimation of the size of small and medium-sized populations using empirical data on commercial turkey farms in Canada	2015-06-01	120			res
945	Survival analysis of clinical mastitis data using a nestedfrailty Cox model fit as a mixed-effects Poisson model	2014-12-01	117	I	A	res
565	A model of animal–human brucellosis transmission in Mongolia	2005-06-01	69	I	N	res
891	Shorter-term risk of Mycobacterium bovis in Irish cattle following an inconclusive diagnosis to the single intradermal comparative tuberculin test	2011-12-01	102	A	A	res
334	A prospective study evaluating duration of swine breeding herd PRRS virus-free status and its relationship with measured risk	2010-09-01	96	E	A	res
102	Comparison of three alternative methods for analysis of equine Faecal Egg Count Reduction Test data	2010-03-01	93	E	N	res
143	Import risk assessment incorporating a dose–response model: Introduction of highly pathogenic porcine reproductive and respiratory syndrome into Australia via illegally imported raw pork	2014-03-01	113	E	N	res
827	Quantification of the contact structure in a feral cattle population and its hypothetical effect on the transmission of bovine herpesvirus 1	2006-12-01	77	A	N	res
942	Molecular epidemiology of Mycobacterium avium subsp.paratuberculosis isolated from sheep, cattle and deer on NewZealand pastoral farms	2014-12-01	117	A	N	res
200	Unraveling the contact patterns and network structure of pig shipments in the United States and its association with porcine reproductive and respiratory syndrome virus (PRRSV) outbreaks	2017-03-01	138	P	A	res
553	Estimation of infection prevalence from correlated binomial samples	2004-06-01	64	E	A	res
823	An epidemiologic study of late-term abortions in dairy cattle in Denmark, July 2000–August 2003	2006-12-01	77	P	A	res
910	A national-scale picture of U.S. cattle movements obtainedfrom Interstate Certificate of Veterinary Inspection data	2013-11-01	112	P	N	res
117	Epidemiologic and economic evaluation of risk-based meat inspection for bovine cysticercosis in Danish cattle	2013-03-01	108	I	N	res
153	Assessment of l-lactatemia as a predictor of respiratory disease recognition and severity in feedlot steers	2015-03-01	118	I	A	res
708	Description of an outbreak of highly pathogenic avian influenza in domestic ostriches (Struthio camelus) in South Africa in 2011	2016-06-01	128	E	A	res
770	Models for the dispersal in Australia of the arbovirus vector, Culicoides brevitarsis Kieffer (Diptera: Ceratopogonidae)	2000-12-01	47	E	N	res
947	A comparison of West Nile virus surveillance using survival analysesof dead corvid and mosquito pool data in Ontario, 2002–2008	2015-12-01	122	I	N	res
42	Animal- and herd-level risk factors for leptospiral seropositivity among sows in the Mekong delta, Vietnam	2002-03-01	53	E	A	res
53	The impact of badger removal on the control of tuberculosis in cattle herds in Ireland	2005-03-01	67	I	A	res
123	Quantitative versus qualitative approaches: A comparison of two research methods applied to identification of key health issues for working horses in Lesotho	2013-03-01	108	E	A	res
139	Cost-effectiveness of diagnostic strategies using quantitative real-time PCR and bacterial culture to identify contagious mastitis cases in large dairy herds	2014-03-01	113	E	A	res
182	Seroprevalence of Ehrlichia ruminantium antibodies and its associated risk factors in indigenous goats of South Africa	2016-03-01	125	I	A	res
266	Risk factors for the herd-level bacteriologic prevalence of Salmonella in Belgian slaughter pigs	2004-08-01	65	E	A	res
268	Herd-level seroprevalence and risk-mapping of bovine hypodermosis in Belgian cattle herds	2004-08-01	65	E	A	res
392	Risk factors associated with leg disorders of gestating sows in different group-housing systems: A cross-sectional study in 108 farrow-to-finish farms in France	2014-09-01	116	I	A	res
406	Herd-level prevalence and associated risk factors for Mycobacterium avium subsp. paratuberculosis in cattle in the State of Paraíba, Northeastern Brazil	2015-09-01	121	E	A	res
409	Prevalence and concentration of Escherichia coli O157 in different seasons and cattle types processed in North America: A systematic review and meta-analysis of published research	2015-09-01	121	I	A	res
446	Investigation of risk factors for mortality in aged guide dogs: A retrospective cohort study	2016-09-01	132	I	A	res
480	Predicting farm-level animal populations using environmental and socioeconomic variables	2017-09-01	145	I	A	res
512	Associations of Neospora caninum seropositivity with gestation number and pregnancy outcome in Danish dairy herds	1999-06-01	40	I	A	res
571	Risk factors for Campylobacter spp. colonization in broiler flocks in Iceland	2006-06-01	74	E	A	res
580	Prevalence of serum antibodies to bovine herpesvirus-1 and bovine viral diarrhea virus in beef cattle in Uruguay	2008-06-01	85	I	A	res
603	Risk factors of bovine tuberculosis in cattle in rural livestock production systems of Ethiopia	2009-06-01	89	I	A	res
642	Case control study to investigate risk factors for bovine neonatal pancytopenia (BNP) in young calves in southern Germany	2012-06-01	105	I	A	res
661	Factors related to the level of occurrence of bovine abortion in Chilean dairy herds	2013-06-01	110	I	A	res
682	Ewe characteristics associated with neonatal loss in Norwegian sheep	2014-06-01	114	P	A	res
722	Towards better-informed consent: Research with livestock-keepers and informal traders in East Africa	2016-06-01	128	I	A	res
838	Validation of computerized Swedish horse insurance data against veterinary clinical records	2007-12-01	82	I	A	res
844	Prevalence of VTEC O157 in dairy and veal herds and risk factors for veal herds	2008-11-01	87	I	A	res
882	Epidemiological aspects and financial impact of lumpy skin disease in Ethiopia	2011-12-01	102	I	P	res
883	Farm-level reproduction number during an epidemic of infectious salmon anemia virus in southern Chile in 2007–2009	2011-12-01	102	I	N	res
858	Meta-analytical equivalence studies on diagnostic tests for bovine brucellosis allowing assessment of a test against a group of comparative tests	2009-12-01	92			dis
834	Estimating the prevalence of BSE in dairy birth cohorts and predicting the incidence of BSE cases in Japan	2007-12-01	82			dis
423	Herd-level risk factors for bovine tuberculosis in French cattle herds	2016-09-01	131	A		dis
299	The application of risk analysis in aquatic animal health management	2007-09-01	81			dis
448	Contextual herd factors associated with cow culling risk in Québec dairy herds: A multilevel analysis	2017-09-01	144			dis
453	A protocol to identify and minimise selection and information bias in abattoir surveys estimating prevalence, using Fasciola hepatica as an example	2017-09-01	144			dis
826	Financial analysis of various strategies for the control of Neospora caninum in dairy cattle in Switzerland	2006-12-01	77			dis
147	Estimation of roaming dog populations in Timor Leste	2014-03-01	113			dis
164	Simulation of between-farm transmission of porcine reproductive and respiratory syndrome virus in Ontario, Canada using the North American Animal Disease Spread Model	2015-03-01	118			dis
824	Effect of Neospora caninum-serostatus on culling, reproductive performance and milk production in Dutch dairy herds with and without a history of Neospora caninum-associated abortion epidemics	2006-12-01	77			dis
911	Bayesian estimation of test characteristics of real-time PCR,bacteriological culture and California mastitis test fordiagnosis of intramammary infections with Staphylococcusaureus in dairy cattle at routine milk recordings	2013-11-01	112			dis
165	Coxiella burnetii seroprevalence and associated risk factors in dairy and mixed cattle farms from Ecuador	2015-03-01	118			dis
204	Estimation of the transmission parameters for swine influenza and porcine reproductive and respiratory syndrome viruses in pigs from weaning to slaughter under natural conditions	2017-03-01	138			dis
266	Risk factors for the herd-level bacteriologic prevalence of Salmonella in Belgian slaughter pigs	2004-08-01	65			dis
28	Community-based active surveillance for rabies in Machakos District, Kenya	2000-03-01	44			dis
301	Evaluation of underlying risk as a source of heterogeneity in meta-analyses: A simulation study of Bayesian and frequentist implementations of three models	2007-09-01	81			dis
389	A quantitative risk assessment of bovine theileriosis entering Luapula Province from Central Province in Zambia via live cattle imports from traditional and commercial production sectors	2014-09-01	116			dis
794	Evaluation of an absorbed ELISA and an agar-gel immuno-diffusion test for ovine paratuberculosis in sheep in Australia	2003-12-01	61			dis
878	Temporal distributions of respiratory disease events within cohorts of feedlot cattle and associations with cattle health and performance indices	2010-12-01	97			dis
377	Comparison of bovine tuberculosis recurrence in Irish herds between 1998 and 2008	2013-09-01	111	A		dis
358	Classical swine fever outbreak containment using antiviral supplementation: A potential alternative to emergency vaccination and stamping-out	2012-09-01	106	A		dis
828	Simulating the impact of four control strategies on the population dynamics of Neospora caninum infection in Swiss dairy cattle	2006-12-01	77	N		dis
62	The role of spatial mixing in the spread of foot-and-mouth disease	2006-03-01	73	I		dis
79	Parameter estimation and simulations of a mathematical model of Corynebacterium pseudotuberculosis transmission in sheep	2008-03-01	83	N		dis
166	Comparison of mark-resight methods to estimate abundance and rabies vaccination coverage of free-roaming dogs in two urban areas of south Bhutan	2015-03-01	118	E		dis
277	Herd-level factors associated with isolation of Salmonella in a multi-state study of conventional and organic dairy farms: I. Salmonella shedding in cows	2005-09-01	70	I		dis
444	Risk factors associated with contagious caprine pleuro-pneumonia in goats in pastoral areas in the Rift Valley region of Kenya	2016-09-01	132	P		dis
506	Management factors associated with Babesia bovis seroprevalence in cattle from eastern YucataÂn, Mexico	1999-06-01	40	I		dis
531	A multicenter, matched case-control study of risk factors for equine laminitis	2001-05-01	49	P		dis
559	Risk factors for the introduction of high pathogenicity Avian Influenza virus into poultry farms during the epidemic in the Netherlands in 2003	2005-06-01	69	A		dis
611	Effect of classifying disease states in genetic association studies for paratuberculosis	2010-06-01	95	I		dis
728	Assessment of concurrent infection with bovine viral diarrhoea virus (BVDV) and Mycobacterium bovis: A herd-level risk factor analysis from Northern Ireland	2017-06-01	141	A		dis
770	Models for the dispersal in Australia of the arbovirus vector, Culicoides brevitarsis Kieffer (Diptera: Ceratopogonidae)	2000-12-01	47	E		dis
788	Seasonality of canine leptospirosis in the United States and Canada and its association with rainfall	2002-12-01	56	E		dis
942	Molecular epidemiology of Mycobacterium avium subsp.paratuberculosis isolated from sheep, cattle and deer on NewZealand pastoral farms	2014-12-01	117	E		dis

## Sheet: Sig_review
ID	Title	Month_Year	Volume	Sig_result	Section
590	Veterinarian injuries associated with bovine TB testing livestock in Michigan, 2001	2009-06-01	89	A	abs
398	Identifying risk factors of avian infectious diseases at household level in Poyang Lake region, China	2014-09-01	116	A	abs
258	Optimizing replacement of dairy cows: modeling the effects of diseases	2003-09-01	61		abs
305	Global trade in ornamental fish from an Australian perspective: The case for revised import risk analysis and management strategies	2007-09-01	81		abs
429	Key management practices to prevent high infestation levels of Varroa destructor in honey bee colonies at the beginning of the honey yield season	2016-09-01	131		abs
445	The epidemiological and economic effects from systematic depopulation of Norwegian marine salmon farms infected with pancreas disease virus	2016-09-01	132		abs
664	Newborn piglet traits associated with survival and growth performance until weaning	2013-06-01	110		abs
890	Risk-based surveillance for avian influenza control along poultry market chains in South China: The value of social network analysis	2011-12-01	102		abs
471	Validation of a model for ranking aquaculture facilities for risk-based disease surveillance	2017-09-01	145	A	abs
38	Foot/leg udder health in relation to housing changes in Swedish dairy herds	2002-03-01	53	A	abs
17	The incidence, calf morbidity and mortality due to Theileria parva infections in smallholder dairy farms in Murang'a District, Kenya	1999-03-01	39	A	abs
57	Dynamics of verotoxin-producing Escherichia coli isolated from German beef cattle between birth and slaughter	2006-03-01	73	A	abs
85	Salmonella in Belgian laying hens: An identification of risk factors	2008-03-01	83	A	abs
119	Estimation of the reproduction ratio (R0) of bluetongue based on serological field data and comparison with other BTV transmission models	2013-03-01	108	A	abs
168	Alternatives to the use of antimicrobial agents in pig production: A multi-country expert-ranking of perceived effectiveness, feasibility and return on investment	2015-03-01	118	A	abs
252	Prevalence estimates for paratuberculosis adjusted for test variability using Bayesian analysis	2003-09-01	60	A	abs
260	Application of phylogeny reconstruction and character-evolution analysis to inferring patterns of directional microbial transmission	2003-09-01	61	A	abs
294	On distinguishing cause and consequence: Do high somatic cell counts lead to lower milk yield or does high milk yield lead to lower somatic cell count?	2006-09-01	76	A	abs
300	Exploring the role of auction markets in cattle movements within Great Britain	2007-09-01	81	A	abs
341	A case-control study of atypical scrapie in GB sheep flocks	2010-09-01	96	A	abs
377	Comparison of bovine tuberculosis recurrence in Irish herds between 1998 and 2008	2013-09-01	111	A	abs
444	Risk factors associated with contagious caprine pleuro-pneumonia in goats in pastoral areas in the Rift Valley region of Kenya	2016-09-01	132	A	abs
464	Quantitative and qualitative analysis of antimicrobial usage in white veal calves in France	2017-09-01	144	A	abs
508	Salmonella level of Danish swine herds based on serological examination of meat-juice samples and salmonella occurrence measured by bacteriological follow-up	1999-06-01	40	A	abs
586	Herd and cow-level prevalence of sole ulcers in The Netherlands and associated-risk factors	2008-06-01	85	A	abs
621	Spatial and temporal clustering of calcium oxalate and magnesium ammonium phosphate uroliths in dogs living in Ontario, Canada between 1998 and 2006	2010-06-01	95	A	abs
689	Quantitative and qualitative assessment of the bovine abortion surveillance system in France	2015-06-01	120	A	abs
740	Returns from strategic anthelmintic treatments in village cattle in the Gambia	1997-10-01	32	A	abs
763	Quantification of the transmission of classical swine fever virus between herds during the 1997±1998 epidemic in The Netherlands	1999-12-01	42	A	abs
789	Simulated effect of pig-population density on epidemic size and choice of control strategy for classical swine fever epidemics in The Netherlands	2002-12-01	56	A	abs
844	Prevalence of VTEC O157 in dairy and veal herds and risk factors for veal herds	2008-11-01	87	A	abs
952	Comparison of mixed effects models of antimicrobial resistancemetrics of livestock and poultry Salmonella isolates from a nationalmonitoring system	2015-12-01	122	A	abs
334	A prospective study evaluating duration of swine breeding herd PRRS virus-free status and its relationship with measured risk	2010-09-01	96	N	abs
503	Associations of veterinary services and farmer characteristics with the prevalences of brucellosis and border disease in small ruminants in Spain	1999-06-01	40	N	abs
521	Prevalence and distribution of gastro-intestinal helminths and haemoparasites in young scavenging chickens in upper eastern region of Ghana, West Africa	2000-06-01	45	N	abs
974	Behaviour of European badgers and non-target species towardscandidate baits for oral delivery of a tuberculosis vaccine	2016-12-01	135	N	abs
15	Prevalence and risk factors associated with adventitious bursitis in live growing and finishing pigs in south-west England	1999-03-01	39	A	abs
289	Effect of pathogen-specific clinical mastitis on herd life in two New York State dairy herds	2005-09-01	71	N	abs
777	Herd-level risk factors associated with Leptospira spp. seroprevalence in dairy and beef cattle in Spain	2001-12-01	52	N	abs
62	The role of spatial mixing in the spread of foot-and-mouth disease	2006-03-01	73	A	abs
101	Susceptibility to paratuberculosis infection in cattle is associated with single nucleotide polymorphisms in Toll-like receptor 2 which modulate immune responses against Mycobacterium avium subspecies paratuberculosis	2010-03-01	93	A	abs
115	Influence of a marine algae supplementation on the oxidative status of plasma in dairy cows during the periparturient period	2012-03-01	103	A	abs
129	Economic impacts of adoption and fundraising strategies in animal shelters	2014-03-01	113	A	abs
223	Influence of Trypanosoma evansi infection on milk yield of dairy cattle in northeast Thailand	1999-09-01	42	A	abs
257	Male, female and management risk factors for non-return to service in Dutch mares	2003-09-01	61	A	abs
266	Risk factors for the herd-level bacteriologic prevalence of Salmonella in Belgian slaughter pigs	2004-08-01	65	A	abs
326	Space-time Bayesian survival modeling of chronic wasting disease in deer	2009-09-01	91	A	abs
387	Bovine tuberculosis in Northern Ireland: Risk factors associated with time from post-outbreak test to subsequent herd breakdown	2014-09-01	116	A	abs
393	Comparison of time to PRRSv-stability and production losses between two exposure programs to control PRRSv in sow herds	2014-09-01	116	A	abs
405	Epidemiology and impact of Fasciola hepatica exposure in high-yielding dairy herds	2015-09-01	121	A	abs
412	Impact of particulate matter and ammonia on average daily weight gain, mortality and lung lesions in pigs	2015-09-01	121	A	abs
443	Ostertagia spp., rumen fluke and liver fluke single- and poly-infections in cattle: An abattoir study of prevalence and production impacts in England and Wales	2016-09-01	132	A	abs
490	Risk factors for false-positive serological reactions for bovine brucellosis in SaoÃne-et-Loire (France)	1998-06-01	35	A	abs
566	An exploratory study on risk factors for postweaning multisystemic wasting syndrome (PMWS) in Spain	2005-06-01	69	A	abs
632	A cluster-randomised controlled trial to compare the effectiveness of different knowledge-transfer interventions for rural working equid users in Ethiopia	2011-06-01	100	A	abs
651	Investigation of mortality in Pacific oysters associated with Ostreid herpesvirus-1 Var in the Republic of Ireland in 2009	2012-06-01	105	A	abs
682	Ewe characteristics associated with neonatal loss in Norwegian sheep	2014-06-01	114	A	abs
723	Canine leptospirosis in Switzerland—A prospective cross-sectional study examining seroprevalence, risk factors and urinary shedding of pathogenic leptospires	2017-06-01	141	A	abs
759	Using a tobit regression model to analyse risk factors for foot-pad dermatitis in commercially grown broilers	1998-12-01	37	A	abs
906	Validation of Nordic dairy cattle disease recording databases—Completeness for locomotor disorders	2012-12-01	107	A	abs
957	A trend analysis of antimicrobial resistance in commensalEscherichia coli from several livestock species in Belgium (2011–2014)	2015-12-01	122	A	abs
811	Quantification of the spread of Mycoplasma hyopneumoniae in nursery pigs using transmission experiments	2004-12-01	66	N	abs
963	Quantification of antimicrobial usage in dairy cows and preweanedcalves in Argentina	2015-12-01	122	N	abs
530	Cross-sectional study of the seroprevalence to Borrelia burgdorferi sensu lato and granulocytic Ehrlichia spp. and demographic, clinical and tick-exposure factors in Swedish horses	2001-05-01	49	P	abs
601	Farm-level factors associated with above-average production on pig farms in Evia, Greece	2009-06-01	89	P	abs
343	Monitoring bluetongue disease (BTV-1) epidemic in southern Spain during 2007	2010-09-01	96	P	abs
624	Absence reduction in entomological surveillance data to improve niche-based distribution models for Culicoides imicola	2011-06-01	100	P	abs
449	VacciCost – A tool to estimate the resource requirements for implementing livestock vaccination campaigns. Application to peste des petits ruminants (PPR) vaccination in Senegal	2017-09-01	144	A	abs
896	A description of the demographic characteristics of the New Zealand non-commercial horse population with data collected using a generalised random-tessellation stratified sampling design	2012-12-01	107	A	abs
824	Effect of Neospora caninum-serostatus on culling, reproductive performance and milk production in Dutch dairy herds with and without a history of Neospora caninum-associated abortion epidemics	2006-12-01	77	P	dis
188	Prevention of abortion in cattle following vaccination against bovine herpesvirus 1: A meta-analysis	2017-03-01	138	A	dis
923	Perceptions of veterinarians in bovine practice and producerswith beef cow-calf operations enrolled in the US VoluntaryBovine Johne’s Disease Control Program concerningeconomic losses associated with Johne’s disease	2013-11-01	112	A	dis
889	Relationship between somatic cell count status and subsequent clinical mastitis in Dutch dairy cows	2011-12-01	102	P	dis
912	Can early host responses to mycobacterial infection predicteventual disease outcomes?	2013-11-01	112	P	dis
785	Neonatal-piglet weight variation and its relation to pre-weaning mortality and weight gain on commercial farms	2002-12-01	56	P	dis
587	Flock-level case–control study of slaughter-lamb pneumonia in New Zealand	2008-06-01	85	P	dis
341	A case-control study of atypical scrapie in GB sheep flocks	2010-09-01	96	N	dis
137	Prevalence and risk factors of Coxiella burnetii seropositivity in Danish beef and dairy cattle at slaughter adjusted for test uncertainty	2014-03-01	113	A	dis
164	Simulation of between-farm transmission of porcine reproductive and respiratory syndrome virus in Ontario, Canada using the North American Animal Disease Spread Model	2015-03-01	118	A	dis
7	Individual and group antimicrobial usage rates on 34 farrow-to-finish swine farms in Ontario, Canada	1998-03-01	34		dis
69	A pedigree-analysis approach to the descriptive epidemiology of autosomal- recessive disorders	2007-03-01	78		dis
166	Comparison of mark-resight methods to estimate abundance and rabies vaccination coverage of free-roaming dogs in two urban areas of south Bhutan	2015-03-01	118		dis
176	Dam’s infection progress and within-herd prevalence as predictors of Mycobacterium avium subsp. paratuberculosis ELISA response in Danish Holstein cattle	2016-03-01	125	A	dis
250	Direct production losses and treatment costs from bovine viral diarrhoea virus, bovine leukosis virus, Mycobacterium avium subspecies paratuberculosis, and Neospora caninum	2002-09-01	55		dis
293	Bayesian estimation of sensitivity and specificity of serum ELISA and faecal culture for diagnosis of paratuberculosis in Greek dairy sheep and goats	2006-09-01	76		dis
299	The application of risk analysis in aquatic animal health management	2007-09-01	81		dis
310	Development of methodology to prioritise wildlife pathogens for surveillance	2007-09-01	81		dis
348	Ruminant brucellosis in Upper Egypt (2005-2008)	2011-09-01	101		dis
389	A quantitative risk assessment of bovine theileriosis entering Luapula Province from Central Province in Zambia via live cattle imports from traditional and commercial production sectors	2014-09-01	116		dis
437	Broken biosecurity? Veterinarians’ framing of biosecurity on dairy farms in England	2016-09-01	132		dis
463	Maximum entropy modeling risk of anthrax in the Republic of Kazakhstan	2017-09-01	144		dis
509	A simulation model for studying the role of pre-slaughter factors on the exposure of beef carcasses to human microbial hazards	1999-06-01	41		dis
561	Animal and farm influences on the dynamics of antibiotic resistance in faecal Escherichia coli in young dairy calves	2005-06-01	69		dis
652	Cost of post-weaning multi-systemic wasting syndrome and porcine circovirus type-2 subclinical infection in England – An economic disease model	2013-06-01	110		dis
708	Description of an outbreak of highly pathogenic avian influenza in domestic ostriches (Struthio camelus) in South Africa in 2011	2016-06-01	128		dis
826	Financial analysis of various strategies for the control of Neospora caninum in dairy cattle in Switzerland	2006-12-01	77		dis
834	Estimating the prevalence of BSE in dairy birth cohorts and predicting the incidence of BSE cases in Japan	2007-12-01	82		dis
656	Major causes of organs and carcass condemnation in small ruminants slaughtered at Luna Export Abattoir, Oromia Regional State, Ethiopia	2013-06-01	110	A	dis
861	PrP genotype: A flock-level risk factor for scrapie?	2009-12-01	92		dis
975	Diagnostic accuracy of clinical illness for bovine respiratory disease(BRD) diagnosis in beef cattle placed in feedlots: A systematicliterature review and hierarchical Bayesian latent-class meta-analysis	2016-12-01	135		dis
911	Bayesian estimation of test characteristics of real-time PCR,bacteriological culture and California mastitis test fordiagnosis of intramammary infections with Staphylococcusaureus in dairy cattle at routine milk recordings	2013-11-01	112		dis
133	Whirling disease dynamics: An analysis of intervention strategies	2014-03-01	113		dis
641	A semi-parametric model for lactation curves: Development and application	2012-06-01	105		dis
62	The role of spatial mixing in the spread of foot-and-mouth disease	2006-03-01	73		dis
321	Statistical approaches to the monitoring and surveillance of infectious diseases for veterinary public health	2009-09-01	91	A	dis
190	Economic consequences of paratuberculosis control in dairy cattle: A stochastic modeling study	2017-03-01	138	P	dis
594	Association of growth, feeding practices and exercise conditions with the prevalence of Developmental Orthopaedic Disease in limbs of French foals at weaning	2009-06-01	89	P	dis
797	Path analysis of subsistence farmers’ use of veterinary services in Zimbabwe	2003-12-01	61	P	dis
759	Using a tobit regression model to analyse risk factors for foot-pad dermatitis in commercially grown broilers	1998-12-01	37	A	dis
925	Relative associations of cattle movements, local spread,and biosecurity with bovine viral diarrhoea virus (BVDV)seropositivity in beef and dairy herds	2013-11-01	112	A	dis
17	The incidence, calf morbidity and mortality due to Theileria parva infections in smallholder dairy farms in Murang'a District, Kenya	1999-03-01	39		dis
58	Prevalence of Salmonella spp. on Canadian pig farms using liquid or dry-feeding	2006-03-01	73	N	dis
68	Animal-based national surveillance for zoonotic disease: Quality, limitations, and implications of a model system for monitoring rabies	2007-03-01	78	A	dis
153	Assessment of l-lactatemia as a predictor of respiratory disease recognition and severity in feedlot steers	2015-03-01	118	A	dis
200	Unraveling the contact patterns and network structure of pig shipments in the United States and its association with porcine reproductive and respiratory syndrome virus (PRRSV) outbreaks	2017-03-01	138	A	dis
210	Helminthosis in local and cross-bred pigs in the Morogoro region of Tanzania	1997-09-01	32	N	dis
263	Participatory diagnosis of a heat-intolerance syndrome in cattle in Tanzania and association with foot-and-mouth disease	2004-08-01	65	A	dis
300	Exploring the role of auction markets in cattle movements within Great Britain	2007-09-01	81	A	dis
334	A prospective study evaluating duration of swine breeding herd PRRS virus-free status and its relationship with measured risk	2010-09-01	96	N	dis
377	Comparison of bovine tuberculosis recurrence in Irish herds between 1998 and 2008	2013-09-01	111	A	dis
483	Application of composite estimation in studies of animal population production with two-stage repeated sample designs	1997-05-01	30	A	dis
512	Associations of Neospora caninum seropositivity with gestation number and pregnancy outcome in Danish dairy herds	1999-06-01	40	N	dis
610	The association between bulk tank milk analysis for raw milk quality	2010-06-01	95	A	dis
646	The relationship between clinical signs of respiratory system disorders and lung lesions at slaughter in veal calves	2012-06-01	105	A	dis
655	The value of animal movement tracing: A case study simulating the spread and control of foot-and-mouth disease in California	2013-06-01	110	A	dis
709	A participatory approach to design monitoring indicators ofproduction diseases in organic dairy farms	2016-06-01	128	A	dis
737	Papillomatous digital dermatitis on a commercial dairy farm in Mexicali, Mexico: Incidence and effect on reproduction and milk production	1997-10-01	32	N	dis
742	A Cox proportional-hazards model with time-dependent covariates to evaluate the relationship between body-condition score and the risks of first insemination and pregnancy in a high-producing dairy herd	1998-12-01	37	N	dis
770	Models for the dispersal in Australia of the arbovirus vector, Culicoides brevitarsis Kieffer (Diptera: Ceratopogonidae)	2000-12-01	47	N	dis
860	Preferences of cost factors for mastitis management among Dutch dairy farmers using adaptive conjoint analysis	2009-12-01	92	A	dis
879	An evaluation of Foot-and-Mouth Disease outbreak reporting in mainland South-East Asia from 2000 to 2010	2011-12-01	102	A	dis
880	Assessing human–dog conflicts in Todos Santos, Guatemala: Bite incidences and public perception	2011-12-01	102	N	dis
942	Molecular epidemiology of Mycobacterium avium subsp.paratuberculosis isolated from sheep, cattle and deer on NewZealand pastoral farms	2014-12-01	117	A	dis
63	The association between Mycobacterium avium subsp. paratuberculosis fecal shedding or clinical Johne's disease and lactation performance on two Minnesota, USA dairy farms	2007-03-01	78	A	dis
109	Effect of a difficult calving on the vigour of the calf, the onset of maternal behaviour, and some behavioural indicators of pain in the dam	2012-03-01	103	N	dis
391	Exploring cattle movements in Belgium	2014-09-01	116	A	dis
774	Choropleth mapping of regional count data of Echinococcus multilocularis among red foxes in Lower Saxony, Germany	2001-12-01	52	A	dis
551	Analysis of correlated discrete observations: background, examples and solutions	2003-06-01	59	N	dis
828	Simulating the impact of four control strategies on the population dynamics of Neospora caninum infection in Swiss dairy cattle	2006-12-01	77	A	dis
217	Comparison of ELISA and 2-META assays used in serological diagnosis of infection with Actinobacillus pleuropneumoniae serotypes 2 and 4?7 in breeding pigs in Croatia	1998-09-01	36	A	dis
703	Dietary oregano essential oil alleviates experimentally induced coccidiosis in broilers	2015-06-01	120	N	dis
852	Dog obesity: Owner attitudes and behaviour	2009-12-01	92	A	dis
763	Quantification of the transmission of classical swine fever virus between herds during the 1997±1998 epidemic in The Netherlands	1999-12-01	42	A	dis
751	Mortality attributed to respiratory problems among finisher pigs in the United States	1998-12-01	37	N	dis
363	Horse owners'/managers' perceptions about effectiveness of biosecurity measures based on their experiences during the 2007 equine influenza outbreak in Australia	2012-09-01	106	P	dis
531	A multicenter, matched case-control study of risk factors for equine laminitis	2001-05-01	49	A	dis
16	Factors affecting milk urea nitrogen and protein concentrations in Quebec dairy cows	1999-03-01	39	A	dis
57	Dynamics of verotoxin-producing Escherichia coli isolated from German beef cattle between birth and slaughter	2006-03-01	73	A	dis
76	Tetracycline-resistance in lactose-positive enteric coliforms originating from Belgian fattening pigs: Degree of resistance, multiple resistance and risk factors	2007-03-01	78	P	dis
82	Self-clearance from BVDV infections—A frequent finding in dairy herds in an endemically infected region in Peru	2008-03-01	83	P	dis
106	A meta-analysis comparing the effect of PCV2 vaccines on average daily weight gain and mortality rate in pigs from weaning to slaughter	2011-03-01	98	P	dis
113	Risk factors for displaced abomasum or ketosis in Swedish dairy herds	2012-03-01	103	N	dis
121	The interaction of host genetics and disease processes in chronic livestock disease: A simulation model of ovine footrot	2013-03-01	108	P	dis
124	Determinants of biosecurity behaviour of British cattle and sheep farmers—A behavioural economics analysis	2013-03-01	108	A	dis
129	Economic impacts of adoption and fundraising strategies in animal shelters	2014-03-01	113	A	dis
142	Effects of quarter individual and conventional milking systems on teat condition	2014-03-01	113	P	dis
157	Economic analysis of vaccination to control bovine brucellosis in the States of Sao Paulo and Mato Grosso, Brazil	2015-03-01	118	A	dis
159	Unravelling the temporal association between lameness and body condition score in dairy cattle using a multistate modelling approach	2015-03-01	118	A	dis
163	Cryptosporidium parvum infection and associated risk factors in dairy calves in western France	2015-03-01	118	P	dis
174	Low prevalence of Salmonella in Swedish dairy herds highlight differences between serotypes	2016-03-01	125	P	dis
235	Farm-management and milking practices associated with the presence of Listeria monocytogenes in New York state dairy herds	2001-09-01	51	A	dis
260	Application of phylogeny reconstruction and character-evolution analysis to inferring patterns of directional microbial transmission	2003-09-01	61	A	dis
266	Risk factors for the herd-level bacteriologic prevalence of Salmonella in Belgian slaughter pigs	2004-08-01	65	P	dis
277	Herd-level factors associated with isolation of Salmonella in a multi-state study of conventional and organic dairy farms: I. Salmonella shedding in cows	2005-09-01	70	P	dis
358	Classical swine fever outbreak containment using antiviral supplementation: A potential alternative to emergency vaccination and stamping-out	2012-09-01	106	P	dis
379	Herd-level risk factors for Campylobacter fetus infection, Brucella seropositivity and within-herd seroprevalence of brucellosis in cattle in northern Nigeria	2013-09-01	111	P	dis
388	Bovine herpesvirus type 1 marker vaccine induces cross-protection against bubaline herpesvirus type 1 in water buffalo	2014-09-01	116	A	dis
394	Risk factors associated with persistence of Salmonella shedding in finishing pigs	2014-09-01	116	P	dis
423	Herd-level risk factors for bovine tuberculosis in French cattle herds	2016-09-01	131	P	dis
438	A retrospective epidemiological analysis of risk factors for a primary necropsy diagnosis of bovine respiratory disease	2016-09-01	132	P	dis
444	Risk factors associated with contagious caprine pleuro-pneumonia in goats in pastoral areas in the Rift Valley region of Kenya	2016-09-01	132	P	dis
448	Contextual herd factors associated with cow culling risk in Québec dairy herds: A multilevel analysis	2017-09-01	144	P	dis
456	Spatial dynamics of porcine epidemic diarrhea (PED) spread in the southern Kyushu, Japan	2017-09-01	144	A	dis
461	Epidemiological features and financial loss due to clinically diagnosed Haemorrhagic Septicemia in bovines in Karnataka, India	2017-09-01	144	A	dis
559	Risk factors for the introduction of high pathogenicity Avian Influenza virus into poultry farms during the epidemic in the Netherlands in 2003	2005-06-01	69	P	dis
566	An exploratory study on risk factors for postweaning multisystemic wasting syndrome (PMWS) in Spain	2005-06-01	69	A	dis
611	Effect of classifying disease states in genetic association studies for paratuberculosis	2010-06-01	95	A	dis
624	Absence reduction in entomological surveillance data to improve niche-based distribution models for Culicoides imicola	2011-06-01	100	A	dis
728	Assessment of concurrent infection with bovine viral diarrhoea virus (BVDV) and Mycobacterium bovis: A herd-level risk factor analysis from Northern Ireland	2017-06-01	141	P	dis
750	Management-related risk factors for M. paratuberculosis infection in Michigan, USA, dairy herds	1998-12-01	37	P	dis
777	Herd-level risk factors associated with Leptospira spp. seroprevalence in dairy and beef cattle in Spain	2001-12-01	52	A	dis
794	Evaluation of an absorbed ELISA and an agar-gel immuno-diffusion test for ovine paratuberculosis in sheep in Australia	2003-12-01	61	P	dis
844	Prevalence of VTEC O157 in dairy and veal herds and risk factors for veal herds	2008-11-01	87	P	dis
847	Risk factors for time to diagnosis of feline upper respiratory tract disease in UK animal adoption shelters	2008-11-01	87	P	dis
878	Temporal distributions of respiratory disease events within cohorts of feedlot cattle and associations with cattle health and performance indices	2010-12-01	97	A	dis
882	Epidemiological aspects and financial impact of lumpy skin disease in Ethiopia	2011-12-01	102	A	dis
933	Cost assessment of the movement restriction policy in Franceduring the 2006 bluetongue virus episode (BTV-8)	2014-12-01	117	P	dis
965	Spatial and temporal analyses of metrics of tuberculosis infection inbadgers (Meles meles) from the Republic of Ireland: Trends inapparent prevalence	2015-12-01	122	P	dis
978	Investigating interactions between UK horse owners and prescribersof anthelmintics	2016-12-01	135	A	dis

## Sheet: Key
Worksheet	Description
Initial search	Contain data from initial keyword search. Data are frequency counts for each element (P value, CI, and Significance) in each section: abstract, text table, result table, results, and discussion.
Pvalue_review	In-deepth reivew of reported P value. See below for details.
CI_review	In-deepth reivew of reported CI. See below for details.
Sig_review	In-deepth reivew of reported Significance. See below for details.
Element	Variable name	Description							Variables
Pvalue	True_numb	report numeric p or inequality. Codes: A: report numeric p for all; N: report inequality only; P: partial, report both numeric and imprecise p.							ID
Pvalue in abstract/table/result (additional)	Sig_p	frequency of reporting p<0.05							DataEntry
Pvalue in abstract/table/result (additional)	NonSig_P	frequency of reporting p>=0.05							Month_Year
CI	As_sig	repot CI as sig. Codes: A: interpret as sig for all; N: interpret as sig for none; P: partial; I: didn't interpret; E: if study aim was estimation.							Volume
CI in abstract/result (additional)	Epi_measure	report CI for epi measures (including commonly used epidemiological disease measures: incidence, hazard rate, prevalence, mortality, and associated effect measures): A: CI reported only for listed epi measures; N: CI reported for measures other than listed epi measures; P: Partial.							Sig_result
Sig	Sig_result	A: report only significant; N: report only not significant or non-significant; P: Partial							Note
									P_abs
									CI_abs
									CI_result_text
									CI_table
									CI_discuss
									Year
									Ponly_abs
									SigOnly_abs
									CIonly_abs
									PnSig_abs
									PnCI_abs
									SigNCI_abs
									All_abs
									Ponly_discuss
									SigOnly_discuss
									CIonly_discuss
									PnSig_discuss
									PnCI_discuss
									SigNCI_discuss
									All_discuss
									Num_abs
									Num_discuss
									Num_result
									Ponly_result
									PnSig_result
									PnCI_result
									CIonly_result
									CInSig_result
									Sigonly_result
									All_result
									Ponly_table
									PnSig_table
									PnCI_table
									CIonly_table
									CInSig_table
									Sigonly_table
									All_table
